# Supplementary material for: Investigating the role of nutrition and self-monitoring in osteoarthritis management: evidence from a cross-sectional study of UK adults
Source: Research Square preprint supplement (doi:10.21203/rs.3.rs-6239209/v1), 2025-04-01
Supplement: Supplementary file 1 [file a0cf59cddd54ae4e0fd4413b.xlsx]

## Sheet: Sheet1
Q1_2_consent	Q3_Yes_myself	Q3_Yes_I_know_someone	Q3_No	Q4_Exercise_physical_activity	Q4_Weightmanagement	Q4_Medication_prescription_only	Q4_Medication_OTC	Q4_Physiotherapy	Q4_Nutrition	Q4_Supplements	Q4_Herbs	Q4_Surgery	Q4_None_of_above	Q5_Yes_No	Q6_NHS_website	Q6_NHS_doctor_advice	Q6_BBC_Food	Q6_Magazines	Q6_Blogs	Q6_dietitian_nutritionist	Q6_Charities	Q6_Other	Q6_Text_free	Q7_dietary_improve_OA	Q7_dietary_exacerbate_OA	Q7_Inflam_noninflam_diet		Q8_Yes_No	Q9_1_anti_inflammatory_diet	Q9_2_exercise_losing_weight	Q9_3_prescription_only_med	Q9_4_OTC	Q9_5_vitamin_mineral	Q9_6_physical_therapy	Q9_7_assistive_devices	Q9_8_surgery	Q10_likely_scale	Q11_1_online_coaching	Q11_2_F2F_coaching	Q11_3_hybrid_coaching	Q11_4_mobile_app_coaching	Q11_5_Telephone_coaching	Q12_1_Time_prepare_meals	Q12_2_not_sure_right_diet	Q12_3_eating_is_boring	Q12_4_hard_follow_diet	Q12_5_job_makes_hard	Q12_6_cost_of_living	Q13_Yes_No
Yes			No										None of the above	No										Stongly Disagree	Stongly Disagree	Agree		Yes	Agree	Disagree	Stongly Disagree	Neither agree nor disagree	Strongly Agree	Neither agree nor disagree	Stongly Disagree	Stongly Disagree													No
Yes			No						Nutrition as medicine (anti-inflammatory diet)	Supplements (e.g., Chondroitin, Glucosamine)				No										Agree	Agree	Agree		Yes	Agree	Agree	Disagree	Disagree	Agree	Agree	Agree	Neither agree nor disagree													No
Yes		Yes- I know someone		Exercise & physical activity		Medication (prescription only)		Physiotherapy		Supplements (e.g., Chondroitin, Glucosamine)				Yes	NHS (website)			Magazines (e.g., Women's/ Men's Health, Good Housekeeping)			Charities (e.g., Versus Arthritis, Arthritis Action)			Neither agree nor disagree	Neither agree nor disagree	Disagree		Yes	Agree	Agree	Neither agree nor disagree	Agree	Agree	Agree	Agree	Neither agree nor disagree													No
Yes			No										None of the above	No										Stongly Disagree	Stongly Disagree	Stongly Disagree		Yes	Agree	Agree	Neither agree nor disagree	Neither agree nor disagree	Agree	Agree	Agree	Neither agree nor disagree													No
Yes			No	Exercise & physical activity	Weight management	Medication (prescription only)		Physiotherapy	Nutrition as medicine (anti-inflammatory diet)	Supplements (e.g., Chondroitin, Glucosamine)		Surgery		No										Stongly Disagree	Stongly Disagree	Disagree		No	Agree	Agree	Agree	Agree	Agree	Agree	Agree	Agree													No
Yes			No										None of the above	No										Stongly Disagree	Stongly Disagree	Neither agree nor disagree		Yes	Agree	Strongly Agree	Neither agree nor disagree	Strongly Agree	Agree	Strongly Agree	Neither agree nor disagree	Agree													No
Yes		Yes- I know someone		Exercise & physical activity	Weight management	Medication (prescription only)	Medication (over the counter)	Physiotherapy	Nutrition as medicine (anti-inflammatory diet)	Supplements (e.g., Chondroitin, Glucosamine)				Yes	NHS (website)				Blogs		Charities (e.g., Versus Arthritis, Arthritis Action)			Agree	Agree	Agree		Yes	Strongly Agree	Strongly Agree	Disagree	Agree	Agree	Agree	Agree	Disagree													Yes, please explain
Yes			No	Exercise & physical activity				Physiotherapy	Nutrition as medicine (anti-inflammatory diet)					No										Agree	Agree	Agree		Yes	Agree	Agree	Neither agree nor disagree	Strongly Agree	Disagree	Stongly Disagree	Disagree	Disagree													No
Yes		Yes- I know someone			Weight management			Physiotherapy						No										Agree	Neither agree nor disagree	Neither agree nor disagree		Yes	Neither agree nor disagree	Agree	Neither agree nor disagree	Neither agree nor disagree	Neither agree nor disagree	Agree	Neither agree nor disagree	Agree													No
Yes	Yes - myself	Yes- I know someone		Exercise & physical activity	Weight management	Medication (prescription only)	Medication (over the counter)	Physiotherapy	Nutrition as medicine (anti-inflammatory diet)	Supplements (e.g., Chondroitin, Glucosamine)		Surgery		Yes	NHS (website)	NHS (doctor's advice)				A dietitian/ nutritionist				Neither agree nor disagree	Neither agree nor disagree	Agree		Yes	Agree	Agree	Agree	Agree	Agree	Agree	Agree	Agree	Unlikely	Very interested	Interested	Interested	Interested	Neutral	Likely	Likely	Likely	Likely	Likely	Likely	No
Yes			No	Exercise & physical activity		Medication (prescription only)								No										Neither agree nor disagree	Neither agree nor disagree	Neither agree nor disagree		No	Neither agree nor disagree	Neither agree nor disagree	Neither agree nor disagree	Neither agree nor disagree	Neither agree nor disagree	Neither agree nor disagree	Neither agree nor disagree	Neither agree nor disagree													No
Yes		Yes- I know someone		Exercise & physical activity	Weight management	Medication (prescription only)								No										Neither agree nor disagree	Neither agree nor disagree	Stongly Disagree		Yes	Agree	Agree	Agree	Agree	Agree	Agree	Agree	Agree													Yes, please explain
Yes		Yes- I know someone		Exercise & physical activity	Weight management	Medication (prescription only)		Physiotherapy	Nutrition as medicine (anti-inflammatory diet)			Surgery		No										Agree	Agree	Agree		Yes	Agree	Agree	Agree	Agree	Agree	Agree	Agree	Agree													Yes, please explain
Yes		Yes- I know someone		Exercise & physical activity	Weight management	Medication (prescription only)		Physiotherapy						Yes	NHS (website)	NHS (doctor's advice)								Agree	Agree	Agree		Yes	Agree	Agree	Neither agree nor disagree	Agree	Agree	Agree	Agree	Disagree													No
Yes		Yes- I know someone		Exercise & physical activity	Weight management	Medication (prescription only)				Supplements (e.g., Chondroitin, Glucosamine)				No										Disagree	Disagree	Agree		Yes	Agree	Agree	Neither agree nor disagree	Agree	Agree	Agree	Agree	Neither agree nor disagree													No
Yes			No										None of the above	No										Neither agree nor disagree	Neither agree nor disagree	Agree		Yes	Neither agree nor disagree	Agree	Neither agree nor disagree	Disagree	Strongly Agree	Neither agree nor disagree	Neither agree nor disagree	Neither agree nor disagree													No
Yes	Yes - myself			Exercise & physical activity	Weight management	Medication (prescription only)	Medication (over the counter)	Physiotherapy	Nutrition as medicine (anti-inflammatory diet)	Supplements (e.g., Chondroitin, Glucosamine)		Surgery		Yes	NHS (website)			Magazines (e.g., Women's/ Men's Health, Good Housekeeping)	Blogs		Charities (e.g., Versus Arthritis, Arthritis Action)			Agree	Agree	Agree		Yes	Strongly Agree	Strongly Agree	Strongly Agree	Strongly Agree	Strongly Agree	Strongly Agree	Strongly Agree	Strongly Agree	Neutral	Very interested	Very interested	Very interested	Neutral	Slightly interested	Very Likely	Very Likely	Very Likely	Very Likely	Likely	Very Likely	No
Yes		Yes- I know someone			Weight management	Medication (prescription only)		Physiotherapy						No										Stongly Disagree	Stongly Disagree	Stongly Disagree		No	Agree	Strongly Agree	Agree	Agree	Agree	Strongly Agree	Agree	Agree													Yes, please explain
Yes		Yes- I know someone		Exercise & physical activity	Weight management	Medication (prescription only)								No										Disagree	Disagree	Disagree		No	Agree	Agree	Agree	Agree	Agree	Agree	Agree	Agree													Yes, please explain
Yes		Yes- I know someone											None of the above	No										Disagree	Strongly Agree	Neither agree nor disagree		No	Agree	Strongly Agree	Agree	Neither agree nor disagree	Strongly Agree	Agree	Agree	Disagree													No
Yes		Yes- I know someone		Exercise & physical activity	Weight management	Medication (prescription only)		Physiotherapy	Nutrition as medicine (anti-inflammatory diet)	Supplements (e.g., Chondroitin, Glucosamine)				No										Agree	Agree	Agree		Yes	Agree	Agree	Neither agree nor disagree	Neither agree nor disagree	Agree	Agree	Agree	Agree													No
Yes		Yes- I know someone		Exercise & physical activity	Weight management	Medication (prescription only)								No										Disagree	Disagree	Disagree		Yes	Agree	Agree	Agree	Agree	Agree	Agree	Neither agree nor disagree	Neither agree nor disagree													No
Yes			No										None of the above	No										Stongly Disagree	Stongly Disagree	Stongly Disagree		No	Agree	Agree	Neither agree nor disagree	Agree	Agree	Agree	Agree	Neither agree nor disagree													No
Yes		Yes- I know someone		Exercise & physical activity					Nutrition as medicine (anti-inflammatory diet)	Supplements (e.g., Chondroitin, Glucosamine)				Yes	NHS (website)							Other	Search on the net	Neither agree nor disagree	Neither agree nor disagree	Agree		Yes	Strongly Agree	Strongly Agree	Disagree	Disagree	Agree	Agree	Agree	Neither agree nor disagree													No
Yes		Yes- I know someone		Exercise & physical activity	Weight management	Medication (prescription only)		Physiotherapy						No										Agree	Neither agree nor disagree	Neither agree nor disagree		Yes	Agree	Strongly Agree	Strongly Agree	Strongly Agree	Strongly Agree	Strongly Agree	Neither agree nor disagree	Agree													No
Yes		Yes- I know someone		Exercise & physical activity	Weight management				Nutrition as medicine (anti-inflammatory diet)					No										Disagree	Agree	Agree		No	Agree	Strongly Agree	Agree	Agree	Neither agree nor disagree	Neither agree nor disagree	Neither agree nor disagree	Stongly Disagree													No
Yes		Yes- I know someone											None of the above	No										Neither agree nor disagree	Neither agree nor disagree	Neither agree nor disagree		Yes	Neither agree nor disagree	Neither agree nor disagree	Neither agree nor disagree	Neither agree nor disagree	Neither agree nor disagree	Neither agree nor disagree	Neither agree nor disagree	Neither agree nor disagree													No
Yes			No	Exercise & physical activity	Weight management	Medication (prescription only)			Nutrition as medicine (anti-inflammatory diet)					No										Stongly Disagree	Stongly Disagree	Stongly Disagree		No	Agree	Agree	Agree	Agree	Agree	Agree	Agree	Disagree													No
Yes		Yes- I know someone			Weight management	Medication (prescription only)		Physiotherapy	Nutrition as medicine (anti-inflammatory diet)					No										Neither agree nor disagree	Neither agree nor disagree	Agree		No	Agree	Agree	Agree	Agree	Agree	Agree	Agree	Agree													No
Yes		Yes- I know someone			Weight management	Medication (prescription only)	Medication (over the counter)	Physiotherapy		Supplements (e.g., Chondroitin, Glucosamine)				No										Stongly Disagree	Stongly Disagree	Stongly Disagree		Yes	Strongly Agree	Strongly Agree	Strongly Agree	Strongly Agree	Strongly Agree	Strongly Agree	Neither agree nor disagree	Neither agree nor disagree													No
Yes			No	Exercise & physical activity	Weight management	Medication (prescription only)			Nutrition as medicine (anti-inflammatory diet)	Supplements (e.g., Chondroitin, Glucosamine)				Yes	NHS (website)			Magazines (e.g., Women's/ Men's Health, Good Housekeeping)	Blogs					Agree	Agree	Agree		Yes	Strongly Agree	Agree	Neither agree nor disagree	Neither agree nor disagree	Agree	Strongly Agree	Agree	Agree													No
Yes		Yes- I know someone		Exercise & physical activity		Medication (prescription only)	Medication (over the counter)			Supplements (e.g., Chondroitin, Glucosamine)		Surgery		Yes	NHS (website)				Blogs					Agree	Agree	Agree		Yes	Agree	Strongly Agree	Disagree	Disagree	Strongly Agree	Neither agree nor disagree	Agree	Strongly Agree													No
Yes		Yes- I know someone		Exercise & physical activity	Weight management	Medication (prescription only)		Physiotherapy		Supplements (e.g., Chondroitin, Glucosamine)		Surgery		No										Agree	Agree	Strongly Agree		Yes	Strongly Agree	Strongly Agree	Agree	Agree	Agree	Agree	Neither agree nor disagree	Neither agree nor disagree													No
Yes		Yes- I know someone	No	Exercise & physical activity	Weight management	Medication (prescription only)		Physiotherapy						No										Stongly Disagree	Stongly Disagree	Stongly Disagree		Yes	Strongly Agree	Strongly Agree	Strongly Agree	Agree	Agree	Strongly Agree	Strongly Agree	Agree													No
Yes		Yes- I know someone		Exercise & physical activity	Weight management	Medication (prescription only)		Physiotherapy						No										Agree	Disagree	Agree		No	Disagree	Agree	Agree	Agree	Strongly Agree	Strongly Agree	Stongly Disagree	Stongly Disagree													No
Yes		Yes- I know someone		Exercise & physical activity				Physiotherapy		Supplements (e.g., Chondroitin, Glucosamine)				No										Disagree	Disagree	Agree		Yes	Agree	Agree	Neither agree nor disagree	Neither agree nor disagree	Agree	Agree	Neither agree nor disagree	Disagree													Yes, please explain
Yes			No	Exercise & physical activity	Weight management	Medication (prescription only)		Physiotherapy	Nutrition as medicine (anti-inflammatory diet)	Supplements (e.g., Chondroitin, Glucosamine)				No										Disagree	Disagree	Neither agree nor disagree		Yes	Strongly Agree	Strongly Agree	Agree	Agree	Strongly Agree	Strongly Agree	Agree	Agree													Yes, please explain
Yes			No	Exercise & physical activity		Medication (prescription only)		Physiotherapy						No										Disagree	Disagree	Agree		Yes	Neither agree nor disagree	Neither agree nor disagree	Agree	Agree	Agree	Strongly Agree	Agree	Neither agree nor disagree													No
Yes		Yes- I know someone				Medication (prescription only)	Medication (over the counter)							No										Agree	Agree	Agree		Yes	Agree	Strongly Agree	Strongly Agree	Strongly Agree	Strongly Agree	Strongly Agree	Strongly Agree	Strongly Agree													No
Yes		Yes- I know someone		Exercise & physical activity	Weight management	Medication (prescription only)	Medication (over the counter)	Physiotherapy	Nutrition as medicine (anti-inflammatory diet)	Supplements (e.g., Chondroitin, Glucosamine)		Surgery		Yes	NHS (website)					A dietitian/ nutritionist	Charities (e.g., Versus Arthritis, Arthritis Action)			Strongly Agree	Strongly Agree	Strongly Agree		Yes	Strongly Agree	Strongly Agree	Strongly Agree	Strongly Agree	Strongly Agree	Strongly Agree	Strongly Agree	Strongly Agree													No
Yes		Yes- I know someone		Exercise & physical activity	Weight management	Medication (prescription only)		Physiotherapy				Surgery		Yes	NHS (website)	NHS (doctor's advice)								Agree	Agree	Agree		Yes	Agree	Agree	Agree	Agree	Strongly Agree	Agree	Strongly Agree	Neither agree nor disagree													No
Yes			No			Medication (prescription only)	Medication (over the counter)		Nutrition as medicine (anti-inflammatory diet)					No										Disagree	Disagree	Neither agree nor disagree		Yes	Agree	Agree	Agree	Agree	Agree	Disagree	Agree	Agree													No
Yes			No	Exercise & physical activity					Nutrition as medicine (anti-inflammatory diet)	Supplements (e.g., Chondroitin, Glucosamine)		Surgery		Yes	NHS (website)		BBC Food (website)							Disagree	Disagree	Agree		Yes	Agree	Agree	Neither agree nor disagree	Neither agree nor disagree	Agree	Agree	Agree	Neither agree nor disagree													No
Yes			No	Exercise & physical activity		Medication (prescription only)		Physiotherapy						No										Disagree	Disagree	Agree		Yes	Strongly Agree	Strongly Agree	Neither agree nor disagree	Agree	Strongly Agree	Strongly Agree	Agree	Neither agree nor disagree													No
Yes		Yes- I know someone		Exercise & physical activity	Weight management		Medication (over the counter)	Physiotherapy		Supplements (e.g., Chondroitin, Glucosamine)				Yes								Other	Search Engine	Stongly Disagree	Stongly Disagree	Disagree		Yes	Agree	Strongly Agree	Agree	Agree	Strongly Agree	Strongly Agree	Neither agree nor disagree	Agree													Yes, please explain
Yes		Yes- I know someone				Medication (prescription only)		Physiotherapy						No										Stongly Disagree	Stongly Disagree	Disagree		No	Neither agree nor disagree	Agree	Agree	Agree	Agree	Strongly Agree	Disagree	Agree													No
Yes		Yes- I know someone		Exercise & physical activity	Weight management	Medication (prescription only)	Medication (over the counter)	Physiotherapy	Nutrition as medicine (anti-inflammatory diet)			Surgery		Yes	NHS (website)	NHS (doctor's advice)					Charities (e.g., Versus Arthritis, Arthritis Action)			Disagree	Neither agree nor disagree	Agree		Yes	Agree	Strongly Agree	Agree	Strongly Agree	Neither agree nor disagree	Strongly Agree	Strongly Agree	Strongly Agree													No
Yes			No	Exercise & physical activity	Weight management	Medication (prescription only)	Medication (over the counter)	Physiotherapy	Nutrition as medicine (anti-inflammatory diet)					No										Stongly Disagree	Stongly Disagree	Stongly Disagree		Yes	Strongly Agree	Strongly Agree	Agree	Agree	Agree	Strongly Agree	Agree	Neither agree nor disagree													No
Yes		Yes- I know someone		Exercise & physical activity										No										Disagree	Disagree	Agree		Yes	Agree	Agree	Disagree	Disagree	Agree	Agree	Agree	Disagree													No
Yes		Yes- I know someone		Exercise & physical activity		Medication (prescription only)	Medication (over the counter)			Supplements (e.g., Chondroitin, Glucosamine)				No										Neither agree nor disagree	Neither agree nor disagree	Agree		Yes	Strongly Agree	Strongly Agree	Strongly Agree	Agree	Strongly Agree	Strongly Agree	Strongly Agree	Strongly Agree													No
Yes		Yes- I know someone				Medication (prescription only)		Physiotherapy						Yes	NHS (website)	NHS (doctor's advice)			Blogs					Agree	Neither agree nor disagree	Agree		Yes	Agree	Agree	Disagree	Agree	Agree	Agree	Agree	Disagree													No
Yes	Yes - myself			Exercise & physical activity	Weight management	Medication (prescription only)	Medication (over the counter)	Physiotherapy	Nutrition as medicine (anti-inflammatory diet)	Supplements (e.g., Chondroitin, Glucosamine)		Surgery		Yes	NHS (website)				Blogs	A dietitian/ nutritionist	Charities (e.g., Versus Arthritis, Arthritis Action)			Agree	Agree	Agree		Yes	Strongly Agree	Strongly Agree	Agree	Agree	Agree	Strongly Agree	Agree	Neither agree nor disagree	Likely	Interested	Interested	Interested	Interested	Interested	Neither likely nor unlikely	Likely	Unlikely	Likely	Unlikely	Neither likely nor unlikely	No
Yes			No										None of the above	No										Stongly Disagree	Stongly Disagree	Stongly Disagree		No	Agree	Agree	Agree	Agree	Agree	Agree	Agree	Agree													No
Yes			No	Exercise & physical activity	Weight management	Medication (prescription only)			Nutrition as medicine (anti-inflammatory diet)	Supplements (e.g., Chondroitin, Glucosamine)				No										Agree	Agree	Neither agree nor disagree		No	Agree	Agree	Agree	Agree	Agree	Agree	Agree	Agree													No
Yes			No	Exercise & physical activity		Medication (prescription only)		Physiotherapy						No										Disagree	Disagree	Disagree		No	Agree	Agree	Agree	Agree	Agree	Agree	Agree	Agree													No
Yes			No	Exercise & physical activity				Physiotherapy	Nutrition as medicine (anti-inflammatory diet)					No										Stongly Disagree	Stongly Disagree	Stongly Disagree		No	Agree	Agree	Agree	Strongly Agree	Strongly Agree	Strongly Agree	Neither agree nor disagree	Disagree													Yes, please explain
Yes	Yes - myself			Exercise & physical activity	Weight management				Nutrition as medicine (anti-inflammatory diet)	Supplements (e.g., Chondroitin, Glucosamine)		Surgery		No										Neither agree nor disagree	Neither agree nor disagree	Disagree		Yes	Agree	Strongly Agree	Strongly Agree	Strongly Agree	Strongly Agree	Agree	Agree	Strongly Agree	Very unlikely	Very interested	Neutral	Neutral	Very interested	Not at all interested	Unlikely	Unlikely	Unlikely	Unlikely	Unlikely	Very Unlikely	No
Yes			No			Medication (prescription only)	Medication (over the counter)		Nutrition as medicine (anti-inflammatory diet)					No										Disagree	Disagree	Agree		Yes	Neither agree nor disagree	Agree	Agree	Agree	Agree	Agree	Neither agree nor disagree	Agree													No
Yes		Yes- I know someone		Exercise & physical activity		Medication (prescription only)		Physiotherapy				Surgery		No										Disagree	Stongly Disagree	Strongly Agree		Yes	Strongly Agree	Strongly Agree	Agree	Disagree	Agree	Agree	Stongly Disagree	Agree													No
Yes	Yes - myself			Exercise & physical activity	Weight management	Medication (prescription only)	Medication (over the counter)	Physiotherapy		Supplements (e.g., Chondroitin, Glucosamine)				No										Disagree	Disagree	Neither agree nor disagree		Yes	Strongly Agree	Agree	Agree	Neither agree nor disagree	Neither agree nor disagree	Agree	Agree	Agree	Unlikely	Interested	Neutral	Neutral	Very interested	Not at all interested	Likely	Likely	Unlikely	Unlikely	Likely	Neither likely nor unlikely	No
Yes			No	Exercise & physical activity	Weight management			Physiotherapy						No										Disagree	Disagree	Agree		Yes	Agree	Agree	Agree	Agree	Neither agree nor disagree	Agree	Agree	Disagree													No
Yes		Yes- I know someone		Exercise & physical activity		Medication (prescription only)		Physiotherapy						No										Disagree	Disagree	Agree		Yes	Agree	Agree	Agree	Agree	Agree	Agree	Agree	Agree													No
Yes		Yes- I know someone		Exercise & physical activity		Medication (prescription only)		Physiotherapy				Surgery		No										Stongly Disagree	Stongly Disagree	Agree		Yes	Agree	Agree	Agree	Agree	Agree	Agree	Agree	Agree													Yes, please explain
Yes			No	Exercise & physical activity		Medication (prescription only)		Physiotherapy						No										Neither agree nor disagree	Neither agree nor disagree	Agree		Yes	Agree	Agree	Neither agree nor disagree	Disagree	Agree	Agree	Neither agree nor disagree	Neither agree nor disagree													No
Yes		Yes- I know someone		Exercise & physical activity	Weight management			Physiotherapy	Nutrition as medicine (anti-inflammatory diet)					Yes	NHS (website)						Charities (e.g., Versus Arthritis, Arthritis Action)			Agree	Agree	Agree		Yes	Agree	Strongly Agree	Agree	Strongly Agree	Agree	Neither agree nor disagree	Neither agree nor disagree	Disagree													Yes, please explain
Yes			No	Exercise & physical activity		Medication (prescription only)		Physiotherapy	Nutrition as medicine (anti-inflammatory diet)	Supplements (e.g., Chondroitin, Glucosamine)				No										Disagree	Neither agree nor disagree	Stongly Disagree		Yes	Strongly Agree	Strongly Agree	Agree	Neither agree nor disagree	Neither agree nor disagree	Agree	Neither agree nor disagree	Neither agree nor disagree													No
Yes		Yes- I know someone		Exercise & physical activity		Medication (prescription only)	Medication (over the counter)	Physiotherapy				Surgery		No										Disagree	Neither agree nor disagree	Disagree		Yes	Agree	Strongly Agree	Agree	Agree	Agree	Agree	Agree	Neither agree nor disagree													No
Yes		Yes- I know someone											None of the above	No										Stongly Disagree	Stongly Disagree	Agree		Yes	Agree	Agree	Agree	Agree	Strongly Agree	Strongly Agree	Strongly Agree	Strongly Agree													Yes, please explain
Yes	Yes - myself	Yes- I know someone		Exercise & physical activity	Weight management	Medication (prescription only)	Medication (over the counter)	Physiotherapy	Nutrition as medicine (anti-inflammatory diet)	Supplements (e.g., Chondroitin, Glucosamine)		Surgery		Yes	NHS (website)									Neither agree nor disagree	Stongly Disagree	Disagree		Yes	Agree	Agree	Agree	Neither agree nor disagree	Strongly Agree	Strongly Agree	Strongly Agree	Agree	Very unlikely	Interested	Interested	Neutral	Slightly interested	Slightly interested	Very Likely	Very Likely	Unlikely	Very Likely	Very Unlikely	Very Likely	Yes, please explain
Yes		Yes- I know someone				Medication (prescription only)		Physiotherapy	Nutrition as medicine (anti-inflammatory diet)					No										Disagree	Disagree	Disagree		Yes	Agree	Agree	Agree	Agree	Agree	Agree	Agree	Agree													No
Yes			No										None of the above	No										Disagree	Disagree	Agree		Yes	Agree	Agree	Neither agree nor disagree	Neither agree nor disagree	Neither agree nor disagree	Neither agree nor disagree	Neither agree nor disagree	Neither agree nor disagree													No
Yes			No			Medication (prescription only)	Medication (over the counter)	Physiotherapy		Supplements (e.g., Chondroitin, Glucosamine)				No										Stongly Disagree	Disagree	Agree		Yes	Neither agree nor disagree	Agree	Agree	Strongly Agree	Neither agree nor disagree	Neither agree nor disagree	Disagree	Stongly Disagree													No
Yes		Yes- I know someone				Medication (prescription only)				Supplements (e.g., Chondroitin, Glucosamine)				Yes	NHS (website)							Other	Google articles	Neither agree nor disagree	Neither agree nor disagree	Agree		Yes	Agree	Agree	Neither agree nor disagree	Neither agree nor disagree	Neither agree nor disagree	Agree	Neither agree nor disagree	Neither agree nor disagree													No
Yes		Yes- I know someone		Exercise & physical activity		Medication (prescription only)		Physiotherapy						No										Agree	Neither agree nor disagree	Agree		Yes	Agree	Agree	Agree	Neither agree nor disagree	Neither agree nor disagree	Agree	Neither agree nor disagree	Disagree													No
Yes		Yes- I know someone		Exercise & physical activity	Weight management	Medication (prescription only)	Medication (over the counter)	Physiotherapy		Supplements (e.g., Chondroitin, Glucosamine)		Surgery		No										Disagree	Disagree	Stongly Disagree		Yes	Agree	Agree	Agree	Stongly Disagree	Agree	Agree	Agree	Neither agree nor disagree													No
Yes			No	Exercise & physical activity	Weight management		Medication (over the counter)							No										Neither agree nor disagree	Neither agree nor disagree	Disagree		Yes	Agree	Agree	Neither agree nor disagree	Agree	Agree	Strongly Agree	Strongly Agree	Neither agree nor disagree													No
Yes		Yes- I know someone		Exercise & physical activity	Weight management	Medication (prescription only)	Medication (over the counter)	Physiotherapy	Nutrition as medicine (anti-inflammatory diet)	Supplements (e.g., Chondroitin, Glucosamine)	Herbs	Surgery		No										Agree	Agree	Agree		Yes	Strongly Agree	Strongly Agree	Agree	Agree	Strongly Agree	Strongly Agree	Strongly Agree	Agree													Yes, please explain
Yes			No	Exercise & physical activity	Weight management	Medication (prescription only)	Medication (over the counter)		Nutrition as medicine (anti-inflammatory diet)	Supplements (e.g., Chondroitin, Glucosamine)	Herbs			Yes	NHS (website)		BBC Food (website)				Charities (e.g., Versus Arthritis, Arthritis Action)	Other	Internet	Agree	Agree	Agree		Yes	Strongly Agree	Strongly Agree	Neither agree nor disagree	Agree	Agree	Agree	Agree	Neither agree nor disagree													Yes, please explain
Yes			No					Physiotherapy						No										Disagree	Disagree	Disagree		No	Neither agree nor disagree	Neither agree nor disagree	Neither agree nor disagree	Neither agree nor disagree	Neither agree nor disagree	Neither agree nor disagree	Neither agree nor disagree	Neither agree nor disagree													No
Yes			No										None of the above	No										Agree	Agree	Agree		No	Agree	Agree	Disagree	Agree	Agree	Strongly Agree	Agree	Disagree													No
Yes		Yes- I know someone		Exercise & physical activity	Weight management				Nutrition as medicine (anti-inflammatory diet)	Supplements (e.g., Chondroitin, Glucosamine)				Yes		NHS (doctor's advice)						Other	google	Agree	Agree	Agree		Yes	Strongly Agree	Strongly Agree	Disagree	Disagree	Strongly Agree	Agree	Disagree	Stongly Disagree													Yes, please explain
Yes		Yes- I know someone		Exercise & physical activity		Medication (prescription only)	Medication (over the counter)	Physiotherapy	Nutrition as medicine (anti-inflammatory diet)		Herbs			No										Agree	Neither agree nor disagree	Agree		Yes	Agree	Neither agree nor disagree	Neither agree nor disagree	Neither agree nor disagree	Agree	Agree	Agree	Neither agree nor disagree													Yes, please explain
Yes			No	Exercise & physical activity										No										Stongly Disagree	Stongly Disagree	Stongly Disagree		Yes	Agree	Strongly Agree	Agree	Disagree	Strongly Agree	Strongly Agree	Strongly Agree	Disagree													No
Yes			No	Exercise & physical activity		Medication (prescription only)		Physiotherapy				Surgery		No										Disagree	Agree	Neither agree nor disagree		Yes	Strongly Agree	Agree	Strongly Agree	Agree	Agree	Neither agree nor disagree	Disagree	Disagree													No
Yes		Yes- I know someone		Exercise & physical activity		Medication (prescription only)		Physiotherapy						No										Stongly Disagree	Stongly Disagree	Stongly Disagree		No	Strongly Agree	Strongly Agree	Agree	Agree	Agree	Strongly Agree	Strongly Agree	Strongly Agree													Yes, please explain
Yes		Yes- I know someone		Exercise & physical activity	Weight management	Medication (prescription only)				Supplements (e.g., Chondroitin, Glucosamine)				Yes	NHS (website)		BBC Food (website)		Blogs	A dietitian/ nutritionist				Agree	Agree	Neither agree nor disagree		Yes	Agree	Agree	Neither agree nor disagree	Disagree	Strongly Agree	Neither agree nor disagree	Agree	Neither agree nor disagree													No
Yes	Yes - myself			Exercise & physical activity	Weight management									No										Neither agree nor disagree	Disagree	Disagree		Yes	Agree	Agree	Disagree	Neither agree nor disagree	Agree	Neither agree nor disagree	Disagree	Disagree	Unlikely	Neutral	Slightly interested	Neutral	Interested	Neutral	Neither likely nor unlikely	Likely	Neither likely nor unlikely	Unlikely	Very Unlikely	Neither likely nor unlikely	No
Yes		Yes- I know someone		Exercise & physical activity		Medication (prescription only)		Physiotherapy	Nutrition as medicine (anti-inflammatory diet)		Herbs			Yes	NHS (website)	NHS (doctor's advice)	BBC Food (website)	Magazines (e.g., Women's/ Men's Health, Good Housekeeping)		A dietitian/ nutritionist				Agree	Disagree	Disagree		Yes	Neither agree nor disagree	Agree	Agree	Disagree	Disagree	Agree	Disagree	Stongly Disagree													No
Yes			No	Exercise & physical activity		Medication (prescription only)								No										Disagree	Stongly Disagree	Disagree		Yes	Agree	Agree	Agree	Agree	Agree	Agree	Agree	Agree													No
Yes			No	Exercise & physical activity	Weight management	Medication (prescription only)	Medication (over the counter)	Physiotherapy	Nutrition as medicine (anti-inflammatory diet)					No										Stongly Disagree	Stongly Disagree	Stongly Disagree		No	Strongly Agree	Strongly Agree	Strongly Agree	Strongly Agree	Strongly Agree	Strongly Agree	Strongly Agree	Strongly Agree													No
Yes			No	Exercise & physical activity		Medication (prescription only)		Physiotherapy		Supplements (e.g., Chondroitin, Glucosamine)				No										Stongly Disagree	Stongly Disagree	Stongly Disagree		Yes	Strongly Agree	Strongly Agree	Strongly Agree	Strongly Agree	Strongly Agree	Strongly Agree	Strongly Agree	Strongly Agree													No
Yes	Yes - myself			Exercise & physical activity	Weight management	Medication (prescription only)	Medication (over the counter)	Physiotherapy	Nutrition as medicine (anti-inflammatory diet)	Supplements (e.g., Chondroitin, Glucosamine)				Yes	NHS (website)	NHS (doctor's advice)								Strongly Agree	Strongly Agree	Agree		Yes	Agree	Agree	Agree	Strongly Agree	Strongly Agree	Agree	Strongly Agree	Neither agree nor disagree	Neutral	Not at all interested	Not at all interested	Not at all interested	Interested	Not at all interested	Likely	Likely	Neither likely nor unlikely	Very Likely	Neither likely nor unlikely	Very Likely	No
Yes	Yes - myself	Yes- I know someone		Exercise & physical activity	Weight management	Medication (prescription only)	Medication (over the counter)	Physiotherapy	Nutrition as medicine (anti-inflammatory diet)			Surgery		No										Disagree	Disagree	Disagree		Yes	Agree	Agree	Agree	Agree	Agree	Agree	Agree	Agree	Neutral	Interested	Interested	Interested	Interested	Interested	Likely	Likely	Unlikely	Likely	Unlikely	Unlikely	No
Yes			No	Exercise & physical activity	Weight management			Physiotherapy						Yes	NHS (website)				Blogs	A dietitian/ nutritionist				Disagree	Disagree	Disagree		Yes	Agree	Agree	Neither agree nor disagree	Neither agree nor disagree	Disagree	Strongly Agree	Disagree	Neither agree nor disagree													No
Yes			No	Exercise & physical activity	Weight management	Medication (prescription only)			Nutrition as medicine (anti-inflammatory diet)					No										Agree	Agree	Neither agree nor disagree		Yes	Agree	Agree	Agree	Agree	Agree	Agree	Agree	Neither agree nor disagree													No
Yes			No		Weight management	Medication (prescription only)		Physiotherapy				Surgery		No										Neither agree nor disagree	Agree	Disagree		Yes	Neither agree nor disagree	Strongly Agree	Disagree	Agree	Neither agree nor disagree	Agree	Neither agree nor disagree	Neither agree nor disagree													No
Yes			No	Exercise & physical activity		Medication (prescription only)			Nutrition as medicine (anti-inflammatory diet)		Herbs			No										Neither agree nor disagree	Agree	Agree		Yes	Strongly Agree	Agree	Neither agree nor disagree	Stongly Disagree	Neither agree nor disagree	Agree	Agree	Disagree													No
Yes		Yes- I know someone		Exercise & physical activity	Weight management	Medication (prescription only)								No										Stongly Disagree	Stongly Disagree	Stongly Disagree		Yes	Agree	Agree	Agree	Agree	Agree	Agree	Agree	Agree													No
Yes		Yes- I know someone				Medication (prescription only)						Surgery		No										Disagree	Disagree	Disagree		Yes	Agree	Agree	Neither agree nor disagree	Agree	Strongly Agree	Agree	Agree	Neither agree nor disagree													No
Yes		Yes- I know someone		Exercise & physical activity	Weight management	Medication (prescription only)	Medication (over the counter)							Yes				Magazines (e.g., Women's/ Men's Health, Good Housekeeping)	Blogs					Agree	Agree	Neither agree nor disagree		Yes	Strongly Agree	Strongly Agree	Agree	Agree	Strongly Agree	Strongly Agree	Agree	Agree													No
Yes			No	Exercise & physical activity	Weight management			Physiotherapy						No										Stongly Disagree	Agree	Neither agree nor disagree		No	Neither agree nor disagree	Agree	Agree	Agree	Agree	Agree	Agree	Agree													No
Yes		Yes- I know someone		Exercise & physical activity	Weight management	Medication (prescription only)	Medication (over the counter)	Physiotherapy						No										Neither agree nor disagree	Agree	Agree		Yes	Strongly Agree	Strongly Agree	Disagree	Agree	Agree	Strongly Agree	Agree	Neither agree nor disagree													No
Yes		Yes- I know someone											None of the above	No										Stongly Disagree	Stongly Disagree	Neither agree nor disagree		Yes	Agree	Agree	Neither agree nor disagree	Agree	Agree	Agree	Agree	Disagree													No
Yes		Yes- I know someone		Exercise & physical activity	Weight management									Yes						A dietitian/ nutritionist				Neither agree nor disagree	Neither agree nor disagree	Disagree		Yes	Neither agree nor disagree	Neither agree nor disagree	Disagree	Disagree	Neither agree nor disagree	Neither agree nor disagree	Disagree	Disagree													No
Yes			No										None of the above	No
Yes		Yes- I know someone		Exercise & physical activity	Weight management	Medication (prescription only)	Medication (over the counter)	Physiotherapy		Supplements (e.g., Chondroitin, Glucosamine)				Yes	NHS (website)	NHS (doctor's advice)			Blogs	A dietitian/ nutritionist				Agree	Agree	Agree		Yes	Agree	Agree	Agree	Agree	Agree	Agree	Neither agree nor disagree	Agree													No
Yes		Yes- I know someone		Exercise & physical activity		Medication (prescription only)		Physiotherapy		Supplements (e.g., Chondroitin, Glucosamine)		Surgery		No										Stongly Disagree	Stongly Disagree	Disagree		Yes	Neither agree nor disagree	Neither agree nor disagree	Disagree	Disagree	Neither agree nor disagree	Agree	Agree	Agree													Yes, please explain
Yes		Yes- I know someone		Exercise & physical activity		Medication (prescription only)	Medication (over the counter)	Physiotherapy				Surgery		No										Disagree	Disagree	Neither agree nor disagree		Yes	Agree	Agree	Agree	Agree	Agree	Agree	Agree	Agree													No
Yes		Yes- I know someone		Exercise & physical activity	Weight management	Medication (prescription only)			Nutrition as medicine (anti-inflammatory diet)			Surgery		No										Stongly Disagree	Stongly Disagree	Strongly Agree		No	Strongly Agree	Neither agree nor disagree	Disagree	Agree	Strongly Agree	Strongly Agree	Strongly Agree	Strongly Agree													Yes, please explain
Yes	Yes - myself			Exercise & physical activity	Weight management	Medication (prescription only)						Surgery		No										Neither agree nor disagree	Neither agree nor disagree	Neither agree nor disagree		Yes	Agree	Agree	Agree	Agree	Neither agree nor disagree	Neither agree nor disagree	Neither agree nor disagree	Agree	Neutral	Neutral	Not at all interested	Not at all interested	Slightly interested	Not at all interested	Neither likely nor unlikely	Likely	Likely	Likely	Neither likely nor unlikely	Likely	No
Yes	Yes - myself	Yes- I know someone		Exercise & physical activity	Weight management	Medication (prescription only)	Medication (over the counter)	Physiotherapy		Supplements (e.g., Chondroitin, Glucosamine)		Surgery		No										Stongly Disagree	Stongly Disagree	Stongly Disagree		No	Neither agree nor disagree	Agree	Agree	Agree	Agree	Agree	Agree	Agree	Very unlikely	Not at all interested	Not at all interested	Not at all interested	Slightly interested	Not at all interested	Unlikely	Likely	Likely	Likely	Very Unlikely	Very Likely	No
Yes		Yes- I know someone		Exercise & physical activity	Weight management	Medication (prescription only)		Physiotherapy	Nutrition as medicine (anti-inflammatory diet)			Surgery		No										Agree	Disagree	Agree		Yes	Agree	Agree	Agree	Agree	Agree	Agree	Agree	Neither agree nor disagree													No
Yes	Yes - myself			Exercise & physical activity	Weight management									Yes	NHS (website)	NHS (doctor's advice)				A dietitian/ nutritionist				Disagree	Disagree	Disagree		No	Agree	Agree	Agree	Agree	Strongly Agree	Agree	Agree	Agree	Likely	Neutral	Interested	Neutral	Neutral	Neutral	Neither likely nor unlikely	Likely	Unlikely	Unlikely	Unlikely	Neither likely nor unlikely	No
Yes			No	Exercise & physical activity	Weight management	Medication (prescription only)	Medication (over the counter)	Physiotherapy	Nutrition as medicine (anti-inflammatory diet)	Supplements (e.g., Chondroitin, Glucosamine)				No										Stongly Disagree	Stongly Disagree	Stongly Disagree		Yes	Agree	Agree	Agree	Agree	Agree	Agree	Agree	Neither agree nor disagree													No
Yes	Yes - myself			Exercise & physical activity	Weight management	Medication (prescription only)	Medication (over the counter)	Physiotherapy		Supplements (e.g., Chondroitin, Glucosamine)	Herbs	Surgery		No										Disagree	Disagree	Disagree		Yes	Neither agree nor disagree	Agree	Agree	Agree	Agree	Agree	Neither agree nor disagree	Neither agree nor disagree	Unlikely	Neutral	Neutral	Neutral	Not at all interested	Not at all interested	Likely	Very Likely	Likely	Neither likely nor unlikely	Neither likely nor unlikely	Very Likely	No
Yes		Yes- I know someone		Exercise & physical activity										No										Stongly Disagree	Stongly Disagree	Stongly Disagree		No	Strongly Agree	Strongly Agree	Agree	Strongly Agree	Strongly Agree	Strongly Agree	Agree	Neither agree nor disagree													No
Yes		Yes- I know someone		Exercise & physical activity	Weight management	Medication (prescription only)		Physiotherapy	Nutrition as medicine (anti-inflammatory diet)	Supplements (e.g., Chondroitin, Glucosamine)				Yes					Blogs		Charities (e.g., Versus Arthritis, Arthritis Action)			Agree	Neither agree nor disagree	Agree		Yes	Strongly Agree	Strongly Agree	Neither agree nor disagree	Disagree	Strongly Agree	Agree	Agree	Stongly Disagree													No
Yes	Yes - myself			Exercise & physical activity	Weight management	Medication (prescription only)				Supplements (e.g., Chondroitin, Glucosamine)				Yes	NHS (website)	NHS (doctor's advice)								Disagree	Disagree	Stongly Disagree		Yes	Strongly Agree	Strongly Agree	Strongly Agree	Neither agree nor disagree	Strongly Agree	Strongly Agree	Agree	Agree	Unlikely	Interested	Slightly interested	Slightly interested	Not at all interested	Not at all interested	Neither likely nor unlikely	Very Likely	Neither likely nor unlikely	Likely	Very Unlikely	Likely	No
Yes		Yes- I know someone		Exercise & physical activity	Weight management	Medication (prescription only)	Medication (over the counter)	Physiotherapy	Nutrition as medicine (anti-inflammatory diet)			Surgery		No										Stongly Disagree	Stongly Disagree	Disagree		No	Agree	Agree	Agree	Agree	Agree	Agree	Agree	Agree													No
Yes		Yes- I know someone		Exercise & physical activity	Weight management	Medication (prescription only)		Physiotherapy						No										Disagree	Disagree	Disagree		Yes	Agree	Agree	Agree	Agree	Agree	Agree	Agree	Disagree													No
Yes		Yes- I know someone		Exercise & physical activity	Weight management			Physiotherapy						Yes	NHS (website)	NHS (doctor's advice)			Blogs					Agree	Stongly Disagree	Disagree		Yes	Strongly Agree	Strongly Agree	Neither agree nor disagree	Agree	Agree	Agree	Agree	Agree													No
Yes			No					Physiotherapy				Surgery		No										Stongly Disagree	Stongly Disagree	Disagree		Yes	Agree	Agree	Neither agree nor disagree	Agree	Agree	Agree	Agree	Neither agree nor disagree													No
Yes	Yes - myself			Exercise & physical activity		Medication (prescription only)	Medication (over the counter)	Physiotherapy				Surgery		No										Stongly Disagree	Stongly Disagree	Stongly Disagree		Yes	Strongly Agree	Strongly Agree	Agree	Agree	Agree	Strongly Agree	Strongly Agree	Strongly Agree	Very unlikely	Interested	Interested	Interested	Interested	Interested	Very Unlikely	Likely	Unlikely	Neither likely nor unlikely	Very Unlikely	Neither likely nor unlikely	No
Yes		Yes- I know someone				Medication (prescription only)			Nutrition as medicine (anti-inflammatory diet)	Supplements (e.g., Chondroitin, Glucosamine)				Yes	NHS (website)		BBC Food (website)	Magazines (e.g., Women's/ Men's Health, Good Housekeeping)						Agree	Agree	Agree		Yes	Agree	Agree	Agree	Agree	Agree	Agree	Agree	Agree													No
Yes	Yes - myself	Yes- I know someone		Exercise & physical activity		Medication (prescription only)	Medication (over the counter)	Physiotherapy						No										Disagree	Disagree	Disagree		No	Neither agree nor disagree	Agree	Agree	Agree	Agree	Neither agree nor disagree	Agree	Agree	Unlikely	Not at all interested	Not at all interested	Not at all interested	Neutral	Not at all interested	Unlikely	Likely	Neither likely nor unlikely	Unlikely	Unlikely	Likely	No
Yes		Yes- I know someone		Exercise & physical activity	Weight management	Medication (prescription only)	Medication (over the counter)	Physiotherapy	Nutrition as medicine (anti-inflammatory diet)	Supplements (e.g., Chondroitin, Glucosamine)	Herbs	Surgery		Yes	NHS (website)	NHS (doctor's advice)	BBC Food (website)	Magazines (e.g., Women's/ Men's Health, Good Housekeeping)	Blogs	A dietitian/ nutritionist	Charities (e.g., Versus Arthritis, Arthritis Action)			Strongly Agree	Strongly Agree	Strongly Agree		Yes	Strongly Agree	Strongly Agree	Strongly Agree	Strongly Agree	Strongly Agree	Strongly Agree	Strongly Agree	Strongly Agree													No
Yes		Yes- I know someone		Exercise & physical activity	Weight management			Physiotherapy				Surgery		No										Neither agree nor disagree	Disagree	Neither agree nor disagree		No	Agree	Agree	Agree	Agree	Neither agree nor disagree	Agree	Agree	Agree													No
Yes		Yes- I know someone				Medication (prescription only)		Physiotherapy				Surgery		No										Disagree	Disagree	Neither agree nor disagree		Yes	Agree	Agree	Agree	Agree	Agree	Agree	Agree	Disagree													No
Yes		Yes- I know someone		Exercise & physical activity	Weight management			Physiotherapy		Supplements (e.g., Chondroitin, Glucosamine)		Surgery		No										Disagree	Disagree	Neither agree nor disagree		Yes	Strongly Agree	Strongly Agree	Neither agree nor disagree	Agree	Neither agree nor disagree	Agree	Agree	Neither agree nor disagree													No
Yes		Yes- I know someone		Exercise & physical activity	Weight management	Medication (prescription only)	Medication (over the counter)	Physiotherapy		Supplements (e.g., Chondroitin, Glucosamine)				Yes	NHS (website)			Magazines (e.g., Women's/ Men's Health, Good Housekeeping)						Disagree	Neither agree nor disagree	Neither agree nor disagree		Yes	Strongly Agree	Strongly Agree	Agree	Agree	Strongly Agree	Strongly Agree	Strongly Agree	Agree													Yes, please explain
Yes		Yes- I know someone		Exercise & physical activity	Weight management									Yes	NHS (website)	NHS (doctor's advice)					Charities (e.g., Versus Arthritis, Arthritis Action)			Disagree	Disagree	Disagree		Yes	Strongly Agree	Strongly Agree	Agree	Disagree	Agree	Agree	Agree	Disagree													No
Yes		Yes- I know someone		Exercise & physical activity	Weight management	Medication (prescription only)	Medication (over the counter)	Physiotherapy	Nutrition as medicine (anti-inflammatory diet)	Supplements (e.g., Chondroitin, Glucosamine)				No										Neither agree nor disagree	Neither agree nor disagree	Agree		Yes	Strongly Agree	Strongly Agree	Disagree	Agree	Agree	Strongly Agree	Strongly Agree	Disagree													No
Yes			No	Exercise & physical activity	Weight management	Medication (prescription only)			Nutrition as medicine (anti-inflammatory diet)					No										Agree	Disagree	Neither agree nor disagree		Yes	Agree	Agree	Agree	Agree	Agree	Agree	Agree	Disagree													No
Yes		Yes- I know someone		Exercise & physical activity	Weight management	Medication (prescription only)			Nutrition as medicine (anti-inflammatory diet)					No										Agree	Disagree	Disagree		Yes	Agree	Agree	Agree	Agree	Agree	Agree	Agree	Disagree													No
Yes	Yes - myself	Yes- I know someone		Exercise & physical activity	Weight management									Yes	NHS (website)									Agree	Agree	Neither agree nor disagree		Yes	Agree	Agree	Neither agree nor disagree	Neither agree nor disagree	Agree	Agree	Agree	Neither agree nor disagree	Likely	Interested	Neutral	Neutral	Neutral	Interested	Likely	Likely	Neither likely nor unlikely	Likely	Very Unlikely	Very Likely	No
Yes		Yes- I know someone		Exercise & physical activity	Weight management	Medication (prescription only)			Nutrition as medicine (anti-inflammatory diet)					No										Neither agree nor disagree	Disagree	Disagree		Yes	Agree	Agree	Agree	Agree	Agree	Agree	Agree	Agree													No
Yes		Yes- I know someone		Exercise & physical activity	Weight management	Medication (prescription only)	Medication (over the counter)	Physiotherapy	Nutrition as medicine (anti-inflammatory diet)			Surgery		Yes	NHS (website)			Magazines (e.g., Women's/ Men's Health, Good Housekeeping)						Disagree	Disagree	Neither agree nor disagree		Yes	Strongly Agree	Agree	Agree	Agree	Agree	Agree	Agree	Agree													Yes, please explain
Yes		Yes- I know someone		Exercise & physical activity			Medication (over the counter)		Nutrition as medicine (anti-inflammatory diet)	Supplements (e.g., Chondroitin, Glucosamine)		Surgery		Yes	NHS (website)							Other	Google search	Agree	Agree	Agree		Yes	Agree	Agree	Agree	Neither agree nor disagree	Agree	Agree	Disagree	Disagree													No
Yes		Yes- I know someone			Weight management	Medication (prescription only)			Nutrition as medicine (anti-inflammatory diet)					No										Neither agree nor disagree	Neither agree nor disagree	Neither agree nor disagree		Yes	Agree	Neither agree nor disagree	Neither agree nor disagree	Strongly Agree	Strongly Agree	Strongly Agree	Strongly Agree	Neither agree nor disagree													No
Yes		Yes- I know someone		Exercise & physical activity	Weight management			Physiotherapy						No										Disagree	Disagree	Agree		Yes	Agree	Agree	Agree	Neither agree nor disagree	Agree	Agree	Neither agree nor disagree	Disagree													No
Yes		Yes- I know someone				Medication (prescription only)						Surgery		Yes		NHS (doctor's advice)								Disagree	Disagree	Disagree		Yes	Agree	Agree	Agree	Neither agree nor disagree	Agree	Agree	Agree	Agree													No
Yes	Yes - myself			Exercise & physical activity	Weight management	Medication (prescription only)		Physiotherapy						No										Agree	Disagree	Neither agree nor disagree		Yes	Agree	Agree	Neither agree nor disagree	Disagree	Disagree	Agree	Agree	Agree	Neutral	Interested	Interested	Neutral	Neutral	Slightly interested	Unlikely	Neither likely nor unlikely	Unlikely	Neither likely nor unlikely	Neither likely nor unlikely	Unlikely	No
Yes		Yes- I know someone		Exercise & physical activity		Medication (prescription only)		Physiotherapy		Supplements (e.g., Chondroitin, Glucosamine)				No										Disagree	Disagree	Agree		Yes	Agree	Agree	Disagree	Disagree	Disagree	Disagree	Disagree	Neither agree nor disagree													No
Yes		Yes- I know someone		Exercise & physical activity		Medication (prescription only)	Medication (over the counter)	Physiotherapy						No										Stongly Disagree	Stongly Disagree	Stongly Disagree		No	Neither agree nor disagree	Neither agree nor disagree	Agree	Agree	Agree	Agree	Agree	Agree													No
Yes		Yes- I know someone		Exercise & physical activity	Weight management	Medication (prescription only)	Medication (over the counter)	Physiotherapy	Nutrition as medicine (anti-inflammatory diet)	Supplements (e.g., Chondroitin, Glucosamine)		Surgery		Yes	NHS (website)	NHS (doctor's advice)				A dietitian/ nutritionist	Charities (e.g., Versus Arthritis, Arthritis Action)			Strongly Agree	Agree	Neither agree nor disagree		Yes	Strongly Agree	Strongly Agree	Disagree	Neither agree nor disagree	Agree	Strongly Agree	Strongly Agree	Strongly Agree													Yes, please explain
Yes			No	Exercise & physical activity	Weight management	Medication (prescription only)	Medication (over the counter)	Physiotherapy	Nutrition as medicine (anti-inflammatory diet)	Supplements (e.g., Chondroitin, Glucosamine)				No										Disagree	Neither agree nor disagree	Disagree		Yes	Strongly Agree	Agree	Strongly Agree	Agree	Agree	Strongly Agree	Neither agree nor disagree	Neither agree nor disagree													No
Yes	Yes - myself			Exercise & physical activity	Weight management	Medication (prescription only)	Medication (over the counter)	Physiotherapy						No										Stongly Disagree	Stongly Disagree	Stongly Disagree		Yes	Strongly Agree	Strongly Agree	Disagree	Agree	Strongly Agree	Strongly Agree	Strongly Agree	Strongly Agree	Very unlikely	Very interested	Very interested	Neutral	Interested	Very interested	Neither likely nor unlikely	Very Likely	Neither likely nor unlikely	Neither likely nor unlikely	Unlikely	Very Likely	No
Yes		Yes- I know someone		Exercise & physical activity	Weight management	Medication (prescription only)		Physiotherapy	Nutrition as medicine (anti-inflammatory diet)			Surgery		No										Disagree	Disagree	Disagree		Yes	Agree	Strongly Agree	Agree	Agree	Agree	Agree	Agree	Agree													Yes, please explain
Yes	Yes - myself			Exercise & physical activity		Medication (prescription only)	Medication (over the counter)		Nutrition as medicine (anti-inflammatory diet)			Surgery		No										Neither agree nor disagree	Agree	Neither agree nor disagree		No	Agree	Neither agree nor disagree	Agree	Agree	Neither agree nor disagree	Neither agree nor disagree	Neither agree nor disagree	Agree	Unlikely	Slightly interested	Neutral	Neutral	Interested	Neutral	Neither likely nor unlikely	Likely	Unlikely	Likely	Very Unlikely	Neither likely nor unlikely	No
Yes		Yes- I know someone		Exercise & physical activity	Weight management	Medication (prescription only)	Medication (over the counter)	Physiotherapy		Supplements (e.g., Chondroitin, Glucosamine)		Surgery		No										Stongly Disagree	Stongly Disagree	Disagree		No	Agree	Agree	Agree	Agree	Agree	Agree	Agree	Neither agree nor disagree													No
Yes		Yes- I know someone		Exercise & physical activity	Weight management	Medication (prescription only)		Physiotherapy		Supplements (e.g., Chondroitin, Glucosamine)				No										Neither agree nor disagree	Agree	Strongly Agree		Yes	Strongly Agree	Strongly Agree	Strongly Agree	Strongly Agree	Strongly Agree	Strongly Agree	Strongly Agree	Agree													No
Yes	Yes - myself			Exercise & physical activity	Weight management			Physiotherapy		Supplements (e.g., Chondroitin, Glucosamine)		Surgery		No										Disagree	Stongly Disagree	Disagree		Yes	Strongly Agree	Strongly Agree	Strongly Agree	Disagree	Strongly Agree	Neither agree nor disagree	Agree	Agree	Very unlikely	Very interested	Very interested	Very interested	Very interested	Very interested	Neither likely nor unlikely	Very Likely	Unlikely	Neither likely nor unlikely	Neither likely nor unlikely	Neither likely nor unlikely	No
Yes		Yes- I know someone		Exercise & physical activity	Weight management	Medication (prescription only)		Physiotherapy	Nutrition as medicine (anti-inflammatory diet)	Supplements (e.g., Chondroitin, Glucosamine)		Surgery		Yes	NHS (website)					A dietitian/ nutritionist		Other		Agree	Agree	Agree		Yes	Agree	Agree	Neither agree nor disagree	Agree	Agree	Agree	Agree	Neither agree nor disagree													No
Yes			No	Exercise & physical activity	Weight management	Medication (prescription only)								No										Disagree	Stongly Disagree	Stongly Disagree		Yes	Agree	Neither agree nor disagree	Neither agree nor disagree	Disagree	Agree	Agree	Agree	Agree													No
Yes		Yes- I know someone			Weight management		Medication (over the counter)							No										Disagree	Disagree	Disagree		Yes	Agree	Strongly Agree	Agree	Agree	Strongly Agree	Strongly Agree	Agree	Neither agree nor disagree													No
Yes	Yes - myself			Exercise & physical activity	Weight management					Supplements (e.g., Chondroitin, Glucosamine)		Surgery		Yes	NHS (website)	NHS (doctor's advice)			Blogs					Disagree	Disagree	Disagree		Yes	Neither agree nor disagree	Stongly Disagree	Strongly Agree	Strongly Agree	Strongly Agree	Agree	Neither agree nor disagree	Neither agree nor disagree	Unlikely	Interested	Interested	Interested	Interested	Slightly interested	Very Unlikely	Unlikely	Very Unlikely	Unlikely	Very Unlikely	Unlikely	Yes, please explain
Yes	Yes - myself			Exercise & physical activity	Weight management	Medication (prescription only)	Medication (over the counter)					Surgery		No										Neither agree nor disagree	Neither agree nor disagree	Disagree		No	Agree	Agree	Agree	Agree	Agree	Agree	Agree	Agree	Unlikely	Neutral	Neutral	Neutral	Neutral	Neutral	Neither likely nor unlikely	Neither likely nor unlikely	Neither likely nor unlikely	Unlikely	Unlikely	Neither likely nor unlikely	No
Yes		Yes- I know someone			Weight management	Medication (prescription only)		Physiotherapy				Surgery		No										Disagree	Disagree	Disagree		Yes	Strongly Agree	Strongly Agree	Agree	Agree	Agree	Agree	Agree	Strongly Agree													No
Yes		Yes- I know someone		Exercise & physical activity	Weight management	Medication (prescription only)				Supplements (e.g., Chondroitin, Glucosamine)				No										Disagree	Disagree	Neither agree nor disagree		No	Agree	Agree	Agree	Agree	Agree	Agree	Neither agree nor disagree	Disagree													No
Yes		Yes- I know someone			Weight management	Medication (prescription only)		Physiotherapy		Supplements (e.g., Chondroitin, Glucosamine)				Yes	NHS (website)							Other	Google search of everything!	Stongly Disagree	Disagree	Strongly Agree		Yes	Neither agree nor disagree	Agree	Disagree	Disagree	Strongly Agree	Agree	Agree	Neither agree nor disagree													No
Yes		Yes- I know someone		Exercise & physical activity		Medication (prescription only)			Nutrition as medicine (anti-inflammatory diet)					No										Disagree	Disagree	Stongly Disagree		No	Strongly Agree	Strongly Agree	Agree	Strongly Agree	Strongly Agree	Agree	Agree	Strongly Agree													No
Yes			No	Exercise & physical activity	Weight management	Medication (prescription only)		Physiotherapy	Nutrition as medicine (anti-inflammatory diet)			Surgery		Yes	NHS (website)		BBC Food (website)		Blogs					Neither agree nor disagree	Agree	Disagree		Yes	Agree	Agree	Disagree	Agree	Agree	Agree	Agree	Agree													No
Yes	Yes - myself			Exercise & physical activity			Medication (over the counter)	Physiotherapy		Supplements (e.g., Chondroitin, Glucosamine)				No										Disagree	Disagree	Disagree		Yes	Neither agree nor disagree	Agree	Neither agree nor disagree	Neither agree nor disagree	Agree	Disagree	Neither agree nor disagree	Disagree	Unlikely	Not at all interested	Not at all interested	Not at all interested	Not at all interested	Not at all interested	Unlikely	Neither likely nor unlikely	Unlikely	Neither likely nor unlikely	Unlikely	Neither likely nor unlikely	No
Yes			No	Exercise & physical activity								Surgery		No										Stongly Disagree	Stongly Disagree	Neither agree nor disagree		Yes	Strongly Agree	Strongly Agree	Neither agree nor disagree	Neither agree nor disagree	Neither agree nor disagree	Agree	Agree	Neither agree nor disagree													No
Yes			No	Exercise & physical activity		Medication (prescription only)		Physiotherapy						No										Stongly Disagree	Stongly Disagree	Disagree		Yes	Agree	Strongly Agree	Agree	Agree	Strongly Agree	Strongly Agree	Strongly Agree	Neither agree nor disagree													No
Yes		Yes- I know someone		Exercise & physical activity		Medication (prescription only)		Physiotherapy						No										Neither agree nor disagree	Disagree	Disagree		Yes	Agree	Agree	Neither agree nor disagree	Neither agree nor disagree	Agree	Agree	Agree	Neither agree nor disagree													Yes, please explain
Yes	Yes - myself	Yes- I know someone		Exercise & physical activity	Weight management	Medication (prescription only)	Medication (over the counter)	Physiotherapy	Nutrition as medicine (anti-inflammatory diet)	Supplements (e.g., Chondroitin, Glucosamine)		Surgery		No										Neither agree nor disagree	Disagree	Disagree		Yes	Agree	Neither agree nor disagree	Neither agree nor disagree	Agree	Agree	Agree	Agree	Agree	Neutral	Slightly interested	Neutral	Neutral	Neutral	Neutral	Neither likely nor unlikely	Likely	Unlikely	Neither likely nor unlikely	Unlikely	Likely	No
Yes	Yes - myself	Yes- I know someone		Exercise & physical activity	Weight management	Medication (prescription only)	Medication (over the counter)	Physiotherapy	Nutrition as medicine (anti-inflammatory diet)	Supplements (e.g., Chondroitin, Glucosamine)	Herbs	Surgery		No										Disagree	Neither agree nor disagree	Disagree		Yes	Agree	Agree	Agree	Agree	Agree	Agree	Agree	Agree	Unlikely	Interested	Interested	Interested	Interested	Interested	Likely	Likely	Neither likely nor unlikely	Likely	Unlikely	Neither likely nor unlikely	Yes, please explain
Yes			No			Medication (prescription only)		Physiotherapy						No										Disagree	Disagree	Disagree		No	Agree	Agree	Agree	Agree	Agree	Agree	Agree	Agree													No
Yes	Yes - myself	Yes- I know someone		Exercise & physical activity	Weight management				Nutrition as medicine (anti-inflammatory diet)	Supplements (e.g., Chondroitin, Glucosamine)				Yes			BBC Food (website)		Blogs	A dietitian/ nutritionist				Agree	Neither agree nor disagree	Agree		Yes	Agree	Agree	Disagree	Disagree	Agree	Agree	Agree	Disagree	Very likely	Interested	Interested	Interested	Neutral	Neutral	Unlikely	Neither likely nor unlikely	Unlikely	Likely	Unlikely	Neither likely nor unlikely	No
Yes		Yes- I know someone			Weight management	Medication (prescription only)		Physiotherapy	Nutrition as medicine (anti-inflammatory diet)	Supplements (e.g., Chondroitin, Glucosamine)				No										Disagree	Disagree	Neither agree nor disagree		No	Neither agree nor disagree	Disagree	Agree	Disagree	Agree	Agree	Neither agree nor disagree	Neither agree nor disagree													No
Yes	Yes - myself			Exercise & physical activity	Weight management	Medication (prescription only)	Medication (over the counter)	Physiotherapy	Nutrition as medicine (anti-inflammatory diet)	Supplements (e.g., Chondroitin, Glucosamine)		Surgery		Yes	NHS (website)	NHS (doctor's advice)	BBC Food (website)	Magazines (e.g., Women's/ Men's Health, Good Housekeeping)	Blogs	A dietitian/ nutritionist	Charities (e.g., Versus Arthritis, Arthritis Action)	Other	Osteopathy treatment	Agree	Agree	Neither agree nor disagree		Yes	Strongly Agree	Strongly Agree	Strongly Agree	Strongly Agree	Strongly Agree	Strongly Agree	Strongly Agree	Strongly Agree	Unlikely	Interested	Interested	Interested	Interested	Neutral	Likely	Very Likely	Neither likely nor unlikely	Likely	Unlikely	Likely	No
Yes		Yes- I know someone	No										None of the above	No										Stongly Disagree	Disagree	Disagree		No	Neither agree nor disagree	Agree	Agree	Agree	Neither agree nor disagree	Disagree	Neither agree nor disagree	Agree													No
Yes		Yes- I know someone				Medication (prescription only)								No										Agree	Agree	Agree		Yes	Strongly Agree	Agree	Agree	Neither agree nor disagree	Agree	Agree	Neither agree nor disagree	Neither agree nor disagree													No
Yes		Yes- I know someone		Exercise & physical activity	Weight management	Medication (prescription only)		Physiotherapy	Nutrition as medicine (anti-inflammatory diet)			Surgery		No										Disagree	Disagree	Neither agree nor disagree		Yes	Strongly Agree	Strongly Agree	Agree	Agree	Agree	Agree	Disagree	Neither agree nor disagree													Yes, please explain
Yes		Yes- I know someone		Exercise & physical activity		Medication (prescription only)		Physiotherapy						Yes					Blogs			Other	youtube	Agree	Agree	Agree		Yes	Agree	Neither agree nor disagree	Neither agree nor disagree	Agree	Agree	Agree	Agree	Neither agree nor disagree													No
Yes		Yes- I know someone		Exercise & physical activity	Weight management	Medication (prescription only)	Medication (over the counter)	Physiotherapy			Herbs	Surgery		No										Neither agree nor disagree	Disagree	Disagree		Yes	Agree	Strongly Agree	Agree	Strongly Agree	Agree	Agree	Agree	Strongly Agree													No
Yes		Yes- I know someone		Exercise & physical activity		Medication (prescription only)								No										Disagree	Disagree	Stongly Disagree		No	Neither agree nor disagree	Agree	Agree	Agree	Neither agree nor disagree	Neither agree nor disagree	Agree	Neither agree nor disagree													Yes, please explain
Yes			No	Exercise & physical activity	Weight management		Medication (over the counter)	Physiotherapy		Supplements (e.g., Chondroitin, Glucosamine)		Surgery		No										Neither agree nor disagree	Disagree	Agree		Yes	Neither agree nor disagree	Strongly Agree	Strongly Agree	Strongly Agree	Strongly Agree	Strongly Agree	Strongly Agree	Agree													No
Yes	Yes - myself			Exercise & physical activity	Weight management		Medication (over the counter)	Physiotherapy		Supplements (e.g., Chondroitin, Glucosamine)				No										Disagree	Disagree	Disagree		Yes	Agree	Agree	Agree	Agree	Agree	Agree	Agree	Neither agree nor disagree	Unlikely	Interested	Interested	Neutral	Interested	Interested	Unlikely	Neither likely nor unlikely	Neither likely nor unlikely	Neither likely nor unlikely	Neither likely nor unlikely	Neither likely nor unlikely	No
Yes			No										None of the above	No										Disagree	Disagree	Neither agree nor disagree		Yes	Agree	Agree	Disagree	Agree	Agree	Agree	Agree	Neither agree nor disagree													No
Yes	Yes - myself			Exercise & physical activity	Weight management	Medication (prescription only)	Medication (over the counter)	Physiotherapy	Nutrition as medicine (anti-inflammatory diet)			Surgery		No										Neither agree nor disagree	Neither agree nor disagree	Disagree		Yes	Agree	Agree	Agree	Agree	Agree	Agree	Neither agree nor disagree	Agree	Very unlikely	Interested	Interested	Interested	Interested	Neutral	Neither likely nor unlikely	Likely	Neither likely nor unlikely	Likely	Neither likely nor unlikely	Unlikely	No
Yes		Yes- I know someone		Exercise & physical activity			Medication (over the counter)	Physiotherapy				Surgery		No										Neither agree nor disagree	Neither agree nor disagree	Agree		No	Agree	Agree	Agree	Agree	Agree	Agree	Agree	Neither agree nor disagree													No
Yes		Yes- I know someone		Exercise & physical activity	Weight management	Medication (prescription only)	Medication (over the counter)	Physiotherapy	Nutrition as medicine (anti-inflammatory diet)					No										Agree	Stongly Disagree	Agree		No	Agree	Strongly Agree	Agree	Agree	Neither agree nor disagree	Strongly Agree	Agree	Disagree													Yes, please explain
Yes		Yes- I know someone		Exercise & physical activity	Weight management			Physiotherapy	Nutrition as medicine (anti-inflammatory diet)					No										Agree	Agree	Agree		No	Agree	Agree	Agree	Strongly Agree	Neither agree nor disagree	Agree	Neither agree nor disagree	Neither agree nor disagree													No
Yes		Yes- I know someone			Weight management	Medication (prescription only)	Medication (over the counter)		Nutrition as medicine (anti-inflammatory diet)	Supplements (e.g., Chondroitin, Glucosamine)				No										Disagree	Disagree	Disagree		No	Agree	Strongly Agree	Agree	Strongly Agree	Strongly Agree	Strongly Agree	Strongly Agree	Agree													No
Yes	Yes - myself			Exercise & physical activity			Medication (over the counter)					Surgery		Yes	NHS (website)									Strongly Agree	Agree	Neither agree nor disagree		Yes	Agree	Strongly Agree	Agree	Strongly Agree	Agree	Disagree	Neither agree nor disagree	Agree	Very likely	Interested	Slightly interested	Neutral	Interested	Slightly interested	Likely	Unlikely	Likely	Very Unlikely	Neither likely nor unlikely	Likely	No
Yes		Yes- I know someone		Exercise & physical activity		Medication (prescription only)	Medication (over the counter)	Physiotherapy	Nutrition as medicine (anti-inflammatory diet)					Yes	NHS (website)				Blogs		Charities (e.g., Versus Arthritis, Arthritis Action)			Disagree	Disagree	Disagree		Yes	Agree	Agree	Neither agree nor disagree	Neither agree nor disagree	Agree	Agree	Agree	Agree													No
Yes		Yes- I know someone		Exercise & physical activity	Weight management	Medication (prescription only)	Medication (over the counter)	Physiotherapy	Nutrition as medicine (anti-inflammatory diet)	Supplements (e.g., Chondroitin, Glucosamine)				Yes	NHS (website)	NHS (doctor's advice)								Agree	Agree	Agree		Yes	Agree	Agree	Agree	Agree	Agree	Agree	Strongly Agree	Neither agree nor disagree													No
Yes		Yes- I know someone		Exercise & physical activity	Weight management	Medication (prescription only)		Physiotherapy						No										Stongly Disagree	Stongly Disagree	Stongly Disagree		Yes	Strongly Agree	Strongly Agree	Strongly Agree	Strongly Agree	Strongly Agree	Strongly Agree	Agree	Agree													No
Yes	Yes - myself	Yes- I know someone		Exercise & physical activity	Weight management									No										Disagree	Disagree	Neither agree nor disagree		Yes	Agree	Agree	Agree	Agree	Agree	Agree	Agree	Disagree	Neutral	Neutral	Not at all interested	Slightly interested	Neutral	Neutral	Likely	Likely	Neither likely nor unlikely	Neither likely nor unlikely	Very Unlikely	Neither likely nor unlikely	No
Yes	Yes - myself			Exercise & physical activity						Supplements (e.g., Chondroitin, Glucosamine)				No										Disagree	Disagree	Disagree		Yes	Agree	Agree	Neither agree nor disagree	Neither agree nor disagree	Agree	Agree	Agree	Neither agree nor disagree	Unlikely	Neutral	Neutral	Neutral	Interested	Not at all interested	Unlikely	Likely	Unlikely	Unlikely	Unlikely	Unlikely	No
Yes	Yes - myself			Exercise & physical activity	Weight management	Medication (prescription only)	Medication (over the counter)	Physiotherapy	Nutrition as medicine (anti-inflammatory diet)	Supplements (e.g., Chondroitin, Glucosamine)		Surgery		Yes	NHS (website)	NHS (doctor's advice)			Blogs					Neither agree nor disagree	Neither agree nor disagree	Agree		Yes	Agree	Agree	Neither agree nor disagree	Neither agree nor disagree	Agree	Agree	Agree	Strongly Agree	Neutral	Not at all interested	Not at all interested	Not at all interested	Not at all interested	Not at all interested	Very Likely	Unlikely	Very Unlikely	Likely	Neither likely nor unlikely	Neither likely nor unlikely	No
Yes	Yes - myself			Exercise & physical activity	Weight management	Medication (prescription only)	Medication (over the counter)	Physiotherapy	Nutrition as medicine (anti-inflammatory diet)	Supplements (e.g., Chondroitin, Glucosamine)		Surgery		Yes	NHS (website)	NHS (doctor's advice)						Other	X	Agree	Agree	Agree		Yes	Neither agree nor disagree	Neither agree nor disagree	Neither agree nor disagree	Neither agree nor disagree	Agree	Agree	Agree	Agree	Likely	Interested	Very interested	Interested	Interested	Interested	Neither likely nor unlikely	Neither likely nor unlikely	Neither likely nor unlikely	Neither likely nor unlikely	Neither likely nor unlikely	Neither likely nor unlikely	No
Yes	Yes - myself			Exercise & physical activity	Weight management				Nutrition as medicine (anti-inflammatory diet)	Supplements (e.g., Chondroitin, Glucosamine)		Surgery		Yes	NHS (website)	NHS (doctor's advice)								Agree	Agree	Neither agree nor disagree		No	Agree	Agree	Neither agree nor disagree	Neither agree nor disagree	Agree	Neither agree nor disagree	Neither agree nor disagree	Strongly Agree	Neutral	Not at all interested	Not at all interested	Not at all interested	Not at all interested	Not at all interested	Unlikely	Neither likely nor unlikely	Unlikely	Likely	Very Unlikely	Likely	No
Yes		Yes- I know someone		Exercise & physical activity	Weight management	Medication (prescription only)								No										Stongly Disagree	Stongly Disagree	Stongly Disagree		Yes	Strongly Agree	Disagree	Strongly Agree	Strongly Agree	Strongly Agree	Agree	Neither agree nor disagree	Neither agree nor disagree													Yes, please explain
Yes		Yes- I know someone			Weight management		Medication (over the counter)							No										Neither agree nor disagree	Disagree	Disagree		No	Agree	Strongly Agree	Agree	Agree	Agree	Agree	Agree	Agree													No
Yes	Yes - myself			Exercise & physical activity		Medication (prescription only)			Nutrition as medicine (anti-inflammatory diet)			Surgery		No										Disagree	Disagree	Neither agree nor disagree		No	Neither agree nor disagree	Agree	Agree	Neither agree nor disagree	Agree	Agree	Strongly Agree	Agree	Very unlikely	Neutral	Interested	Interested	Neutral	Slightly interested	Unlikely	Likely	Likely	Neither likely nor unlikely	Very Unlikely	Likely	No
Yes	Yes - myself			Exercise & physical activity	Weight management	Medication (prescription only)		Physiotherapy		Supplements (e.g., Chondroitin, Glucosamine)		Surgery		Yes	NHS (website)	NHS (doctor's advice)				A dietitian/ nutritionist				Disagree	Disagree	Disagree		Yes	Strongly Agree	Strongly Agree	Agree	Neither agree nor disagree	Strongly Agree	Disagree	Agree	Neither agree nor disagree	Very likely	Neutral	Slightly interested	Interested	Slightly interested	Slightly interested	Neither likely nor unlikely	Likely	Very Unlikely	Very Likely	Very Unlikely	Neither likely nor unlikely	No
Yes	Yes - myself			Exercise & physical activity	Weight management		Medication (over the counter)	Physiotherapy		Supplements (e.g., Chondroitin, Glucosamine)		Surgery		No										Stongly Disagree	Stongly Disagree	Stongly Disagree		Yes	Agree	Agree	Agree	Agree	Agree	Agree	Agree	Agree	Very unlikely	Interested	Neutral	Neutral	Interested	Interested	Likely	Very Likely	Unlikely	Unlikely	Unlikely	Likely	No
Yes			No	Exercise & physical activity	Weight management	Medication (prescription only)		Physiotherapy						Yes	NHS (website)	NHS (doctor's advice)								Neither agree nor disagree	Agree	Neither agree nor disagree		Yes	Agree	Neither agree nor disagree	Agree	Disagree	Agree	Agree	Neither agree nor disagree	Agree													No
Yes		Yes- I know someone				Medication (prescription only)				Supplements (e.g., Chondroitin, Glucosamine)		Surgery		No										Disagree	Disagree	Agree		Yes	Agree	Agree	Agree	Disagree	Agree	Agree	Agree	Neither agree nor disagree													No
Yes		Yes- I know someone		Exercise & physical activity	Weight management	Medication (prescription only)		Physiotherapy	Nutrition as medicine (anti-inflammatory diet)	Supplements (e.g., Chondroitin, Glucosamine)		Surgery		No										Agree	Agree	Agree		Yes	Strongly Agree	Strongly Agree	Strongly Agree	Strongly Agree	Strongly Agree	Agree	Agree	Agree													No
Yes	Yes - myself			Exercise & physical activity	Weight management	Medication (prescription only)	Medication (over the counter)	Physiotherapy	Nutrition as medicine (anti-inflammatory diet)	Supplements (e.g., Chondroitin, Glucosamine)	Herbs	Surgery		Yes	NHS (website)	NHS (doctor's advice)	BBC Food (website)	Magazines (e.g., Women's/ Men's Health, Good Housekeeping)	Blogs					Agree	Agree	Agree		Yes	Strongly Agree	Agree	Strongly Agree	Agree	Neither agree nor disagree	Neither agree nor disagree	Agree	Agree	Neutral	Interested	Interested	Interested	Interested	Neutral	Very Likely	Likely	Likely	Likely	Likely	Very Likely	No
Yes		Yes- I know someone		Exercise & physical activity	Weight management	Medication (prescription only)	Medication (over the counter)		Nutrition as medicine (anti-inflammatory diet)	Supplements (e.g., Chondroitin, Glucosamine)				Yes					Blogs			Other	Google search	Agree	Agree	Agree		Yes	Strongly Agree	Strongly Agree	Agree	Agree	Strongly Agree	Strongly Agree	Agree	Neither agree nor disagree													No
Yes		Yes- I know someone				Medication (prescription only)		Physiotherapy				Surgery		No										Disagree	Disagree	Disagree		Yes	Agree	Agree	Agree	Agree	Agree	Agree	Agree	Agree													No
Yes			No	Exercise & physical activity	Weight management	Medication (prescription only)				Supplements (e.g., Chondroitin, Glucosamine)		Surgery		No										Stongly Disagree	Stongly Disagree	Stongly Disagree		No	Strongly Agree	Strongly Agree	Agree	Strongly Agree	Agree	Neither agree nor disagree	Disagree	Stongly Disagree													No
Yes		Yes- I know someone		Exercise & physical activity	Weight management	Medication (prescription only)		Physiotherapy		Supplements (e.g., Chondroitin, Glucosamine)				Yes	NHS (website)				Blogs					Agree	Agree	Strongly Agree		Yes	Agree	Neither agree nor disagree	Disagree	Neither agree nor disagree	Agree	Agree	Neither agree nor disagree	Neither agree nor disagree													No
Yes			No	Exercise & physical activity	Weight management									No										Disagree	Agree	Strongly Agree		Yes	Agree	Agree	Agree	Agree	Agree	Strongly Agree	Agree	Agree													No
Yes		Yes- I know someone		Exercise & physical activity	Weight management	Medication (prescription only)		Physiotherapy	Nutrition as medicine (anti-inflammatory diet)					Yes	NHS (website)						Charities (e.g., Versus Arthritis, Arthritis Action)	Other	Online search	Neither agree nor disagree	Agree	Agree		Yes	Strongly Agree	Strongly Agree	Neither agree nor disagree	Agree	Agree	Neither agree nor disagree	Strongly Agree	Disagree													No
Yes		Yes- I know someone		Exercise & physical activity		Medication (prescription only)	Medication (over the counter)		Nutrition as medicine (anti-inflammatory diet)	Supplements (e.g., Chondroitin, Glucosamine)				No										Agree	Agree	Agree		Yes	Agree	Agree	Agree	Agree	Agree	Agree	Agree	Agree													No
Yes	Yes - myself			Exercise & physical activity	Weight management			Physiotherapy		Supplements (e.g., Chondroitin, Glucosamine)		Surgery		Yes	NHS (website)							Other		Neither agree nor disagree	Agree	Neither agree nor disagree		Yes	Agree	Strongly Agree	Agree	Strongly Agree	Strongly Agree	Strongly Agree	Strongly Agree	Strongly Agree	Unlikely	Very interested	Interested	Very interested	Very interested	Interested	Neither likely nor unlikely	Very Likely	Unlikely	Neither likely nor unlikely	Neither likely nor unlikely	Neither likely nor unlikely	No
Yes	Yes - myself	Yes- I know someone		Exercise & physical activity			Medication (over the counter)	Physiotherapy						Yes	NHS (website)				Blogs					Agree	Agree	Agree		Yes	Agree	Strongly Agree	Disagree	Agree	Agree	Strongly Agree	Agree	Neither agree nor disagree	Likely	Very interested	Interested	Interested	Very interested	Interested	Unlikely	Unlikely	Very Unlikely	Unlikely	Very Unlikely	Unlikely	No
Yes		Yes- I know someone				Medication (prescription only)	Medication (over the counter)	Physiotherapy		Supplements (e.g., Chondroitin, Glucosamine)				Yes					Blogs					Neither agree nor disagree	Disagree	Disagree		Yes	Strongly Agree	Strongly Agree	Disagree	Disagree	Strongly Agree	Strongly Agree	Strongly Agree	Neither agree nor disagree													No
Yes			No										None of the above	No										Stongly Disagree	Stongly Disagree	Stongly Disagree		No	Disagree	Agree	Neither agree nor disagree	Agree	Stongly Disagree	Neither agree nor disagree	Agree	Disagree													Yes, please explain
Yes	Yes - myself			Exercise & physical activity	Weight management	Medication (prescription only)	Medication (over the counter)	Physiotherapy	Nutrition as medicine (anti-inflammatory diet)	Supplements (e.g., Chondroitin, Glucosamine)		Surgery		No										Agree	Agree	Agree		Yes	Agree	Agree	Neither agree nor disagree	Neither agree nor disagree	Neither agree nor disagree	Agree	Agree	Agree	Likely	Interested	Interested	Neutral	Interested	Neutral	Neither likely nor unlikely	Likely	Likely	Neither likely nor unlikely	Unlikely	Likely	No
Yes	Yes - myself			Exercise & physical activity	Weight management	Medication (prescription only)	Medication (over the counter)	Physiotherapy		Supplements (e.g., Chondroitin, Glucosamine)		Surgery		No										Disagree	Disagree	Disagree		Yes	Agree	Neither agree nor disagree	Agree	Neither agree nor disagree	Neither agree nor disagree	Agree	Neither agree nor disagree	Neither agree nor disagree	Unlikely	Interested	Slightly interested	Slightly interested	Neutral	Slightly interested	Neither likely nor unlikely	Very Likely	Neither likely nor unlikely	Unlikely	Very Unlikely	Likely	No
Yes		Yes- I know someone		Exercise & physical activity	Weight management	Medication (prescription only)				Supplements (e.g., Chondroitin, Glucosamine)		Surgery		No										Neither agree nor disagree	Disagree	Agree		No	Neither agree nor disagree	Disagree	Neither agree nor disagree	Neither agree nor disagree	Disagree	Disagree	Neither agree nor disagree	Disagree													No
Yes	Yes - myself			Exercise & physical activity		Medication (prescription only)		Physiotherapy						No										Disagree	Disagree	Disagree		Yes	Agree	Strongly Agree	Agree	Agree	Agree	Agree	Neither agree nor disagree	Disagree	Very unlikely	Interested	Interested	Interested	Very interested	Interested	Likely	Very Likely	Likely	Likely	Unlikely	Very Unlikely	Yes, please explain
Yes	Yes - myself			Exercise & physical activity	Weight management	Medication (prescription only)	Medication (over the counter)	Physiotherapy						No										Disagree	Disagree	Stongly Disagree		Yes	Strongly Agree	Agree	Neither agree nor disagree	Stongly Disagree	Agree	Strongly Agree	Strongly Agree	Neither agree nor disagree	Very unlikely	Interested	Neutral	Interested	Neutral	Slightly interested	Neither likely nor unlikely	Very Likely	Very Unlikely	Very Unlikely	Very Unlikely	Very Unlikely	No
Yes		Yes- I know someone		Exercise & physical activity					Nutrition as medicine (anti-inflammatory diet)					No										Stongly Disagree	Stongly Disagree	Stongly Disagree		Yes	Neither agree nor disagree	Neither agree nor disagree	Neither agree nor disagree	Agree	Agree	Agree	Neither agree nor disagree	Neither agree nor disagree													No
Yes	Yes - myself			Exercise & physical activity	Weight management	Medication (prescription only)		Physiotherapy						No										Neither agree nor disagree	Neither agree nor disagree	Disagree		Yes	Strongly Agree	Strongly Agree	Agree	Strongly Agree	Strongly Agree	Strongly Agree	Strongly Agree	Strongly Agree	Unlikely	Interested	Interested	Very interested	Very interested	Interested	Likely	Very Likely	Very Likely	Likely	Likely	Very Likely	No
Yes	Yes - myself			Exercise & physical activity	Weight management	Medication (prescription only)		Physiotherapy		Supplements (e.g., Chondroitin, Glucosamine)		Surgery		No										Disagree	Disagree	Disagree		Yes	Agree	Neither agree nor disagree	Stongly Disagree	Stongly Disagree	Neither agree nor disagree	Agree	Neither agree nor disagree	Neither agree nor disagree	Unlikely	Not at all interested	Not at all interested	Not at all interested	Not at all interested	Not at all interested	Unlikely	Likely	Unlikely	Likely	Very Unlikely	Unlikely	No
Yes			No	Exercise & physical activity										No										Disagree	Agree	Disagree		Yes	Agree	Agree	Neither agree nor disagree	Neither agree nor disagree	Agree	Agree	Agree	Neither agree nor disagree													No
Yes		Yes- I know someone			Weight management	Medication (prescription only)	Medication (over the counter)	Physiotherapy	Nutrition as medicine (anti-inflammatory diet)					No										Disagree	Disagree	Neither agree nor disagree		No	Agree	Agree	Agree	Strongly Agree	Strongly Agree	Neither agree nor disagree	Neither agree nor disagree	Disagree													No
Yes			No	Exercise & physical activity	Weight management	Medication (prescription only)	Medication (over the counter)	Physiotherapy						No										Disagree	Disagree	Disagree		Yes	Agree	Agree	Agree	Agree	Agree	Agree	Agree	Neither agree nor disagree													No
Yes	Yes - myself			Exercise & physical activity	Weight management	Medication (prescription only)	Medication (over the counter)	Physiotherapy	Nutrition as medicine (anti-inflammatory diet)					Yes	NHS (website)		BBC Food (website)			A dietitian/ nutritionist				Agree	Agree	Strongly Agree		Yes	Agree	Agree	Strongly Agree	Neither agree nor disagree	Neither agree nor disagree	Strongly Agree	Strongly Agree	Neither agree nor disagree	Very likely	Very interested	Interested	Interested	Very interested	Interested	Likely	Likely	Very Likely	Very Likely	Neither likely nor unlikely	Likely	No
Yes	Yes - myself	Yes- I know someone		Exercise & physical activity			Medication (over the counter)		Nutrition as medicine (anti-inflammatory diet)	Supplements (e.g., Chondroitin, Glucosamine)				Yes			BBC Food (website)		Blogs	A dietitian/ nutritionist				Agree	Agree	Agree		Yes	Strongly Agree	Agree	Disagree	Neither agree nor disagree	Agree	Agree	Agree	Disagree	Likely	Interested	Interested	Interested	Interested	Not at all interested	Unlikely	Neither likely nor unlikely	Unlikely	Neither likely nor unlikely	Unlikely	Likely	No
Yes		Yes- I know someone				Medication (prescription only)								No										Disagree	Disagree	Disagree		Yes	Agree	Agree	Agree	Disagree	Disagree	Disagree	Agree	Agree													No
Yes			No	Exercise & physical activity	Weight management					Supplements (e.g., Chondroitin, Glucosamine)	Herbs			No										Agree	Disagree	Agree		Yes	Strongly Agree	Strongly Agree	Strongly Agree	Strongly Agree	Strongly Agree	Strongly Agree	Strongly Agree	Neither agree nor disagree													No
Yes	Yes - myself			Exercise & physical activity	Weight management	Medication (prescription only)	Medication (over the counter)	Physiotherapy	Nutrition as medicine (anti-inflammatory diet)	Supplements (e.g., Chondroitin, Glucosamine)	Herbs	Surgery		Yes	NHS (website)	NHS (doctor's advice)	BBC Food (website)	Magazines (e.g., Women's/ Men's Health, Good Housekeeping)		A dietitian/ nutritionist	Charities (e.g., Versus Arthritis, Arthritis Action)			Agree	Strongly Agree	Agree		Yes	Strongly Agree	Strongly Agree	Disagree	Agree	Strongly Agree	Agree	Agree	Agree	Likely	Interested	Interested	Interested	Very interested	Interested	Likely	Likely	Very Unlikely	Likely	Likely	Very Likely	No
Yes			No	Exercise & physical activity	Weight management	Medication (prescription only)		Physiotherapy		Supplements (e.g., Chondroitin, Glucosamine)				No										Disagree	Disagree	Disagree		Yes	Agree	Agree	Agree	Neither agree nor disagree	Neither agree nor disagree	Agree	Agree	Agree													Yes, please explain
Yes		Yes- I know someone		Exercise & physical activity	Weight management	Medication (prescription only)		Physiotherapy		Supplements (e.g., Chondroitin, Glucosamine)		Surgery		No										Disagree	Disagree	Neither agree nor disagree		Yes	Neither agree nor disagree	Strongly Agree	Agree	Agree	Agree	Strongly Agree	Agree	Agree													Yes, please explain
Yes		Yes- I know someone		Exercise & physical activity	Weight management	Medication (prescription only)	Medication (over the counter)	Physiotherapy	Nutrition as medicine (anti-inflammatory diet)	Supplements (e.g., Chondroitin, Glucosamine)				No										Agree	Stongly Disagree	Disagree		Yes	Agree	Strongly Agree	Agree	Strongly Agree	Strongly Agree	Strongly Agree	Agree	Agree													No
Yes		Yes- I know someone		Exercise & physical activity	Weight management	Medication (prescription only)		Physiotherapy		Supplements (e.g., Chondroitin, Glucosamine)				Yes	NHS (website)	NHS (doctor's advice)								Agree	Agree	Agree		Yes	Strongly Agree	Strongly Agree	Strongly Agree	Agree	Strongly Agree	Strongly Agree	Strongly Agree	Agree													No
Yes		Yes- I know someone		Exercise & physical activity	Weight management	Medication (prescription only)			Nutrition as medicine (anti-inflammatory diet)	Supplements (e.g., Chondroitin, Glucosamine)				No										Agree	Agree	Agree		Yes	Strongly Agree	Strongly Agree	Disagree	Agree	Strongly Agree	Strongly Agree	Strongly Agree	Neither agree nor disagree													No
Yes		Yes- I know someone		Exercise & physical activity		Medication (prescription only)		Physiotherapy						No										Stongly Disagree	Stongly Disagree	Stongly Disagree		No	Neither agree nor disagree	Neither agree nor disagree	Strongly Agree	Strongly Agree	Strongly Agree	Strongly Agree	Strongly Agree	Neither agree nor disagree													No
Yes	Yes - myself			Exercise & physical activity						Supplements (e.g., Chondroitin, Glucosamine)				No										Disagree	Disagree	Disagree		No	Agree	Agree	Agree	Agree	Agree	Agree	Agree	Neither agree nor disagree	Unlikely	Interested	Interested	Interested	Interested	Interested	Neither likely nor unlikely	Likely	Neither likely nor unlikely	Neither likely nor unlikely	Unlikely	Unlikely	No
Yes			No	Exercise & physical activity	Weight management	Medication (prescription only)		Physiotherapy	Nutrition as medicine (anti-inflammatory diet)	Supplements (e.g., Chondroitin, Glucosamine)		Surgery		No										Stongly Disagree	Stongly Disagree	Stongly Disagree		No	Agree	Agree	Agree	Strongly Agree	Strongly Agree	Agree	Agree	Agree													No
Yes			No	Exercise & physical activity		Medication (prescription only)	Medication (over the counter)			Supplements (e.g., Chondroitin, Glucosamine)		Surgery		No										Stongly Disagree	Stongly Disagree	Stongly Disagree		No	Agree	Agree	Neither agree nor disagree	Disagree	Neither agree nor disagree	Neither agree nor disagree	Neither agree nor disagree	Disagree													No
Yes		Yes- I know someone		Exercise & physical activity		Medication (prescription only)				Supplements (e.g., Chondroitin, Glucosamine)		Surgery		No										Neither agree nor disagree	Neither agree nor disagree	Disagree		Yes	Strongly Agree	Strongly Agree	Strongly Agree	Strongly Agree	Strongly Agree	Strongly Agree	Agree	Agree													No
Yes			No	Exercise & physical activity		Medication (prescription only)		Physiotherapy						No										Agree	Agree	Agree		Yes	Agree	Strongly Agree	Agree	Agree	Neither agree nor disagree	Agree	Agree	Disagree													No
Yes			No	Exercise & physical activity		Medication (prescription only)		Physiotherapy		Supplements (e.g., Chondroitin, Glucosamine)				No										Disagree	Disagree	Stongly Disagree		No	Agree	Agree	Agree	Agree	Agree	Agree	Agree	Agree													No
Yes			No	Exercise & physical activity		Medication (prescription only)		Physiotherapy	Nutrition as medicine (anti-inflammatory diet)			Surgery		No										Disagree	Disagree	Neither agree nor disagree		Yes	Agree	Agree	Agree	Agree	Agree	Agree	Agree	Agree													No
Yes	Yes - myself			Exercise & physical activity	Weight management	Medication (prescription only)	Medication (over the counter)	Physiotherapy	Nutrition as medicine (anti-inflammatory diet)	Supplements (e.g., Chondroitin, Glucosamine)		Surgery		Yes	NHS (website)		BBC Food (website)		Blogs	A dietitian/ nutritionist				Disagree	Disagree	Disagree		Yes	Strongly Agree	Neither agree nor disagree	Strongly Agree	Strongly Agree	Agree	Strongly Agree	Neither agree nor disagree	Strongly Agree	Unlikely	Interested	Interested	Interested	Interested	Neutral	Unlikely	Very Likely	Unlikely	Likely	Very Unlikely	Likely	Yes, please explain
Yes	Yes - myself			Exercise & physical activity	Weight management			Physiotherapy						Yes		NHS (doctor's advice)						Other	Physiotherapist	Strongly Agree	Strongly Agree	Strongly Agree		Yes	Strongly Agree	Strongly Agree	Strongly Agree	Strongly Agree	Strongly Agree	Strongly Agree	Strongly Agree	Stongly Disagree	Likely	Neutral	Interested	Neutral	Not at all interested	Not at all interested	Very Unlikely	Very Unlikely	Very Unlikely	Very Unlikely	Very Unlikely	Very Unlikely	No
Yes		Yes- I know someone		Exercise & physical activity	Weight management	Medication (prescription only)	Medication (over the counter)	Physiotherapy	Nutrition as medicine (anti-inflammatory diet)					No										Disagree	Disagree	Neither agree nor disagree		No	Agree	Agree	Strongly Agree	Strongly Agree	Strongly Agree	Strongly Agree	Strongly Agree	Neither agree nor disagree													No
Yes		Yes- I know someone		Exercise & physical activity	Weight management			Physiotherapy	Nutrition as medicine (anti-inflammatory diet)	Supplements (e.g., Chondroitin, Glucosamine)		Surgery		Yes	NHS (website)	NHS (doctor's advice)								Agree	Agree	Agree		Yes	Agree	Neither agree nor disagree	Neither agree nor disagree	Neither agree nor disagree	Agree	Neither agree nor disagree	Agree	Agree													No
Yes			No										None of the above	No										Disagree	Disagree	Disagree		No	Agree	Agree	Agree	Agree	Agree	Agree	Agree	Agree													No
Yes		Yes- I know someone		Exercise & physical activity	Weight management	Medication (prescription only)								No										Neither agree nor disagree	Neither agree nor disagree	Neither agree nor disagree		Yes	Neither agree nor disagree	Neither agree nor disagree	Neither agree nor disagree	Agree	Neither agree nor disagree	Agree	Agree	Neither agree nor disagree													No
Yes		Yes- I know someone					Medication (over the counter)	Physiotherapy				Surgery		No										Stongly Disagree	Stongly Disagree	Disagree		Yes	Agree	Agree	Neither agree nor disagree	Agree	Agree	Agree	Agree	Neither agree nor disagree													No
Yes		Yes- I know someone		Exercise & physical activity	Weight management	Medication (prescription only)		Physiotherapy	Nutrition as medicine (anti-inflammatory diet)	Supplements (e.g., Chondroitin, Glucosamine)		Surgery		No										Disagree	Agree	Neither agree nor disagree		Yes	Agree	Agree	Agree	Agree	Agree	Agree	Agree	Agree													Yes, please explain
Yes	Yes - myself			Exercise & physical activity	Weight management	Medication (prescription only)		Physiotherapy	Nutrition as medicine (anti-inflammatory diet)					No										Disagree	Disagree	Disagree		Yes	Agree	Agree	Neither agree nor disagree	Neither agree nor disagree	Neither agree nor disagree	Neither agree nor disagree	Agree	Neither agree nor disagree	Neutral	Interested	Interested	Interested	Interested	Not at all interested	Unlikely	Likely	Unlikely	Unlikely	Neither likely nor unlikely	Likely	No
Yes	Yes - myself	Yes- I know someone		Exercise & physical activity	Weight management	Medication (prescription only)	Medication (over the counter)	Physiotherapy				Surgery		No										Disagree	Disagree	Disagree		Yes	Neither agree nor disagree	Agree	Agree	Agree	Agree	Agree	Agree	Agree	Unlikely	Very interested	Interested	Very interested	Neutral	Neutral	Likely	Likely	Neither likely nor unlikely	Very Unlikely	Very Unlikely	Very Unlikely	Yes, please explain
Yes		Yes- I know someone		Exercise & physical activity	Weight management	Medication (prescription only)				Supplements (e.g., Chondroitin, Glucosamine)				No										Neither agree nor disagree	Neither agree nor disagree	Disagree		No	Agree	Agree	Disagree	Agree	Agree	Agree	Agree	Disagree													No
Yes		Yes- I know someone		Exercise & physical activity	Weight management			Physiotherapy	Nutrition as medicine (anti-inflammatory diet)					No										Agree	Agree	Agree		Yes	Strongly Agree	Strongly Agree	Strongly Agree	Strongly Agree	Strongly Agree	Strongly Agree	Strongly Agree	Strongly Agree													No
Yes	Yes - myself			Exercise & physical activity	Weight management		Medication (over the counter)							No										Stongly Disagree	Stongly Disagree	Stongly Disagree		No	Neither agree nor disagree	Agree	Neither agree nor disagree	Neither agree nor disagree	Neither agree nor disagree	Agree	Agree	Disagree	Unlikely	Neutral	Neutral	Neutral	Neutral	Not at all interested	Unlikely	Very Likely	Neither likely nor unlikely	Very Likely	Very Unlikely	Likely	Yes, please explain
Yes			No	Exercise & physical activity	Weight management	Medication (prescription only)		Physiotherapy						No										Neither agree nor disagree	Neither agree nor disagree	Agree		Yes	Agree	Strongly Agree	Agree	Agree	Neither agree nor disagree	Agree	Agree	Disagree													No
Yes	Yes - myself							Physiotherapy						No										Disagree	Disagree	Disagree		Yes	Agree	Agree	Agree	Agree	Agree	Agree	Agree	Neither agree nor disagree	Unlikely	Very interested	Very interested	Very interested	Very interested	Very interested	Unlikely	Likely	Likely	Likely	Neither likely nor unlikely	Very Likely	No
Yes		Yes- I know someone		Exercise & physical activity	Weight management	Medication (prescription only)	Medication (over the counter)	Physiotherapy				Surgery		No										Agree	Agree	Agree		No	Agree	Agree	Agree	Agree	Agree	Agree	Agree	Agree													Yes, please explain
Yes		Yes- I know someone			Weight management			Physiotherapy						No										Disagree	Disagree	Disagree		Yes	Agree	Agree	Neither agree nor disagree	Agree	Agree	Agree	Agree	Neither agree nor disagree													Yes, please explain
Yes	Yes - myself			Exercise & physical activity	Weight management	Medication (prescription only)			Nutrition as medicine (anti-inflammatory diet)	Supplements (e.g., Chondroitin, Glucosamine)		Surgery		No										Agree	Disagree	Disagree		Yes	Strongly Agree	Strongly Agree	Agree	Disagree	Strongly Agree	Strongly Agree	Strongly Agree	Agree	Very unlikely	Interested	Slightly interested	Neutral	Interested	Interested	Unlikely	Likely	Unlikely	Likely	Very Unlikely	Unlikely	No
Yes	Yes - myself			Exercise & physical activity	Weight management	Medication (prescription only)		Physiotherapy		Supplements (e.g., Chondroitin, Glucosamine)		Surgery		Yes	NHS (website)	NHS (doctor's advice)								Agree	Agree	Agree		Yes	Strongly Agree	Agree	Neither agree nor disagree	Agree	Agree	Agree	Agree	Agree	Unlikely	Interested	Interested	Neutral	Interested	Neutral	Very Likely	Neither likely nor unlikely	Unlikely	Unlikely	Very Unlikely	Very Likely	No
Yes			No		Weight management	Medication (prescription only)		Physiotherapy	Nutrition as medicine (anti-inflammatory diet)	Supplements (e.g., Chondroitin, Glucosamine)		Surgery		No										Stongly Disagree	Stongly Disagree	Stongly Disagree		No	Strongly Agree	Stongly Disagree	Strongly Agree	Strongly Agree	Agree	Strongly Agree	Strongly Agree	Strongly Agree													No
Yes	Yes - myself	Yes- I know someone		Exercise & physical activity	Weight management	Medication (prescription only)	Medication (over the counter)	Physiotherapy	Nutrition as medicine (anti-inflammatory diet)	Supplements (e.g., Chondroitin, Glucosamine)	Herbs	Surgery		Yes	NHS (website)	NHS (doctor's advice)		Magazines (e.g., Women's/ Men's Health, Good Housekeeping)		A dietitian/ nutritionist	Charities (e.g., Versus Arthritis, Arthritis Action)	Other	Own research	Agree	Agree	Agree		Yes	Strongly Agree	Strongly Agree	Agree	Disagree	Agree	Agree	Agree	Agree	Very likely	Interested	Interested	Interested	Interested	Interested	Likely	Unlikely	Very Unlikely	Unlikely	Unlikely	Unlikely	No
Yes	Yes - myself			Exercise & physical activity	Weight management	Medication (prescription only)	Medication (over the counter)	Physiotherapy		Supplements (e.g., Chondroitin, Glucosamine)	Herbs	Surgery		No										Stongly Disagree	Stongly Disagree	Disagree		Yes	Agree	Agree	Neither agree nor disagree	Strongly Agree	Agree	Neither agree nor disagree	Neither agree nor disagree	Neither agree nor disagree	Unlikely	Interested	Very interested	Neutral	Interested	Interested	Likely	Very Likely	Neither likely nor unlikely	Very Likely	Unlikely	Neither likely nor unlikely	No
Yes		Yes- I know someone		Exercise & physical activity		Medication (prescription only)								No										Stongly Disagree	Stongly Disagree	Neither agree nor disagree		No	Agree	Agree	Strongly Agree	Neither agree nor disagree	Stongly Disagree	Agree	Agree	Agree													No
Yes		Yes- I know someone		Exercise & physical activity	Weight management	Medication (prescription only)								No										Stongly Disagree	Stongly Disagree	Neither agree nor disagree		Yes	Strongly Agree	Strongly Agree	Agree	Agree	Agree	Strongly Agree	Strongly Agree	Agree													Yes, please explain
Yes		Yes- I know someone		Exercise & physical activity	Weight management	Medication (prescription only)								No										Disagree	Disagree	Disagree		No	Agree	Agree	Agree	Agree	Agree	Agree	Agree	Agree													No
Yes			No	Exercise & physical activity		Medication (prescription only)	Medication (over the counter)	Physiotherapy						No										Stongly Disagree	Stongly Disagree	Stongly Disagree		Yes	Strongly Agree	Agree	Disagree	Agree	Disagree	Agree	Disagree	Disagree													No
Yes	Yes - myself	Yes- I know someone		Exercise & physical activity	Weight management	Medication (prescription only)		Physiotherapy		Supplements (e.g., Chondroitin, Glucosamine)		Surgery		No										Disagree	Neither agree nor disagree	Disagree		Yes	Neither agree nor disagree	Agree	Disagree	Disagree	Agree	Agree	Disagree	Neither agree nor disagree	Unlikely	Interested	Neutral	Neutral	Interested	Not at all interested	Unlikely	Likely	Unlikely	Unlikely	Unlikely	Neither likely nor unlikely	No
Yes	Yes - myself	Yes- I know someone		Exercise & physical activity	Weight management	Medication (prescription only)	Medication (over the counter)	Physiotherapy	Nutrition as medicine (anti-inflammatory diet)	Supplements (e.g., Chondroitin, Glucosamine)		Surgery		Yes	NHS (website)	NHS (doctor's advice)			Blogs		Charities (e.g., Versus Arthritis, Arthritis Action)			Neither agree nor disagree	Neither agree nor disagree	Neither agree nor disagree		Yes	Neither agree nor disagree	Strongly Agree	Stongly Disagree	Agree	Agree	Strongly Agree	Neither agree nor disagree	Neither agree nor disagree	Unlikely	Interested	Interested	Interested	Interested	Interested	Likely	Likely	Very Unlikely	Unlikely	Neither likely nor unlikely	Likely	No
Yes		Yes- I know someone		Exercise & physical activity	Weight management	Medication (prescription only)	Medication (over the counter)	Physiotherapy	Nutrition as medicine (anti-inflammatory diet)	Supplements (e.g., Chondroitin, Glucosamine)		Surgery		Yes								Other	General investigation	Neither agree nor disagree	Agree	Agree		Yes	Agree	Agree	Neither agree nor disagree	Neither agree nor disagree	Neither agree nor disagree	Neither agree nor disagree	Agree	Agree													No
Yes		Yes- I know someone		Exercise & physical activity	Weight management	Medication (prescription only)								No										Disagree	Disagree	Disagree		No	Agree	Agree	Agree	Agree	Neither agree nor disagree	Neither agree nor disagree	Neither agree nor disagree	Disagree													Yes, please explain
Yes		Yes- I know someone			Weight management	Medication (prescription only)	Medication (over the counter)					Surgery		No										Stongly Disagree	Disagree	Stongly Disagree		Yes	Agree	Agree	Neither agree nor disagree	Agree	Neither agree nor disagree	Disagree	Agree	Agree													No
Yes		Yes- I know someone		Exercise & physical activity	Weight management	Medication (prescription only)	Medication (over the counter)	Physiotherapy	Nutrition as medicine (anti-inflammatory diet)					No										Stongly Disagree	Stongly Disagree	Stongly Disagree		Yes	Neither agree nor disagree	Agree	Agree	Agree	Neither agree nor disagree	Strongly Agree	Agree	Agree													No
Yes	Yes - myself			Exercise & physical activity	Weight management	Medication (prescription only)	Medication (over the counter)	Physiotherapy		Supplements (e.g., Chondroitin, Glucosamine)		Surgery		No										Disagree	Disagree	Disagree		Yes	Agree	Agree	Neither agree nor disagree	Agree	Agree	Agree	Agree	Agree	Unlikely	Not at all interested	Slightly interested	Slightly interested	Slightly interested	Not at all interested	Neither likely nor unlikely	Neither likely nor unlikely	Unlikely	Unlikely	Very Unlikely	Unlikely	No
Yes		Yes- I know someone		Exercise & physical activity	Weight management			Physiotherapy	Nutrition as medicine (anti-inflammatory diet)	Supplements (e.g., Chondroitin, Glucosamine)		Surgery		Yes	NHS (website)	NHS (doctor's advice)		Magazines (e.g., Women's/ Men's Health, Good Housekeeping)						Agree	Agree	Strongly Agree		Yes	Strongly Agree	Strongly Agree	Agree	Strongly Agree	Strongly Agree	Strongly Agree	Neither agree nor disagree	Neither agree nor disagree													No
Yes			No	Exercise & physical activity	Weight management	Medication (prescription only)	Medication (over the counter)	Physiotherapy	Nutrition as medicine (anti-inflammatory diet)	Supplements (e.g., Chondroitin, Glucosamine)	Herbs			No										Disagree	Disagree	Disagree		Yes	Agree	Agree	Agree	Agree	Agree	Agree	Agree	Agree													No
Yes	Yes - myself	Yes- I know someone		Exercise & physical activity	Weight management	Medication (prescription only)	Medication (over the counter)	Physiotherapy	Nutrition as medicine (anti-inflammatory diet)	Supplements (e.g., Chondroitin, Glucosamine)		Surgery		Yes	NHS (website)		BBC Food (website)				Charities (e.g., Versus Arthritis, Arthritis Action)			Agree	Agree	Agree		Yes	Strongly Agree	Strongly Agree	Strongly Agree	Strongly Agree	Strongly Agree	Strongly Agree	Strongly Agree	Agree	Unlikely	Interested	Interested	Interested	Interested	Interested	Unlikely	Likely	Unlikely	Unlikely	Unlikely	Unlikely	No
Yes		Yes- I know someone		Exercise & physical activity	Weight management	Medication (prescription only)		Physiotherapy	Nutrition as medicine (anti-inflammatory diet)			Surgery		No										Disagree	Disagree	Disagree		Yes	Agree	Strongly Agree	Agree	Neither agree nor disagree	Neither agree nor disagree	Agree	Agree	Agree													No
Yes		Yes- I know someone		Exercise & physical activity	Weight management	Medication (prescription only)	Medication (over the counter)	Physiotherapy	Nutrition as medicine (anti-inflammatory diet)			Surgery		No										Disagree	Disagree	Disagree		Yes	Strongly Agree	Strongly Agree	Strongly Agree	Strongly Agree	Strongly Agree	Strongly Agree	Strongly Agree	Agree													No
Yes		Yes- I know someone		Exercise & physical activity	Weight management	Medication (prescription only)		Physiotherapy	Nutrition as medicine (anti-inflammatory diet)	Supplements (e.g., Chondroitin, Glucosamine)		Surgery		Yes	NHS (website)	NHS (doctor's advice)								Agree	Neither agree nor disagree	Agree		Yes	Agree	Agree	Agree	Strongly Agree	Agree	Agree	Agree	Agree													No
Yes	Yes - myself	Yes- I know someone			Weight management	Medication (prescription only)	Medication (over the counter)							No										Stongly Disagree	Stongly Disagree	Stongly Disagree		Yes	Strongly Agree	Strongly Agree	Neither agree nor disagree	Neither agree nor disagree	Agree	Strongly Agree	Agree	Neither agree nor disagree	Very unlikely	Very interested	Interested	Very interested	Very interested	Interested	Unlikely	Very Likely	Unlikely	Unlikely	Very Unlikely	Neither likely nor unlikely	No
Yes	Yes - myself			Exercise & physical activity				Physiotherapy				Surgery		No										Disagree	Disagree	Disagree		Yes	Neither agree nor disagree	Agree	Neither agree nor disagree	Neither agree nor disagree	Agree	Agree	Agree	Strongly Agree	Very unlikely	Very interested	Very interested	Very interested	Very interested	Very interested	Unlikely	Neither likely nor unlikely	Very Likely	Unlikely	Unlikely	Very Likely	No
Yes	Yes - myself	Yes- I know someone		Exercise & physical activity	Weight management	Medication (prescription only)			Nutrition as medicine (anti-inflammatory diet)	Supplements (e.g., Chondroitin, Glucosamine)				No										Neither agree nor disagree	Agree	Neither agree nor disagree		No	Agree	Agree	Strongly Agree	Agree	Agree	Agree	Agree	Disagree	Likely	Not at all interested	Slightly interested	Not at all interested	Not at all interested	Not at all interested	Neither likely nor unlikely	Likely	Likely	Likely	Neither likely nor unlikely	Unlikely	No
Yes		Yes- I know someone		Exercise & physical activity	Weight management		Medication (over the counter)	Physiotherapy		Supplements (e.g., Chondroitin, Glucosamine)		Surgery		No										Disagree	Disagree	Disagree		Yes	Strongly Agree	Strongly Agree	Disagree	Agree	Agree	Agree	Neither agree nor disagree	Neither agree nor disagree													No
Yes	Yes - myself			Exercise & physical activity		Medication (prescription only)								No										Stongly Disagree	Stongly Disagree	Neither agree nor disagree		Yes	Agree	Agree	Neither agree nor disagree	Neither agree nor disagree	Agree	Agree	Agree	Neither agree nor disagree	Unlikely	Slightly interested	Neutral	Neutral	Neutral	Not at all interested	Likely	Likely	Neither likely nor unlikely	Likely	Neither likely nor unlikely	Very Likely	No
Yes		Yes- I know someone		Exercise & physical activity	Weight management	Medication (prescription only)			Nutrition as medicine (anti-inflammatory diet)					No										Agree	Agree	Neither agree nor disagree		Yes	Strongly Agree	Strongly Agree	Neither agree nor disagree	Agree	Agree	Agree	Strongly Agree	Disagree													No
Yes	Yes - myself			Exercise & physical activity	Weight management									Yes	NHS (website)	NHS (doctor's advice)				A dietitian/ nutritionist				Strongly Agree	Agree	Strongly Agree		Yes	Agree	Strongly Agree	Agree	Neither agree nor disagree	Strongly Agree	Strongly Agree	Disagree	Stongly Disagree	Likely	Neutral	Interested	Interested	Slightly interested	Not at all interested	Likely	Neither likely nor unlikely	Very Unlikely	Very Likely	Very Unlikely	Likely	No
Yes		Yes- I know someone		Exercise & physical activity	Weight management	Medication (prescription only)	Medication (over the counter)	Physiotherapy	Nutrition as medicine (anti-inflammatory diet)	Supplements (e.g., Chondroitin, Glucosamine)	Herbs	Surgery		No										Disagree	Stongly Disagree	Stongly Disagree		Yes	Agree	Strongly Agree	Disagree	Agree	Strongly Agree	Strongly Agree	Strongly Agree	Stongly Disagree													No
Yes		Yes- I know someone		Exercise & physical activity	Weight management	Medication (prescription only)		Physiotherapy	Nutrition as medicine (anti-inflammatory diet)			Surgery		Yes								Other	General web searches - I don't recall where specifically; this was a long time ago and to do with joint health rather than osteoarthritis specifically.	Disagree	Stongly Disagree	Neither agree nor disagree		Yes	Agree	Agree	Agree	Agree	Agree	Agree	Neither agree nor disagree	Neither agree nor disagree													No
Yes	Yes - myself			Exercise & physical activity	Weight management	Medication (prescription only)		Physiotherapy		Supplements (e.g., Chondroitin, Glucosamine)				No										Neither agree nor disagree	Neither agree nor disagree	Disagree		Yes	Neither agree nor disagree	Neither agree nor disagree	Agree	Agree	Agree	Agree	Neither agree nor disagree	Neither agree nor disagree	Very unlikely	Interested	Neutral	Slightly interested	Interested	Slightly interested	Neither likely nor unlikely	Likely	Neither likely nor unlikely	Likely	Unlikely	Likely	No
Yes	Yes - myself			Exercise & physical activity	Weight management	Medication (prescription only)	Medication (over the counter)	Physiotherapy	Nutrition as medicine (anti-inflammatory diet)	Supplements (e.g., Chondroitin, Glucosamine)				Yes			BBC Food (website)				Charities (e.g., Versus Arthritis, Arthritis Action)			Neither agree nor disagree	Agree	Agree		Yes	Strongly Agree	Strongly Agree	Agree	Agree	Agree	Agree	Agree	Disagree	Likely	Interested	Interested	Interested	Very interested	Interested	Neither likely nor unlikely	Likely	Neither likely nor unlikely	Likely	Neither likely nor unlikely	Neither likely nor unlikely	No
Yes			No	Exercise & physical activity	Weight management	Medication (prescription only)	Medication (over the counter)	Physiotherapy		Supplements (e.g., Chondroitin, Glucosamine)		Surgery		No										Agree	Agree	Stongly Disagree		Yes	Strongly Agree	Strongly Agree	Agree	Agree	Strongly Agree	Strongly Agree	Agree	Strongly Agree													Yes, please explain
Yes		Yes- I know someone		Exercise & physical activity	Weight management				Nutrition as medicine (anti-inflammatory diet)	Supplements (e.g., Chondroitin, Glucosamine)				Yes		NHS (doctor's advice)					Charities (e.g., Versus Arthritis, Arthritis Action)			Agree	Disagree	Neither agree nor disagree		Yes	Agree	Strongly Agree	Stongly Disagree	Disagree	Neither agree nor disagree	Neither agree nor disagree	Neither agree nor disagree	Neither agree nor disagree													No
Yes	Yes - myself			Exercise & physical activity	Weight management	Medication (prescription only)	Medication (over the counter)	Physiotherapy		Supplements (e.g., Chondroitin, Glucosamine)				No										Agree	Agree	Neither agree nor disagree		Yes	Agree	Strongly Agree	Disagree	Neither agree nor disagree	Neither agree nor disagree	Agree	Strongly Agree	Neither agree nor disagree	Likely	Interested	Neutral	Interested	Interested	Interested	Likely	Likely	Neither likely nor unlikely	Likely	Neither likely nor unlikely	Neither likely nor unlikely	No
Yes		Yes- I know someone		Exercise & physical activity	Weight management			Physiotherapy						No										Disagree	Disagree	Neither agree nor disagree		No	Neither agree nor disagree	Agree	Disagree	Agree	Agree	Agree	Agree	Agree													Yes, please explain
Yes		Yes- I know someone		Exercise & physical activity	Weight management		Medication (over the counter)			Supplements (e.g., Chondroitin, Glucosamine)				No										Stongly Disagree	Stongly Disagree	Stongly Disagree		Yes	Agree	Neither agree nor disagree	Neither agree nor disagree	Strongly Agree	Strongly Agree	Agree	Agree	Stongly Disagree													No
Yes		Yes- I know someone		Exercise & physical activity	Weight management	Medication (prescription only)		Physiotherapy	Nutrition as medicine (anti-inflammatory diet)	Supplements (e.g., Chondroitin, Glucosamine)		Surgery		No										Disagree	Agree	Agree		Yes	Agree	Agree	Agree	Agree	Agree	Agree	Agree	Neither agree nor disagree													Yes, please explain
Yes	Yes - myself			Exercise & physical activity	Weight management	Medication (prescription only)	Medication (over the counter)	Physiotherapy	Nutrition as medicine (anti-inflammatory diet)					No										Disagree	Disagree	Stongly Disagree		Yes	Agree	Strongly Agree	Agree	Strongly Agree	Strongly Agree	Strongly Agree	Neither agree nor disagree	Disagree	Very unlikely	Interested	Very interested	Interested	Interested	Interested	Neither likely nor unlikely	Likely	Neither likely nor unlikely	Neither likely nor unlikely	Neither likely nor unlikely	Unlikely	No
Yes	Yes - myself			Exercise & physical activity	Weight management	Medication (prescription only)	Medication (over the counter)	Physiotherapy		Supplements (e.g., Chondroitin, Glucosamine)		Surgery		No										Disagree	Disagree	Disagree		Yes	Agree	Agree	Agree	Agree	Agree	Agree	Strongly Agree	Strongly Agree	Unlikely	Slightly interested	Slightly interested	Slightly interested	Slightly interested	Slightly interested	Likely	Likely	Neither likely nor unlikely	Likely	Very Unlikely	Neither likely nor unlikely	No
Yes	Yes - myself			Exercise & physical activity	Weight management	Medication (prescription only)	Medication (over the counter)	Physiotherapy		Supplements (e.g., Chondroitin, Glucosamine)		Surgery		No										Disagree	Disagree	Neither agree nor disagree		Yes	Agree	Agree	Agree	Agree	Agree	Agree	Disagree	Agree	Unlikely	Not at all interested	Slightly interested	Not at all interested	Slightly interested	Not at all interested	Likely	Likely	Likely	Likely	Unlikely	Very Likely	No
Yes			No		Weight management					Supplements (e.g., Chondroitin, Glucosamine)				No										Disagree	Neither agree nor disagree	Disagree		Yes	Agree	Neither agree nor disagree	Neither agree nor disagree	Agree	Agree	Agree	Agree	Neither agree nor disagree													Yes, please explain
Yes		Yes- I know someone		Exercise & physical activity	Weight management	Medication (prescription only)	Medication (over the counter)	Physiotherapy	Nutrition as medicine (anti-inflammatory diet)			Surgery		Yes	NHS (website)						Charities (e.g., Versus Arthritis, Arthritis Action)			Agree	Agree	Agree		Yes	Agree	Agree	Agree	Agree	Agree	Agree	Agree	Agree													No
Yes			No	Exercise & physical activity	Weight management	Medication (prescription only)		Physiotherapy	Nutrition as medicine (anti-inflammatory diet)	Supplements (e.g., Chondroitin, Glucosamine)				No										Neither agree nor disagree	Neither agree nor disagree	Strongly Agree		Yes	Strongly Agree	Strongly Agree	Strongly Agree	Agree	Agree	Strongly Agree	Strongly Agree	Agree													Yes, please explain
Yes	Yes - myself			Exercise & physical activity		Medication (prescription only)						Surgery		Yes	NHS (website)									Agree	Strongly Agree	Agree		Yes	Agree	Strongly Agree	Agree	Strongly Agree	Agree	Strongly Agree	Strongly Agree	Agree	Likely	Interested	Very interested	Neutral	Very interested	Very interested	Likely	Very Likely	Likely	Very Likely	Likely	Very Likely	No
Yes		Yes- I know someone		Exercise & physical activity	Weight management	Medication (prescription only)						Surgery		No										Disagree	Disagree	Agree		Yes	Agree	Agree	Strongly Agree	Neither agree nor disagree	Disagree	Agree	Agree	Agree													No
Yes		Yes- I know someone		Exercise & physical activity	Weight management	Medication (prescription only)	Medication (over the counter)	Physiotherapy	Nutrition as medicine (anti-inflammatory diet)	Supplements (e.g., Chondroitin, Glucosamine)		Surgery		No										Agree	Agree	Agree		No	Strongly Agree	Strongly Agree	Agree	Agree	Strongly Agree	Strongly Agree	Strongly Agree	Agree													No
Yes			No		Weight management	Medication (prescription only)			Nutrition as medicine (anti-inflammatory diet)					No										Disagree	Disagree	Disagree		Yes	Agree	Agree	Agree	Agree	Agree	Agree	Neither agree nor disagree	Disagree													No
Yes			No			Medication (prescription only)		Physiotherapy						No										Disagree	Disagree	Disagree		Yes	Agree	Agree	Agree	Strongly Agree	Strongly Agree	Agree	Agree	Neither agree nor disagree													No
Yes			No	Exercise & physical activity	Weight management	Medication (prescription only)	Medication (over the counter)	Physiotherapy						No										Disagree	Stongly Disagree	Stongly Disagree		Yes	Agree	Strongly Agree	Disagree	Agree	Strongly Agree	Agree	Neither agree nor disagree	Neither agree nor disagree													No
Yes			No	Exercise & physical activity	Weight management	Medication (prescription only)	Medication (over the counter)	Physiotherapy				Surgery		No										Disagree	Disagree	Disagree		Yes	Agree	Agree	Agree	Agree	Agree	Agree	Agree	Agree													No
Yes	Yes - myself			Exercise & physical activity	Weight management	Medication (prescription only)		Physiotherapy		Supplements (e.g., Chondroitin, Glucosamine)		Surgery		No										Neither agree nor disagree	Disagree	Disagree		No	Agree	Agree	Agree	Neither agree nor disagree	Neither agree nor disagree	Agree	Neither agree nor disagree	Neither agree nor disagree	Unlikely	Neutral	Neutral	Slightly interested	Slightly interested	Not at all interested	Likely	Very Likely	Likely	Likely	Unlikely	Likely	No
Yes	Yes - myself			Exercise & physical activity	Weight management	Medication (prescription only)	Medication (over the counter)	Physiotherapy	Nutrition as medicine (anti-inflammatory diet)	Supplements (e.g., Chondroitin, Glucosamine)	Herbs	Surgery		Yes	NHS (website)	NHS (doctor's advice)	BBC Food (website)			A dietitian/ nutritionist				Strongly Agree	Strongly Agree	Strongly Agree		Yes	Strongly Agree	Strongly Agree	Agree	Strongly Agree	Strongly Agree	Strongly Agree	Agree	Agree	Likely	Interested	Interested	Interested	Interested	Interested	Likely	Likely	Unlikely	Neither likely nor unlikely	Unlikely	Likely	No
Yes	Yes - myself			Exercise & physical activity	Weight management	Medication (prescription only)	Medication (over the counter)	Physiotherapy	Nutrition as medicine (anti-inflammatory diet)	Supplements (e.g., Chondroitin, Glucosamine)	Herbs	Surgery		Yes	NHS (website)	NHS (doctor's advice)	BBC Food (website)							Strongly Agree	Strongly Agree	Agree		Yes	Strongly Agree	Agree	Agree	Agree	Agree	Neither agree nor disagree	Neither agree nor disagree	Agree	Likely	Interested	Interested	Interested	Neutral	Interested	Unlikely	Unlikely	Unlikely	Neither likely nor unlikely	Neither likely nor unlikely	Likely	No
Yes		Yes- I know someone		Exercise & physical activity	Weight management	Medication (prescription only)	Medication (over the counter)	Physiotherapy	Nutrition as medicine (anti-inflammatory diet)	Supplements (e.g., Chondroitin, Glucosamine)		Surgery		Yes	NHS (website)		BBC Food (website)	Magazines (e.g., Women's/ Men's Health, Good Housekeeping)	Blogs					Agree	Agree	Agree		Yes	Strongly Agree	Strongly Agree	Stongly Disagree	Agree	Agree	Strongly Agree	Agree	Disagree													Yes, please explain
Yes		Yes- I know someone		Exercise & physical activity	Weight management	Medication (prescription only)	Medication (over the counter)	Physiotherapy						No										Disagree	Disagree	Neither agree nor disagree		Yes	Agree	Agree	Agree	Agree	Agree	Agree	Agree	Agree													No
Yes		Yes- I know someone		Exercise & physical activity	Weight management	Medication (prescription only)				Supplements (e.g., Chondroitin, Glucosamine)				No										Disagree	Disagree	Disagree		Yes	Agree	Agree	Agree	Agree	Agree	Agree	Agree	Agree													No
Yes		Yes- I know someone		Exercise & physical activity	Weight management	Medication (prescription only)		Physiotherapy		Supplements (e.g., Chondroitin, Glucosamine)	Herbs	Surgery		Yes	NHS (website)		BBC Food (website)			A dietitian/ nutritionist	Charities (e.g., Versus Arthritis, Arthritis Action)			Agree	Agree	Agree		Yes	Strongly Agree	Strongly Agree	Neither agree nor disagree	Neither agree nor disagree	Strongly Agree	Strongly Agree	Strongly Agree	Strongly Agree													No
Yes	Yes - myself			Exercise & physical activity	Weight management	Medication (prescription only)	Medication (over the counter)	Physiotherapy	Nutrition as medicine (anti-inflammatory diet)		Herbs	Surgery		No										Disagree	Disagree	Disagree		Yes	Agree	Agree	Neither agree nor disagree	Neither agree nor disagree	Neither agree nor disagree	Agree	Agree	Strongly Agree	Neutral	Slightly interested	Neutral	Slightly interested	Not at all interested	Not at all interested	Likely	Likely	Likely	Likely	Unlikely	Very Likely	No
Yes			No	Exercise & physical activity	Weight management	Medication (prescription only)	Medication (over the counter)	Physiotherapy	Nutrition as medicine (anti-inflammatory diet)					No										Disagree	Stongly Disagree	Stongly Disagree		No	Agree	Agree	Agree	Agree	Agree	Agree	Agree	Agree													No
Yes		Yes- I know someone										Surgery		No										Agree	Disagree	Neither agree nor disagree		Yes	Neither agree nor disagree	Agree	Agree	Neither agree nor disagree	Agree	Agree	Neither agree nor disagree	Disagree													No
Yes		Yes- I know someone		Exercise & physical activity		Medication (prescription only)				Supplements (e.g., Chondroitin, Glucosamine)		Surgery		Yes	NHS (website)	NHS (doctor's advice)					Charities (e.g., Versus Arthritis, Arthritis Action)			Disagree	Neither agree nor disagree	Agree		Yes	Strongly Agree	Neither agree nor disagree	Strongly Agree	Agree	Strongly Agree	Strongly Agree	Strongly Agree	Strongly Agree													No
Yes	Yes - myself			Exercise & physical activity	Weight management	Medication (prescription only)	Medication (over the counter)	Physiotherapy				Surgery		No										Stongly Disagree	Stongly Disagree	Stongly Disagree		Yes	Strongly Agree	Strongly Agree	Strongly Agree	Strongly Agree	Strongly Agree	Strongly Agree	Strongly Agree	Strongly Agree	Very unlikely	Very interested	Interested	Interested	Very interested	Interested	Unlikely	Very Likely	Unlikely	Unlikely	Very Unlikely	Very Likely	No
Yes	Yes - myself			Exercise & physical activity	Weight management	Medication (prescription only)		Physiotherapy	Nutrition as medicine (anti-inflammatory diet)	Supplements (e.g., Chondroitin, Glucosamine)				Yes	NHS (website)	NHS (doctor's advice)								Agree	Agree	Agree		Yes	Agree	Disagree	Strongly Agree	Agree	Strongly Agree	Agree	Strongly Agree	Agree	Likely	Interested	Interested	Neutral	Interested	Slightly interested	Very Likely	Likely	Neither likely nor unlikely	Likely	Unlikely	Very Likely	Yes, please explain
Yes	Yes - myself			Exercise & physical activity	Weight management		Medication (over the counter)	Physiotherapy		Supplements (e.g., Chondroitin, Glucosamine)		Surgery		No										Stongly Disagree	Stongly Disagree	Stongly Disagree		Yes	Strongly Agree	Strongly Agree	Agree	Strongly Agree	Agree	Agree	Agree	Strongly Agree	Very unlikely	Very interested	Very interested	Very interested	Interested	Interested	Unlikely	Very Likely	Neither likely nor unlikely	Unlikely	Very Unlikely	Very Unlikely	No
Yes		Yes- I know someone				Medication (prescription only)	Medication (over the counter)							No										Disagree	Agree	Strongly Agree		Yes	Agree	Agree	Agree	Agree	Neither agree nor disagree	Agree	Disagree	Neither agree nor disagree													Yes, please explain
Yes			No	Exercise & physical activity	Weight management	Medication (prescription only)				Supplements (e.g., Chondroitin, Glucosamine)		Surgery		No										Disagree	Disagree	Disagree		Yes	Agree	Agree	Disagree	Agree	Agree	Agree	Agree	Disagree													Yes, please explain
Yes	Yes - myself			Exercise & physical activity	Weight management	Medication (prescription only)				Supplements (e.g., Chondroitin, Glucosamine)				No										Disagree	Disagree	Disagree		Yes	Strongly Agree	Strongly Agree	Neither agree nor disagree	Disagree	Strongly Agree	Strongly Agree	Agree	Neither agree nor disagree	Unlikely	Interested	Neutral	Neutral	Interested	Interested	Likely	Very Likely	Neither likely nor unlikely	Likely	Very Likely	Very Likely	No
Yes	Yes - myself			Exercise & physical activity	Weight management	Medication (prescription only)	Medication (over the counter)							Yes							Charities (e.g., Versus Arthritis, Arthritis Action)			Disagree	Disagree	Disagree		Yes	Strongly Agree	Neither agree nor disagree	Neither agree nor disagree	Agree	Strongly Agree	Agree	Disagree	Disagree	Neutral	Slightly interested	Interested	Interested	Interested	Interested	Likely	Likely	Unlikely	Unlikely	Likely	Very Likely	No
Yes			No	Exercise & physical activity	Weight management									No										Disagree	Disagree	Disagree		Yes	Agree	Agree	Stongly Disagree	Disagree	Disagree	Disagree	Disagree	Disagree													No
Yes		Yes- I know someone		Exercise & physical activity	Weight management	Medication (prescription only)		Physiotherapy				Surgery		No										Disagree	Disagree	Disagree		Yes	Agree	Agree	Agree	Agree	Agree	Agree	Agree	Agree													No
Yes	Yes - myself			Exercise & physical activity	Weight management	Medication (prescription only)		Physiotherapy	Nutrition as medicine (anti-inflammatory diet)			Surgery		Yes	NHS (website)						Charities (e.g., Versus Arthritis, Arthritis Action)			Disagree	Agree	Disagree		Yes	Agree	Agree	Agree	Disagree	Agree	Agree	Agree	Agree	Likely	Interested	Not at all interested	Interested	Interested	Not at all interested	Likely	Likely	Very Unlikely	Likely	Very Unlikely	Likely	No
Yes		Yes- I know someone								Supplements (e.g., Chondroitin, Glucosamine)				No										Disagree	Disagree	Stongly Disagree		No	Agree	Neither agree nor disagree	Neither agree nor disagree	Agree	Agree	Neither agree nor disagree	Neither agree nor disagree	Disagree													No
Yes		Yes- I know someone			Weight management	Medication (prescription only)			Nutrition as medicine (anti-inflammatory diet)		Herbs			Yes								Other		Stongly Disagree	Stongly Disagree	Stongly Disagree		No	Agree	Agree	Agree	Agree	Agree	Agree	Agree	Neither agree nor disagree													No
Yes			No	Exercise & physical activity	Weight management	Medication (prescription only)	Medication (over the counter)	Physiotherapy	Nutrition as medicine (anti-inflammatory diet)					No										Disagree	Disagree	Disagree		Yes	Agree	Strongly Agree	Agree	Strongly Agree	Strongly Agree	Agree	Agree	Agree													No
Yes	Yes - myself			Exercise & physical activity		Medication (prescription only)	Medication (over the counter)	Physiotherapy				Surgery		No										Disagree	Neither agree nor disagree	Disagree		Yes	Agree	Agree	Strongly Agree	Strongly Agree	Agree	Agree	Agree	Agree	Unlikely	Neutral	Interested	Slightly interested	Neutral	Not at all interested	Likely	Very Likely	Likely	Neither likely nor unlikely	Unlikely	Likely	Yes, please explain
Yes		Yes- I know someone		Exercise & physical activity	Weight management	Medication (prescription only)	Medication (over the counter)	Physiotherapy						No										Disagree	Disagree	Neither agree nor disagree		Yes	Agree	Agree	Disagree	Neither agree nor disagree	Neither agree nor disagree	Agree	Agree	Disagree													Yes, please explain
Yes		Yes- I know someone			Weight management	Medication (prescription only)		Physiotherapy	Nutrition as medicine (anti-inflammatory diet)					No										Neither agree nor disagree	Neither agree nor disagree	Agree		Yes	Neither agree nor disagree	Agree	Agree	Disagree	Disagree	Agree	Strongly Agree	Neither agree nor disagree													No
Yes	Yes - myself				Weight management							Surgery		No										Disagree	Neither agree nor disagree	Disagree		Yes	Agree	Neither agree nor disagree	Disagree	Disagree	Agree	Agree	Agree	Neither agree nor disagree	Very unlikely	Neutral	Slightly interested	Neutral	Interested	Interested	Likely	Very Likely	Unlikely	Very Unlikely	Neither likely nor unlikely	Likely	No
Yes		Yes- I know someone		Exercise & physical activity	Weight management	Medication (prescription only)		Physiotherapy	Nutrition as medicine (anti-inflammatory diet)	Supplements (e.g., Chondroitin, Glucosamine)				No										Neither agree nor disagree	Disagree	Disagree		No	Agree	Agree	Agree	Agree	Agree	Agree	Agree	Agree													No
Yes		Yes- I know someone		Exercise & physical activity	Weight management			Physiotherapy	Nutrition as medicine (anti-inflammatory diet)	Supplements (e.g., Chondroitin, Glucosamine)				No										Agree	Disagree	Disagree		Yes	Agree	Agree	Agree	Agree	Agree	Agree	Agree	Neither agree nor disagree													No
Yes	Yes - myself				Weight management	Medication (prescription only)		Physiotherapy		Supplements (e.g., Chondroitin, Glucosamine)				No										Stongly Disagree	Stongly Disagree	Stongly Disagree		Yes	Strongly Agree	Strongly Agree	Strongly Agree	Strongly Agree	Strongly Agree	Strongly Agree	Strongly Agree	Neither agree nor disagree	Very unlikely	Interested	Very interested	Interested	Interested	Neutral	Very Likely	Very Likely	Unlikely	Unlikely	Unlikely	Very Likely	No
Yes		Yes- I know someone		Exercise & physical activity	Weight management	Medication (prescription only)		Physiotherapy				Surgery		No										Agree	Agree	Agree		No	Agree	Agree	Agree	Agree	Agree	Agree	Neither agree nor disagree	Neither agree nor disagree													No
Yes	Yes - myself	Yes- I know someone		Exercise & physical activity	Weight management	Medication (prescription only)	Medication (over the counter)	Physiotherapy	Nutrition as medicine (anti-inflammatory diet)	Supplements (e.g., Chondroitin, Glucosamine)		Surgery		Yes	NHS (website)						Charities (e.g., Versus Arthritis, Arthritis Action)	Other	social media	Agree	Agree	Agree		No	Agree	Agree	Neither agree nor disagree	Strongly Agree	Agree	Agree	Agree	Disagree	Unlikely	Very interested	Slightly interested	Neutral	Interested	Not at all interested	Neither likely nor unlikely	Likely	Unlikely	Neither likely nor unlikely	Unlikely	Neither likely nor unlikely	Yes, please explain
Yes		Yes- I know someone		Exercise & physical activity				Physiotherapy				Surgery		No										Disagree	Disagree	Disagree		Yes	Agree	Strongly Agree	Agree	Agree	Agree	Agree	Agree	Neither agree nor disagree													No
Yes		Yes- I know someone		Exercise & physical activity		Medication (prescription only)	Medication (over the counter)		Nutrition as medicine (anti-inflammatory diet)	Supplements (e.g., Chondroitin, Glucosamine)	Herbs	Surgery		No										Neither agree nor disagree	Agree	Strongly Agree		Yes	Strongly Agree	Agree	Strongly Agree	Strongly Agree	Strongly Agree	Neither agree nor disagree	Strongly Agree	Strongly Agree													No
Yes		Yes- I know someone			Weight management	Medication (prescription only)			Nutrition as medicine (anti-inflammatory diet)	Supplements (e.g., Chondroitin, Glucosamine)				No										Neither agree nor disagree	Disagree	Disagree		No	Agree	Agree	Agree	Disagree	Agree	Agree	Disagree	Disagree													No
Yes		Yes- I know someone		Exercise & physical activity	Weight management			Physiotherapy						No										Agree	Neither agree nor disagree	Disagree		Yes	Agree	Agree	Agree	Agree	Agree	Strongly Agree	Agree	Neither agree nor disagree													No
Yes		Yes- I know someone											None of the above	Yes								Other	None. If I ever develop arthritis I will look into it	Stongly Disagree	Stongly Disagree	Strongly Agree		Yes	Strongly Agree	Strongly Agree	Strongly Agree	Strongly Agree	Strongly Agree	Strongly Agree	Strongly Agree	Stongly Disagree													No
Yes	Yes - myself			Exercise & physical activity	Weight management			Physiotherapy						No										Disagree	Agree	Neither agree nor disagree		Yes	Strongly Agree	Strongly Agree	Agree	Agree	Strongly Agree	Strongly Agree	Strongly Agree	Agree	Very unlikely	Interested	Interested	Neutral	Very interested	Slightly interested	Unlikely	Likely	Likely	Likely	Very Unlikely	Likely	No
Yes	Yes - myself			Exercise & physical activity	Weight management	Medication (prescription only)	Medication (over the counter)	Physiotherapy		Supplements (e.g., Chondroitin, Glucosamine)		Surgery		Yes	NHS (website)									Agree	Neither agree nor disagree	Neither agree nor disagree		Yes	Agree	Strongly Agree	Agree	Neither agree nor disagree	Neither agree nor disagree	Agree	Agree	Strongly Agree	Neutral	Interested	Neutral	Neutral	Neutral	Slightly interested	Neither likely nor unlikely	Likely	Unlikely	Neither likely nor unlikely	Unlikely	Very Likely	No
Yes		Yes- I know someone		Exercise & physical activity		Medication (prescription only)			Nutrition as medicine (anti-inflammatory diet)					Yes	NHS (website)				Blogs					Neither agree nor disagree	Neither agree nor disagree	Disagree		Yes	Agree	Agree	Agree	Agree	Strongly Agree	Agree	Agree	Agree													No
Yes			No		Weight management									No										Agree	Agree	Neither agree nor disagree		Yes	Agree	Agree	Neither agree nor disagree	Agree	Agree	Agree	Agree	Neither agree nor disagree													No
Yes	Yes - myself			Exercise & physical activity	Weight management			Physiotherapy	Nutrition as medicine (anti-inflammatory diet)	Supplements (e.g., Chondroitin, Glucosamine)		Surgery		No										Agree	Agree	Agree		Yes	Strongly Agree	Strongly Agree	Neither agree nor disagree	Agree	Strongly Agree	Strongly Agree	Strongly Agree	Disagree	Neutral	Very interested	Very interested	Very interested	Very interested	Very interested	Very Unlikely	Very Unlikely	Very Unlikely	Very Unlikely	Very Unlikely	Very Unlikely	No
Yes	Yes - myself			Exercise & physical activity	Weight management	Medication (prescription only)	Medication (over the counter)	Physiotherapy	Nutrition as medicine (anti-inflammatory diet)	Supplements (e.g., Chondroitin, Glucosamine)	Herbs			Yes	NHS (website)			Magazines (e.g., Women's/ Men's Health, Good Housekeeping)	Blogs		Charities (e.g., Versus Arthritis, Arthritis Action)	Other	Various YouTube videos	Agree	Neither agree nor disagree	Neither agree nor disagree		Yes	Strongly Agree	Strongly Agree	Strongly Agree	Agree	Strongly Agree	Strongly Agree	Strongly Agree	Neither agree nor disagree	Likely	Very interested	Interested	Very interested	Very interested	Interested	Likely	Likely	Very Unlikely	Neither likely nor unlikely	Neither likely nor unlikely	Very Likely	Yes, please explain
Yes	Yes - myself			Exercise & physical activity		Medication (prescription only)			Nutrition as medicine (anti-inflammatory diet)			Surgery		No										Neither agree nor disagree	Disagree	Disagree		Yes	Agree	Agree	Agree	Agree	Agree	Agree	Neither agree nor disagree	Neither agree nor disagree	Very unlikely	Neutral	Neutral	Neutral	Neutral	Slightly interested	Likely	Very Likely	Likely	Likely	Neither likely nor unlikely	Likely	No
Yes	Yes - myself	Yes- I know someone		Exercise & physical activity		Medication (prescription only)		Physiotherapy						Yes	NHS (website)	NHS (doctor's advice)								Agree	Neither agree nor disagree	Disagree		Yes	Agree	Agree	Neither agree nor disagree	Agree	Neither agree nor disagree	Agree	Neither agree nor disagree	Disagree	Neutral	Interested	Interested	Very interested	Interested	Interested	Neither likely nor unlikely	Likely	Unlikely	Very Likely	Likely	Neither likely nor unlikely	No
Yes		Yes- I know someone		Exercise & physical activity		Medication (prescription only)		Physiotherapy				Surgery		No										Disagree	Neither agree nor disagree	Disagree		Yes	Strongly Agree	Strongly Agree	Disagree	Disagree	Strongly Agree	Strongly Agree	Agree	Agree													No
Yes			No	Exercise & physical activity	Weight management	Medication (prescription only)								No										Stongly Disagree	Stongly Disagree	Stongly Disagree		Yes	Agree	Agree	Agree	Neither agree nor disagree	Agree	Agree	Agree	Agree													No
Yes		Yes- I know someone		Exercise & physical activity	Weight management			Physiotherapy						No										Disagree	Disagree	Disagree		Yes	Agree	Agree	Agree	Agree	Agree	Strongly Agree	Agree	Disagree													No
Yes	Yes - myself			Exercise & physical activity	Weight management		Medication (over the counter)		Nutrition as medicine (anti-inflammatory diet)					Yes			BBC Food (website)							Agree	Agree	Agree		Yes	Strongly Agree	Strongly Agree	Neither agree nor disagree	Strongly Agree	Strongly Agree	Strongly Agree	Strongly Agree	Strongly Agree	Neutral	Very interested	Neutral	Neutral	Very interested	Interested	Very Likely	Very Likely	Very Likely	Neither likely nor unlikely	Neither likely nor unlikely	Very Likely	Yes, please explain
Yes		Yes- I know someone		Exercise & physical activity	Weight management			Physiotherapy		Supplements (e.g., Chondroitin, Glucosamine)		Surgery		No										Neither agree nor disagree	Agree	Disagree		Yes	Agree	Strongly Agree	Agree	Neither agree nor disagree	Strongly Agree	Strongly Agree	Strongly Agree	Strongly Agree													No
Yes		Yes- I know someone		Exercise & physical activity	Weight management				Nutrition as medicine (anti-inflammatory diet)					Yes	NHS (website)						Charities (e.g., Versus Arthritis, Arthritis Action)	Other	google website search	Agree	Neither agree nor disagree	Agree		Yes	Strongly Agree	Strongly Agree	Agree	Agree	Strongly Agree	Strongly Agree	Neither agree nor disagree	Neither agree nor disagree													Yes, please explain
Yes	Yes - myself			Exercise & physical activity	Weight management	Medication (prescription only)	Medication (over the counter)	Physiotherapy	Nutrition as medicine (anti-inflammatory diet)	Supplements (e.g., Chondroitin, Glucosamine)	Herbs	Surgery		Yes	NHS (website)									Agree	Agree	Agree		Yes	Agree	Agree	Agree	Agree	Agree	Agree	Agree	Agree	Likely	Neutral	Neutral	Neutral	Neutral	Neutral	Likely	Likely	Likely	Likely	Likely	Likely	No
Yes	Yes - myself			Exercise & physical activity		Medication (prescription only)	Medication (over the counter)		Nutrition as medicine (anti-inflammatory diet)	Supplements (e.g., Chondroitin, Glucosamine)		Surgery		No										Disagree	Disagree	Disagree		Yes	Agree	Agree	Agree	Agree	Agree	Agree	Agree	Neither agree nor disagree	Unlikely	Neutral	Neutral	Not at all interested	Not at all interested	Not at all interested	Likely	Likely	Likely	Neither likely nor unlikely	Neither likely nor unlikely	Very Likely	No
Yes		Yes- I know someone			Weight management	Medication (prescription only)	Medication (over the counter)		Nutrition as medicine (anti-inflammatory diet)					Yes	NHS (website)	NHS (doctor's advice)	BBC Food (website)			A dietitian/ nutritionist	Charities (e.g., Versus Arthritis, Arthritis Action)			Agree	Agree	Disagree		Yes	Neither agree nor disagree	Agree	Disagree	Agree	Agree	Agree	Neither agree nor disagree	Disagree													No
Yes		Yes- I know someone		Exercise & physical activity	Weight management			Physiotherapy	Nutrition as medicine (anti-inflammatory diet)	Supplements (e.g., Chondroitin, Glucosamine)				No										Disagree	Disagree	Disagree		No	Agree	Agree	Agree	Agree	Agree	Agree	Agree	Agree													No
Yes	Yes - myself			Exercise & physical activity	Weight management	Medication (prescription only)		Physiotherapy		Supplements (e.g., Chondroitin, Glucosamine)				No										Stongly Disagree	Stongly Disagree	Neither agree nor disagree		Yes	Strongly Agree	Strongly Agree	Agree	Neither agree nor disagree	Agree	Agree	Agree	Agree	Unlikely	Neutral	Neutral	Neutral	Slightly interested	Not at all interested	Neither likely nor unlikely	Likely	Neither likely nor unlikely	Likely	Unlikely	Very Likely	No
Yes	Yes - myself				Weight management	Medication (prescription only)			Nutrition as medicine (anti-inflammatory diet)	Supplements (e.g., Chondroitin, Glucosamine)		Surgery		Yes								Other	Internet	Neither agree nor disagree	Neither agree nor disagree	Agree		Yes	Strongly Agree	Strongly Agree	Disagree	Neither agree nor disagree	Strongly Agree	Strongly Agree	Strongly Agree	Strongly Agree	Unlikely	Slightly interested	Slightly interested	Slightly interested	Slightly interested	Slightly interested	Unlikely	Likely	Neither likely nor unlikely	Neither likely nor unlikely	Unlikely	Very Likely	No
Yes			No	Exercise & physical activity	Weight management	Medication (prescription only)		Physiotherapy						Yes	NHS (website)		BBC Food (website)		Blogs					Disagree	Neither agree nor disagree	Disagree		Yes	Agree	Agree	Disagree	Disagree	Disagree	Agree	Agree	Neither agree nor disagree													No
Yes			No	Exercise & physical activity	Weight management	Medication (prescription only)		Physiotherapy				Surgery		No										Stongly Disagree	Stongly Disagree	Stongly Disagree		No	Agree	Agree	Agree	Strongly Agree	Strongly Agree	Agree	Neither agree nor disagree	Neither agree nor disagree													No
Yes			No	Exercise & physical activity	Weight management			Physiotherapy	Nutrition as medicine (anti-inflammatory diet)	Supplements (e.g., Chondroitin, Glucosamine)		Surgery		No										Disagree	Disagree	Neither agree nor disagree		Yes	Strongly Agree	Agree	Strongly Agree	Disagree	Agree	Agree	Agree	Agree													No
Yes		Yes- I know someone		Exercise & physical activity	Weight management	Medication (prescription only)		Physiotherapy	Nutrition as medicine (anti-inflammatory diet)			Surgery		Yes	NHS (website)							Other	Other reputable medical sites	Agree	Stongly Disagree	Agree		Yes	Strongly Agree	Strongly Agree	Strongly Agree	Strongly Agree	Strongly Agree	Strongly Agree	Strongly Agree	Agree													Yes, please explain
Yes		Yes- I know someone		Exercise & physical activity	Weight management	Medication (prescription only)		Physiotherapy	Nutrition as medicine (anti-inflammatory diet)	Supplements (e.g., Chondroitin, Glucosamine)				Yes	NHS (website)			Magazines (e.g., Women's/ Men's Health, Good Housekeeping)						Agree	Strongly Agree	Agree		Yes	Strongly Agree	Strongly Agree	Neither agree nor disagree	Neither agree nor disagree	Strongly Agree	Strongly Agree	Strongly Agree	Neither agree nor disagree													No
Yes		Yes- I know someone		Exercise & physical activity					Nutrition as medicine (anti-inflammatory diet)	Supplements (e.g., Chondroitin, Glucosamine)	Herbs			Yes	NHS (website)	NHS (doctor's advice)				A dietitian/ nutritionist				Agree	Agree	Agree		Yes	Agree	Agree	Agree	Agree	Strongly Agree	Strongly Agree	Strongly Agree	Agree													Yes, please explain
Yes	Yes - myself			Exercise & physical activity	Weight management	Medication (prescription only)	Medication (over the counter)	Physiotherapy	Nutrition as medicine (anti-inflammatory diet)	Supplements (e.g., Chondroitin, Glucosamine)	Herbs	Surgery		Yes	NHS (website)	NHS (doctor's advice)					Charities (e.g., Versus Arthritis, Arthritis Action)			Strongly Agree	Strongly Agree	Strongly Agree		Yes	Strongly Agree	Strongly Agree	Strongly Agree	Strongly Agree	Strongly Agree	Strongly Agree	Strongly Agree	Strongly Agree	Very likely	Very interested	Very interested	Very interested	Very interested	Very interested	Very Unlikely	Very Unlikely	Very Unlikely	Very Unlikely	Very Unlikely	Very Unlikely	No
Yes			No	Exercise & physical activity		Medication (prescription only)	Medication (over the counter)	Physiotherapy				Surgery		No										Disagree	Stongly Disagree	Disagree		Yes	Agree	Strongly Agree	Agree	Agree	Agree	Strongly Agree	Agree	Agree													No
Yes		Yes- I know someone		Exercise & physical activity	Weight management	Medication (prescription only)	Medication (over the counter)	Physiotherapy	Nutrition as medicine (anti-inflammatory diet)	Supplements (e.g., Chondroitin, Glucosamine)	Herbs	Surgery		No										Neither agree nor disagree	Agree	Agree		No	Neither agree nor disagree	Neither agree nor disagree	Disagree	Agree	Agree	Agree	Neither agree nor disagree	Disagree													No
Yes		Yes- I know someone		Exercise & physical activity	Weight management	Medication (prescription only)		Physiotherapy						No										Disagree	Disagree	Disagree		Yes	Agree	Agree	Neither agree nor disagree	Neither agree nor disagree	Agree	Agree	Agree	Agree													No
Yes		Yes- I know someone			Weight management	Medication (prescription only)		Physiotherapy				Surgery		No										Agree	Agree	Neither agree nor disagree		Yes	Agree	Agree	Agree	Agree	Agree	Agree	Agree	Agree													No
Yes	Yes - myself			Exercise & physical activity	Weight management	Medication (prescription only)	Medication (over the counter)	Physiotherapy	Nutrition as medicine (anti-inflammatory diet)	Supplements (e.g., Chondroitin, Glucosamine)	Herbs	Surgery		Yes	NHS (website)		BBC Food (website)	Magazines (e.g., Women's/ Men's Health, Good Housekeeping)	Blogs		Charities (e.g., Versus Arthritis, Arthritis Action)			Neither agree nor disagree	Neither agree nor disagree	Disagree		Yes	Agree	Strongly Agree	Agree	Agree	Strongly Agree	Strongly Agree	Agree	Agree	Likely	Very interested	Interested	Very interested	Interested	Interested	Likely	Neither likely nor unlikely	Very Unlikely	Very Unlikely	Neither likely nor unlikely	Neither likely nor unlikely	No
Yes		Yes- I know someone		Exercise & physical activity				Physiotherapy	Nutrition as medicine (anti-inflammatory diet)	Supplements (e.g., Chondroitin, Glucosamine)				No										Strongly Agree	Stongly Disagree	Neither agree nor disagree		Yes	Strongly Agree	Strongly Agree	Agree	Strongly Agree	Strongly Agree	Strongly Agree	Strongly Agree	Agree													Yes, please explain
Yes		Yes- I know someone		Exercise & physical activity		Medication (prescription only)		Physiotherapy	Nutrition as medicine (anti-inflammatory diet)	Supplements (e.g., Chondroitin, Glucosamine)				No										Neither agree nor disagree	Disagree	Disagree		Yes	Agree	Agree	Agree	Agree	Agree	Agree	Agree	Neither agree nor disagree													Yes, please explain
Yes		Yes- I know someone		Exercise & physical activity	Weight management	Medication (prescription only)	Medication (over the counter)	Physiotherapy		Supplements (e.g., Chondroitin, Glucosamine)		Surgery		No										Disagree	Disagree	Neither agree nor disagree		Yes	Agree	Agree	Strongly Agree	Strongly Agree	Strongly Agree	Agree	Agree	Neither agree nor disagree													No
Yes		Yes- I know someone		Exercise & physical activity	Weight management	Medication (prescription only)		Physiotherapy						No										Neither agree nor disagree	Neither agree nor disagree	Disagree		No	Neither agree nor disagree	Agree	Agree	Agree	Agree	Agree	Agree	Stongly Disagree													No
Yes		Yes- I know someone		Exercise & physical activity	Weight management			Physiotherapy						No										Disagree	Disagree	Disagree		No	Agree	Agree	Stongly Disagree	Stongly Disagree	Agree	Agree	Neither agree nor disagree	Stongly Disagree													No
Yes			No	Exercise & physical activity		Medication (prescription only)			Nutrition as medicine (anti-inflammatory diet)		Herbs			No										Agree	Agree	Agree		Yes	Agree	Agree	Agree	Agree	Agree	Agree	Agree	Neither agree nor disagree													No
Yes	Yes - myself							Physiotherapy						No										Disagree	Disagree	Disagree		Yes	Agree	Agree	Disagree	Disagree	Agree	Disagree	Agree	Disagree	Likely	Interested	Slightly interested	Interested	Interested	Interested	Likely	Likely	Neither likely nor unlikely	Likely	Likely	Likely	No
Yes		Yes- I know someone		Exercise & physical activity	Weight management	Medication (prescription only)			Nutrition as medicine (anti-inflammatory diet)	Supplements (e.g., Chondroitin, Glucosamine)		Surgery		No										Disagree	Disagree	Disagree		Yes	Neither agree nor disagree	Agree	Strongly Agree	Agree	Agree	Strongly Agree	Strongly Agree	Strongly Agree													No
Yes		Yes- I know someone		Exercise & physical activity	Weight management	Medication (prescription only)			Nutrition as medicine (anti-inflammatory diet)	Supplements (e.g., Chondroitin, Glucosamine)	Herbs	Surgery		Yes	NHS (website)		BBC Food (website)	Magazines (e.g., Women's/ Men's Health, Good Housekeeping)		A dietitian/ nutritionist				Neither agree nor disagree	Neither agree nor disagree	Agree		Yes	Strongly Agree	Agree	Strongly Agree	Strongly Agree	Strongly Agree	Strongly Agree	Strongly Agree	Strongly Agree													Yes, please explain
Yes			No	Exercise & physical activity	Weight management									No										Disagree	Disagree	Disagree		Yes	Agree	Agree	Agree	Agree	Agree	Strongly Agree	Agree	Neither agree nor disagree													No
Yes		Yes- I know someone		Exercise & physical activity	Weight management			Physiotherapy		Supplements (e.g., Chondroitin, Glucosamine)				No										Neither agree nor disagree	Disagree	Disagree		Yes	Agree	Agree	Agree	Agree	Agree	Agree	Strongly Agree	Agree													Yes, please explain
Yes			No	Exercise & physical activity					Nutrition as medicine (anti-inflammatory diet)	Supplements (e.g., Chondroitin, Glucosamine)		Surgery		No										Agree	Agree	Disagree		Yes	Strongly Agree	Strongly Agree	Agree	Agree	Strongly Agree	Strongly Agree	Agree	Disagree													No
Yes		Yes- I know someone		Exercise & physical activity		Medication (prescription only)		Physiotherapy		Supplements (e.g., Chondroitin, Glucosamine)		Surgery		No										Disagree	Disagree	Disagree		Yes	Agree	Agree	Agree	Agree	Agree	Agree	Neither agree nor disagree	Neither agree nor disagree													No
Yes		Yes- I know someone		Exercise & physical activity	Weight management	Medication (prescription only)	Medication (over the counter)	Physiotherapy						No										Stongly Disagree	Stongly Disagree	Stongly Disagree		Yes	Agree	Strongly Agree	Agree	Neither agree nor disagree	Agree	Agree	Agree	Neither agree nor disagree													No
Yes		Yes- I know someone				Medication (prescription only)			Nutrition as medicine (anti-inflammatory diet)					No										Neither agree nor disagree	Neither agree nor disagree	Disagree		Yes	Agree	Agree	Agree	Agree	Agree	Agree	Agree	Agree													No
Yes	Yes - myself			Exercise & physical activity	Weight management	Medication (prescription only)	Medication (over the counter)	Physiotherapy		Supplements (e.g., Chondroitin, Glucosamine)	Herbs	Surgery		No										Disagree	Disagree	Disagree		Yes	Neither agree nor disagree	Disagree	Disagree	Disagree	Stongly Disagree	Stongly Disagree	Stongly Disagree	Strongly Agree	Very unlikely	Very interested	Neutral	Neutral	Neutral	Not at all interested	Unlikely	Very Likely	Very Likely	Very Unlikely	Very Unlikely	Very Likely	Yes, please explain
Yes	Yes - myself			Exercise & physical activity	Weight management	Medication (prescription only)	Medication (over the counter)		Nutrition as medicine (anti-inflammatory diet)	Supplements (e.g., Chondroitin, Glucosamine)		Surgery		Yes		NHS (doctor's advice)								Neither agree nor disagree	Neither agree nor disagree	Agree		Yes	Agree	Strongly Agree	Strongly Agree	Agree	Agree	Agree	Agree	Disagree	Unlikely	Not at all interested	Not at all interested	Not at all interested	Not at all interested	Not at all interested	Unlikely	Likely	Very Likely	Likely	Very Unlikely	Likely	Yes, please explain
Yes			No	Exercise & physical activity			Medication (over the counter)							Yes					Blogs					Neither agree nor disagree	Neither agree nor disagree	Disagree		Yes	Neither agree nor disagree	Agree	Disagree	Agree	Agree	Agree	Agree	Neither agree nor disagree													No
Yes		Yes- I know someone		Exercise & physical activity	Weight management	Medication (prescription only)	Medication (over the counter)		Nutrition as medicine (anti-inflammatory diet)	Supplements (e.g., Chondroitin, Glucosamine)				No										Agree	Agree	Agree		Yes	Strongly Agree	Strongly Agree	Agree	Agree	Strongly Agree	Agree	Agree	Agree													No
Yes			No			Medication (prescription only)								No										Disagree	Disagree	Disagree		No	Agree	Agree	Agree	Agree	Agree	Agree	Agree	Agree													No
Yes			No	Exercise & physical activity	Weight management	Medication (prescription only)	Medication (over the counter)	Physiotherapy	Nutrition as medicine (anti-inflammatory diet)	Supplements (e.g., Chondroitin, Glucosamine)		Surgery		No										Neither agree nor disagree	Neither agree nor disagree	Disagree		No	Strongly Agree	Agree	Agree	Agree	Strongly Agree	Strongly Agree	Strongly Agree	Neither agree nor disagree													Yes, please explain
Yes		Yes- I know someone		Exercise & physical activity	Weight management	Medication (prescription only)		Physiotherapy	Nutrition as medicine (anti-inflammatory diet)	Supplements (e.g., Chondroitin, Glucosamine)		Surgery		No										Agree	Disagree	Disagree		Yes	Agree	Strongly Agree	Strongly Agree	Agree	Agree	Agree	Agree	Agree													No
Yes	Yes - myself			Exercise & physical activity	Weight management	Medication (prescription only)	Medication (over the counter)	Physiotherapy		Supplements (e.g., Chondroitin, Glucosamine)		Surgery		Yes		NHS (doctor's advice)				A dietitian/ nutritionist				Agree	Disagree	Neither agree nor disagree		Yes	Agree	Agree	Strongly Agree	Agree	Agree	Neither agree nor disagree	Strongly Agree	Strongly Agree	Neutral	Neutral	Neutral	Interested	Interested	Neutral	Likely	Likely	Neither likely nor unlikely	Neither likely nor unlikely	Very Unlikely	Very Likely	Yes, please explain
Yes		Yes- I know someone		Exercise & physical activity			Medication (over the counter)							No										Neither agree nor disagree	Neither agree nor disagree	Disagree		Yes	Agree	Agree	Neither agree nor disagree	Agree	Neither agree nor disagree	Agree	Agree	Neither agree nor disagree													No
Yes			No	Exercise & physical activity	Weight management			Physiotherapy		Supplements (e.g., Chondroitin, Glucosamine)				No										Disagree	Disagree	Neither agree nor disagree		Yes	Agree	Strongly Agree	Neither agree nor disagree	Neither agree nor disagree	Strongly Agree	Strongly Agree	Strongly Agree	Neither agree nor disagree													Yes, please explain
Yes		Yes- I know someone					Medication (over the counter)					Surgery		No										Disagree	Disagree	Disagree		Yes	Agree	Strongly Agree	Agree	Agree	Agree	Agree	Strongly Agree	Neither agree nor disagree													No
Yes		Yes- I know someone		Exercise & physical activity	Weight management	Medication (prescription only)								No										Disagree	Disagree	Disagree		Yes	Agree	Agree	Agree	Agree	Agree	Agree	Agree	Agree													No
Yes	Yes - myself				Weight management	Medication (prescription only)	Medication (over the counter)			Supplements (e.g., Chondroitin, Glucosamine)				Yes	NHS (website)						Charities (e.g., Versus Arthritis, Arthritis Action)			Disagree	Disagree	Disagree		Yes	Agree	Agree	Agree	Agree	Neither agree nor disagree	Neither agree nor disagree	Agree	Neither agree nor disagree	Unlikely	Very interested	Interested	Neutral	Neutral	Neutral	Unlikely	Likely	Likely	Likely	Unlikely	Likely	No
Yes	Yes - myself	Yes- I know someone		Exercise & physical activity	Weight management	Medication (prescription only)	Medication (over the counter)			Supplements (e.g., Chondroitin, Glucosamine)				No										Stongly Disagree	Stongly Disagree	Disagree		Yes	Agree	Agree	Neither agree nor disagree	Agree	Agree	Agree	Neither agree nor disagree	Disagree	Unlikely	Interested	Interested	Slightly interested	Interested	Interested	Unlikely	Very Likely	Likely	Unlikely	Unlikely	Very Likely	No
Yes		Yes- I know someone		Exercise & physical activity		Medication (prescription only)		Physiotherapy	Nutrition as medicine (anti-inflammatory diet)					Yes			BBC Food (website)	Magazines (e.g., Women's/ Men's Health, Good Housekeeping)						Neither agree nor disagree	Neither agree nor disagree	Neither agree nor disagree		Yes	Agree	Agree	Neither agree nor disagree	Disagree	Disagree	Agree	Disagree	Disagree													No
Yes			No	Exercise & physical activity	Weight management	Medication (prescription only)			Nutrition as medicine (anti-inflammatory diet)			Surgery		No										Neither agree nor disagree	Agree	Agree		Yes	Strongly Agree	Strongly Agree	Agree	Disagree	Strongly Agree	Strongly Agree	Agree	Agree													No
Yes		Yes- I know someone		Exercise & physical activity	Weight management	Medication (prescription only)		Physiotherapy				Surgery		No										Disagree	Stongly Disagree	Neither agree nor disagree		Yes	Neither agree nor disagree	Agree	Strongly Agree	Neither agree nor disagree	Stongly Disagree	Neither agree nor disagree	Neither agree nor disagree	Neither agree nor disagree													No
Yes			No	Exercise & physical activity	Weight management	Medication (prescription only)	Medication (over the counter)	Physiotherapy						No										Stongly Disagree	Stongly Disagree	Stongly Disagree		No	Agree	Agree	Strongly Agree	Strongly Agree	Neither agree nor disagree	Agree	Neither agree nor disagree	Neither agree nor disagree													Yes, please explain
Yes		Yes- I know someone		Exercise & physical activity	Weight management	Medication (prescription only)	Medication (over the counter)	Physiotherapy	Nutrition as medicine (anti-inflammatory diet)	Supplements (e.g., Chondroitin, Glucosamine)		Surgery		Yes	NHS (website)				Blogs					Disagree	Disagree	Disagree		Yes	Strongly Agree	Strongly Agree	Agree	Agree	Agree	Agree	Agree	Neither agree nor disagree													Yes, please explain
Yes	Yes - myself			Exercise & physical activity	Weight management	Medication (prescription only)	Medication (over the counter)		Nutrition as medicine (anti-inflammatory diet)	Supplements (e.g., Chondroitin, Glucosamine)		Surgery		No										Disagree	Disagree	Disagree		Yes	Strongly Agree	Agree	Agree	Agree	Agree	Agree	Agree	Agree	Unlikely	Slightly interested	Slightly interested	Slightly interested	Slightly interested	Slightly interested	Likely	Likely	Neither likely nor unlikely	Likely	Likely	Very Unlikely	No
Yes			No	Exercise & physical activity	Weight management	Medication (prescription only)		Physiotherapy				Surgery		No										Stongly Disagree	Agree	Stongly Disagree		Yes	Agree	Strongly Agree	Agree	Agree	Strongly Agree	Agree	Neither agree nor disagree	Agree													No
Yes		Yes- I know someone		Exercise & physical activity	Weight management	Medication (prescription only)		Physiotherapy		Supplements (e.g., Chondroitin, Glucosamine)	Herbs			Yes	NHS (website)						Charities (e.g., Versus Arthritis, Arthritis Action)	Other	Google for herbal supplements rosehip	Stongly Disagree	Stongly Disagree	Disagree		Yes	Strongly Agree	Strongly Agree	Neither agree nor disagree	Disagree	Agree	Strongly Agree	Strongly Agree	Neither agree nor disagree													No
Yes	Yes - myself	Yes- I know someone		Exercise & physical activity	Weight management	Medication (prescription only)	Medication (over the counter)	Physiotherapy				Surgery		No										Disagree	Disagree	Disagree		Yes	Agree	Agree	Neither agree nor disagree	Neither agree nor disagree	Neither agree nor disagree	Agree	Agree	Agree	Very unlikely	Slightly interested	Not at all interested	Slightly interested	Slightly interested	Slightly interested	Unlikely	Very Likely	Neither likely nor unlikely	Likely	Unlikely	Likely	No
Yes		Yes- I know someone				Medication (prescription only)		Physiotherapy				Surgery		No										Neither agree nor disagree	Disagree	Disagree		Yes	Agree	Agree	Agree	Neither agree nor disagree	Agree	Agree	Agree	Agree													Yes, please explain
Yes		Yes- I know someone		Exercise & physical activity	Weight management	Medication (prescription only)	Medication (over the counter)	Physiotherapy						No										Neither agree nor disagree	Stongly Disagree	Stongly Disagree		Yes	Strongly Agree	Strongly Agree	Neither agree nor disagree	Neither agree nor disagree	Strongly Agree	Strongly Agree	Strongly Agree	Agree													Yes, please explain
Yes		Yes- I know someone		Exercise & physical activity	Weight management	Medication (prescription only)		Physiotherapy		Supplements (e.g., Chondroitin, Glucosamine)		Surgery		No										Neither agree nor disagree	Agree	Disagree		Yes	Agree	Agree	Agree	Agree	Agree	Agree	Agree	Agree													Yes, please explain
Yes		Yes- I know someone		Exercise & physical activity	Weight management	Medication (prescription only)		Physiotherapy	Nutrition as medicine (anti-inflammatory diet)	Supplements (e.g., Chondroitin, Glucosamine)	Herbs			Yes				Magazines (e.g., Women's/ Men's Health, Good Housekeeping)			Charities (e.g., Versus Arthritis, Arthritis Action)			Agree	Agree	Agree		Yes	Strongly Agree	Strongly Agree	Disagree	Disagree	Strongly Agree	Agree	Agree	Stongly Disagree													No
Yes		Yes- I know someone				Medication (prescription only)								No										Stongly Disagree	Stongly Disagree	Stongly Disagree		Yes	Agree	Agree	Agree	Neither agree nor disagree	Agree	Neither agree nor disagree	Neither agree nor disagree	Neither agree nor disagree													No
Yes		Yes- I know someone		Exercise & physical activity	Weight management	Medication (prescription only)	Medication (over the counter)	Physiotherapy	Nutrition as medicine (anti-inflammatory diet)			Surgery		No										Agree	Disagree	Neither agree nor disagree		Yes	Agree	Agree	Agree	Agree	Disagree	Agree	Agree	Agree													No
Yes		Yes- I know someone		Exercise & physical activity	Weight management	Medication (prescription only)								No										Neither agree nor disagree	Neither agree nor disagree	Disagree		Yes	Agree	Agree	Agree	Neither agree nor disagree	Neither agree nor disagree	Agree	Agree	Agree													No
Yes	Yes - myself			Exercise & physical activity	Weight management	Medication (prescription only)		Physiotherapy	Nutrition as medicine (anti-inflammatory diet)			Surgery		No										Neither agree nor disagree	Disagree	Disagree		Yes	Agree	Agree	Agree	Neither agree nor disagree	Agree	Neither agree nor disagree	Agree	Neither agree nor disagree	Unlikely	Slightly interested	Slightly interested	Neutral	Interested	Not at all interested	Neither likely nor unlikely	Likely	Unlikely	Very Likely	Very Unlikely	Likely	No
Yes	Yes - myself			Exercise & physical activity	Weight management			Physiotherapy	Nutrition as medicine (anti-inflammatory diet)	Supplements (e.g., Chondroitin, Glucosamine)				Yes	NHS (website)	NHS (doctor's advice)					Charities (e.g., Versus Arthritis, Arthritis Action)			Agree	Agree	Agree		Yes	Strongly Agree	Strongly Agree	Agree	Agree	Strongly Agree	Strongly Agree	Strongly Agree	Neither agree nor disagree	Very likely	Interested	Interested	Interested	Interested	Interested	Neither likely nor unlikely	Neither likely nor unlikely	Very Unlikely	Unlikely	Very Unlikely	Neither likely nor unlikely	No
Yes	Yes - myself			Exercise & physical activity	Weight management	Medication (prescription only)								No										Agree	Agree	Agree		Yes	Agree	Agree	Agree	Agree	Agree	Agree	Agree	Agree	Likely	Not at all interested	Not at all interested	Not at all interested	Not at all interested	Not at all interested	Likely	Likely	Neither likely nor unlikely	Likely	Unlikely	Unlikely	No
Yes	Yes - myself			Exercise & physical activity	Weight management	Medication (prescription only)	Medication (over the counter)	Physiotherapy	Nutrition as medicine (anti-inflammatory diet)	Supplements (e.g., Chondroitin, Glucosamine)		Surgery		Yes	NHS (website)							Other	general google search	Agree	Disagree	Neither agree nor disagree		Yes	Agree	Agree	Disagree	Agree	Agree	Agree	Agree	Agree	Unlikely	Slightly interested	Not at all interested	Neutral	Interested	Not at all interested	Unlikely	Likely	Very Unlikely	Very Unlikely	Very Unlikely	Neither likely nor unlikely	Yes, please explain
Yes	Yes - myself			Exercise & physical activity	Weight management		Medication (over the counter)	Physiotherapy						No										Strongly Agree	Agree	Agree		Yes	Agree	Strongly Agree	Disagree	Disagree	Neither agree nor disagree	Agree	Neither agree nor disagree	Neither agree nor disagree	Neutral	Slightly interested	Slightly interested	Slightly interested	Slightly interested	Interested	Likely	Likely	Very Unlikely	Very Unlikely	Unlikely	Likely	No
Yes		Yes- I know someone		Exercise & physical activity		Medication (prescription only)	Medication (over the counter)	Physiotherapy	Nutrition as medicine (anti-inflammatory diet)	Supplements (e.g., Chondroitin, Glucosamine)				Yes						A dietitian/ nutritionist	Charities (e.g., Versus Arthritis, Arthritis Action)			Disagree	Disagree	Agree		Yes	Strongly Agree	Strongly Agree	Strongly Agree	Neither agree nor disagree	Strongly Agree	Strongly Agree	Strongly Agree	Neither agree nor disagree													Yes, please explain
Yes		Yes- I know someone		Exercise & physical activity	Weight management	Medication (prescription only)		Physiotherapy	Nutrition as medicine (anti-inflammatory diet)	Supplements (e.g., Chondroitin, Glucosamine)				No										Disagree	Neither agree nor disagree	Disagree		No	Agree	Agree	Agree	Agree	Agree	Agree	Agree	Agree													No
Yes			No										None of the above	No										Stongly Disagree	Stongly Disagree	Stongly Disagree		Yes	Agree	Agree	Neither agree nor disagree	Neither agree nor disagree	Agree	Agree	Agree	Neither agree nor disagree													No
Yes		Yes- I know someone		Exercise & physical activity	Weight management	Medication (prescription only)		Physiotherapy	Nutrition as medicine (anti-inflammatory diet)	Supplements (e.g., Chondroitin, Glucosamine)		Surgery		Yes	NHS (website)			Magazines (e.g., Women's/ Men's Health, Good Housekeeping)						Agree	Disagree	Disagree		Yes	Strongly Agree	Strongly Agree	Agree	Neither agree nor disagree	Agree	Strongly Agree	Agree	Agree													No
Yes		Yes- I know someone		Exercise & physical activity	Weight management	Medication (prescription only)	Medication (over the counter)	Physiotherapy	Nutrition as medicine (anti-inflammatory diet)	Supplements (e.g., Chondroitin, Glucosamine)		Surgery		Yes	NHS (website)	NHS (doctor's advice)		Magazines (e.g., Women's/ Men's Health, Good Housekeeping)		A dietitian/ nutritionist	Charities (e.g., Versus Arthritis, Arthritis Action)			Agree	Agree	Agree		Yes	Strongly Agree	Strongly Agree	Agree	Agree	Agree	Agree	Agree	Neither agree nor disagree													No
Yes			No	Exercise & physical activity	Weight management									No										Stongly Disagree	Stongly Disagree	Stongly Disagree		No	Neither agree nor disagree	Agree	Agree	Agree	Strongly Agree	Agree	Agree	Neither agree nor disagree													No
Yes		Yes- I know someone		Exercise & physical activity	Weight management	Medication (prescription only)	Medication (over the counter)	Physiotherapy	Nutrition as medicine (anti-inflammatory diet)	Supplements (e.g., Chondroitin, Glucosamine)	Herbs	Surgery		No										Stongly Disagree	Stongly Disagree	Stongly Disagree		Yes	Strongly Agree	Strongly Agree	Strongly Agree	Strongly Agree	Strongly Agree	Strongly Agree	Strongly Agree	Strongly Agree													No
Yes		Yes- I know someone		Exercise & physical activity		Medication (prescription only)		Physiotherapy						No										Stongly Disagree	Stongly Disagree	Disagree		No	Strongly Agree	Strongly Agree	Strongly Agree	Strongly Agree	Strongly Agree	Strongly Agree	Strongly Agree	Strongly Agree													No
Yes	Yes - myself			Exercise & physical activity	Weight management	Medication (prescription only)	Medication (over the counter)	Physiotherapy	Nutrition as medicine (anti-inflammatory diet)	Supplements (e.g., Chondroitin, Glucosamine)	Herbs	Surgery		Yes	NHS (website)	NHS (doctor's advice)				A dietitian/ nutritionist				Agree	Agree	Agree		Yes	Strongly Agree	Strongly Agree	Disagree	Neither agree nor disagree	Agree	Strongly Agree	Agree	Neither agree nor disagree	Likely	Very interested	Very interested	Very interested	Interested	Interested	Unlikely	Unlikely	Unlikely	Neither likely nor unlikely	Unlikely	Likely	No
Yes			No	Exercise & physical activity	Weight management	Medication (prescription only)	Medication (over the counter)	Physiotherapy		Supplements (e.g., Chondroitin, Glucosamine)		Surgery		Yes	NHS (website)									Disagree	Disagree	Neither agree nor disagree		Yes	Agree	Agree	Agree	Neither agree nor disagree	Agree	Agree	Agree	Agree													No
Yes			No			Medication (prescription only)								No										Stongly Disagree	Stongly Disagree	Stongly Disagree		Yes	Agree	Disagree	Agree	Stongly Disagree	Stongly Disagree	Agree	Neither agree nor disagree	Stongly Disagree													No
Yes	Yes - myself												None of the above	No										Stongly Disagree	Stongly Disagree	Stongly Disagree		Yes	Agree	Agree	Agree	Agree	Neither agree nor disagree	Agree	Neither agree nor disagree	Agree	Very unlikely	Interested	Interested	Interested	Interested	Neutral	Likely	Very Likely	Unlikely	Very Unlikely	Unlikely	Very Likely	No
Yes		Yes- I know someone		Exercise & physical activity	Weight management	Medication (prescription only)		Physiotherapy			Herbs			No										Agree	Agree	Agree		Yes	Agree	Agree	Agree	Agree	Agree	Agree	Agree	Neither agree nor disagree													No
Yes		Yes- I know someone		Exercise & physical activity		Medication (prescription only)	Medication (over the counter)	Physiotherapy		Supplements (e.g., Chondroitin, Glucosamine)				No										Stongly Disagree	Stongly Disagree	Stongly Disagree		Yes	Agree	Agree	Agree	Agree	Strongly Agree	Strongly Agree	Agree	Agree													No
Yes	Yes - myself			Exercise & physical activity	Weight management	Medication (prescription only)								No										Disagree	Disagree	Disagree		Yes	Agree	Agree	Agree	Agree	Agree	Agree	Agree	Disagree	Unlikely	Neutral	Neutral	Neutral	Neutral	Neutral	Likely	Likely	Neither likely nor unlikely	Likely	Unlikely	Neither likely nor unlikely	No
Yes			No		Weight management	Medication (prescription only)	Medication (over the counter)	Physiotherapy	Nutrition as medicine (anti-inflammatory diet)	Supplements (e.g., Chondroitin, Glucosamine)		Surgery		No										Neither agree nor disagree	Neither agree nor disagree	Strongly Agree		Yes	Strongly Agree	Strongly Agree	Strongly Agree	Strongly Agree	Strongly Agree	Strongly Agree	Strongly Agree	Strongly Agree													No
Yes		Yes- I know someone		Exercise & physical activity	Weight management	Medication (prescription only)	Medication (over the counter)	Physiotherapy	Nutrition as medicine (anti-inflammatory diet)			Surgery		Yes	NHS (website)						Charities (e.g., Versus Arthritis, Arthritis Action)			Stongly Disagree	Stongly Disagree	Stongly Disagree		Yes	Neither agree nor disagree	Agree	Agree	Agree	Disagree	Agree	Agree	Agree													No
Yes	Yes - myself			Exercise & physical activity	Weight management			Physiotherapy						No										Disagree	Disagree	Disagree		Yes	Agree	Agree	Strongly Agree	Agree	Agree	Neither agree nor disagree	Agree	Agree	Unlikely	Neutral	Not at all interested	Slightly interested	Very interested	Slightly interested	Likely	Very Likely	Likely	Neither likely nor unlikely	Unlikely	Very Likely	No
Yes	Yes - myself			Exercise & physical activity	Weight management	Medication (prescription only)		Physiotherapy				Surgery		Yes	NHS (website)	NHS (doctor's advice)								Disagree	Disagree	Disagree		Yes	Agree	Agree	Agree	Disagree	Disagree	Agree	Disagree	Disagree	Unlikely	Slightly interested	Slightly interested	Neutral	Neutral	Not at all interested	Very Likely	Very Likely	Likely	Neither likely nor unlikely	Neither likely nor unlikely	Likely	Yes, please explain
Yes		Yes- I know someone			Weight management	Medication (prescription only)		Physiotherapy						No										Neither agree nor disagree	Neither agree nor disagree	Neither agree nor disagree		Yes	Agree	Strongly Agree	Agree	Neither agree nor disagree	Neither agree nor disagree	Agree	Agree	Agree													No
Yes		Yes- I know someone		Exercise & physical activity	Weight management					Supplements (e.g., Chondroitin, Glucosamine)				Yes					Blogs		Charities (e.g., Versus Arthritis, Arthritis Action)			Disagree	Disagree	Disagree		Yes	Strongly Agree	Strongly Agree	Strongly Agree	Strongly Agree	Strongly Agree	Strongly Agree	Strongly Agree	Strongly Agree													Yes, please explain
Yes		Yes- I know someone		Exercise & physical activity	Weight management	Medication (prescription only)	Medication (over the counter)	Physiotherapy	Nutrition as medicine (anti-inflammatory diet)	Supplements (e.g., Chondroitin, Glucosamine)		Surgery		Yes					Blogs			Other		Neither agree nor disagree	Neither agree nor disagree	Disagree		No	Neither agree nor disagree	Agree	Agree	Agree	Agree	Agree	Agree	Neither agree nor disagree													Yes, please explain
Yes	Yes - myself			Exercise & physical activity	Weight management		Medication (over the counter)	Physiotherapy				Surgery		No										Disagree	Disagree	Disagree		Yes	Neither agree nor disagree	Agree	Disagree	Agree	Neither agree nor disagree	Agree	Neither agree nor disagree	Agree	Very unlikely	Interested	Interested	Interested	Interested	Not at all interested	Unlikely	Very Likely	Likely	Neither likely nor unlikely	Very Unlikely	Very Unlikely	Yes, please explain
Yes		Yes- I know someone				Medication (prescription only)			Nutrition as medicine (anti-inflammatory diet)					No										Neither agree nor disagree	Neither agree nor disagree	Neither agree nor disagree		Yes	Agree	Agree	Neither agree nor disagree	Agree	Neither agree nor disagree	Agree	Agree	Neither agree nor disagree													No
Yes	Yes - myself			Exercise & physical activity				Physiotherapy	Nutrition as medicine (anti-inflammatory diet)	Supplements (e.g., Chondroitin, Glucosamine)				No										Neither agree nor disagree	Agree	Neither agree nor disagree		Yes	Agree	Strongly Agree	Disagree	Disagree	Disagree	Strongly Agree	Neither agree nor disagree	Disagree	Neutral	Interested	Interested	Very interested	Very interested	Neutral	Unlikely	Likely	Neither likely nor unlikely	Likely	Neither likely nor unlikely	Very Likely	No
Yes		Yes- I know someone				Medication (prescription only)								No										Neither agree nor disagree	Neither agree nor disagree	Agree		Yes	Strongly Agree	Strongly Agree	Agree	Agree	Strongly Agree	Agree	Agree	Agree													No
Yes		Yes- I know someone				Medication (prescription only)		Physiotherapy	Nutrition as medicine (anti-inflammatory diet)	Supplements (e.g., Chondroitin, Glucosamine)				Yes		NHS (doctor's advice)								Agree	Neither agree nor disagree	Disagree		Yes	Agree	Strongly Agree	Strongly Agree	Neither agree nor disagree	Strongly Agree	Neither agree nor disagree	Stongly Disagree	Stongly Disagree													No
Yes			No	Exercise & physical activity	Weight management	Medication (prescription only)		Physiotherapy	Nutrition as medicine (anti-inflammatory diet)			Surgery		No										Stongly Disagree	Stongly Disagree	Stongly Disagree		Yes	Agree	Agree	Strongly Agree	Neither agree nor disagree	Agree	Agree	Agree	Agree													No
Yes	Yes - myself			Exercise & physical activity	Weight management	Medication (prescription only)		Physiotherapy				Surgery		Yes	NHS (website)	NHS (doctor's advice)					Charities (e.g., Versus Arthritis, Arthritis Action)			Disagree	Disagree	Neither agree nor disagree		Yes	Strongly Agree	Strongly Agree	Neither agree nor disagree	Neither agree nor disagree	Strongly Agree	Strongly Agree	Strongly Agree	Strongly Agree	Likely	Very interested	Very interested	Very interested	Very interested	Very interested	Unlikely	Likely	Very Unlikely	Very Unlikely	Very Unlikely	Likely	No
Yes		Yes- I know someone		Exercise & physical activity	Weight management	Medication (prescription only)			Nutrition as medicine (anti-inflammatory diet)	Supplements (e.g., Chondroitin, Glucosamine)	Herbs			Yes					Blogs					Agree	Agree	Strongly Agree		Yes	Strongly Agree	Strongly Agree	Stongly Disagree	Agree	Strongly Agree	Strongly Agree	Neither agree nor disagree	Neither agree nor disagree													No
Yes		Yes- I know someone		Exercise & physical activity	Weight management	Medication (prescription only)	Medication (over the counter)	Physiotherapy	Nutrition as medicine (anti-inflammatory diet)			Surgery		Yes		NHS (doctor's advice)				A dietitian/ nutritionist				Agree	Agree	Agree		Yes	Agree	Agree	Neither agree nor disagree	Neither agree nor disagree	Agree	Neither agree nor disagree	Strongly Agree	Strongly Agree													No
Yes		Yes- I know someone				Medication (prescription only)		Physiotherapy						Yes	NHS (website)				Blogs	A dietitian/ nutritionist				Agree	Strongly Agree	Agree		Yes	Agree	Agree	Neither agree nor disagree	Agree	Strongly Agree	Agree	Agree	Neither agree nor disagree													No
Yes		Yes- I know someone		Exercise & physical activity		Medication (prescription only)		Physiotherapy						Yes		NHS (doctor's advice)								Neither agree nor disagree	Agree	Neither agree nor disagree		Yes	Agree	Agree	Agree	Agree	Agree	Agree	Agree	Agree													No
Yes		Yes- I know someone		Exercise & physical activity	Weight management	Medication (prescription only)		Physiotherapy	Nutrition as medicine (anti-inflammatory diet)					No										Disagree	Disagree	Agree		Yes	Agree	Agree	Agree	Agree	Agree	Agree	Agree	Agree													No
Yes		Yes- I know someone			Weight management					Supplements (e.g., Chondroitin, Glucosamine)				No										Agree	Neither agree nor disagree	Agree		Yes	Agree	Disagree	Disagree	Agree	Agree	Agree	Neither agree nor disagree	Strongly Agree													No
Yes			No	Exercise & physical activity		Medication (prescription only)			Nutrition as medicine (anti-inflammatory diet)	Supplements (e.g., Chondroitin, Glucosamine)				No										Agree	Disagree	Agree		Yes	Agree	Agree	Disagree	Disagree	Strongly Agree	Strongly Agree	Neither agree nor disagree	Neither agree nor disagree													No
Yes		Yes- I know someone		Exercise & physical activity		Medication (prescription only)				Supplements (e.g., Chondroitin, Glucosamine)				No										Disagree	Disagree	Disagree		Yes	Agree	Agree	Agree	Agree	Agree	Agree	Agree	Agree													No
Yes		Yes- I know someone		Exercise & physical activity	Weight management	Medication (prescription only)			Nutrition as medicine (anti-inflammatory diet)			Surgery		No										Agree	Agree	Agree		Yes	Strongly Agree	Strongly Agree	Agree	Neither agree nor disagree	Neither agree nor disagree	Strongly Agree	Agree	Agree													Yes, please explain
Yes			No										None of the above	No										Stongly Disagree	Stongly Disagree	Stongly Disagree		No	Stongly Disagree	Agree	Agree	Agree	Stongly Disagree	Neither agree nor disagree	Agree	Strongly Agree													No
Yes		Yes- I know someone		Exercise & physical activity				Physiotherapy		Supplements (e.g., Chondroitin, Glucosamine)				No										Disagree	Disagree	Stongly Disagree		Yes	Agree	Agree	Agree	Agree	Agree	Agree	Agree	Agree													Yes, please explain
Yes		Yes- I know someone											None of the above	No										Disagree	Disagree	Neither agree nor disagree		No	Agree	Strongly Agree	Neither agree nor disagree	Disagree	Agree	Strongly Agree	Neither agree nor disagree	Neither agree nor disagree													No
Yes	Yes - myself			Exercise & physical activity	Weight management	Medication (prescription only)		Physiotherapy						Yes	NHS (website)			Magazines (e.g., Women's/ Men's Health, Good Housekeeping)		A dietitian/ nutritionist	Charities (e.g., Versus Arthritis, Arthritis Action)			Neither agree nor disagree	Disagree	Neither agree nor disagree		Yes	Strongly Agree	Strongly Agree	Neither agree nor disagree	Agree	Strongly Agree	Strongly Agree	Strongly Agree	Neither agree nor disagree	Neutral	Very interested	Very interested	Very interested	Very interested	Interested	Neither likely nor unlikely	Very Likely	Unlikely	Neither likely nor unlikely	Unlikely	Neither likely nor unlikely	Yes, please explain
Yes			No			Medication (prescription only)				Supplements (e.g., Chondroitin, Glucosamine)				No										Stongly Disagree	Stongly Disagree	Agree		No	Agree	Agree	Agree	Agree	Agree	Agree	Agree	Agree													No
Yes	Yes - myself			Exercise & physical activity	Weight management	Medication (prescription only)				Supplements (e.g., Chondroitin, Glucosamine)				No										Disagree	Disagree	Disagree		No	Agree	Agree	Agree	Neither agree nor disagree	Neither agree nor disagree	Neither agree nor disagree	Agree	Neither agree nor disagree	Unlikely	Interested	Not at all interested	Not at all interested	Interested	Not at all interested	Unlikely	Very Likely	Unlikely	Unlikely	Very Unlikely	Unlikely	No
Yes	Yes - myself			Exercise & physical activity	Weight management	Medication (prescription only)		Physiotherapy						Yes	NHS (website)	NHS (doctor's advice)			Blogs					Disagree	Disagree	Neither agree nor disagree		Yes	Agree	Agree	Agree	Agree	Agree	Agree	Agree	Agree	Unlikely	Slightly interested	Not at all interested	Not at all interested	Slightly interested	Not at all interested	Likely	Likely	Neither likely nor unlikely	Likely	Likely	Neither likely nor unlikely	No
Yes		Yes- I know someone				Medication (prescription only)								No										Disagree	Disagree	Disagree		Yes	Agree	Agree	Agree	Agree	Agree	Agree	Agree	Neither agree nor disagree													Yes, please explain
Yes			No	Exercise & physical activity	Weight management						Herbs	Surgery		No										Stongly Disagree	Stongly Disagree	Stongly Disagree		Yes	Strongly Agree	Agree	Neither agree nor disagree	Agree	Agree	Agree	Neither agree nor disagree	Neither agree nor disagree													No
Yes	Yes - myself			Exercise & physical activity	Weight management	Medication (prescription only)	Medication (over the counter)	Physiotherapy		Supplements (e.g., Chondroitin, Glucosamine)		Surgery		Yes	NHS (website)	NHS (doctor's advice)				A dietitian/ nutritionist				Agree	Agree	Agree		Yes	Strongly Agree	Strongly Agree	Strongly Agree	Strongly Agree	Strongly Agree	Strongly Agree	Strongly Agree	Strongly Agree	Neutral	Neutral	Neutral	Neutral	Neutral	Neutral	Unlikely	Neither likely nor unlikely	Neither likely nor unlikely	Likely	Unlikely	Likely	No
Yes	Yes - myself			Exercise & physical activity	Weight management	Medication (prescription only)		Physiotherapy				Surgery		No										Stongly Disagree	Stongly Disagree	Stongly Disagree		Yes	Strongly Agree	Strongly Agree	Strongly Agree	Stongly Disagree	Strongly Agree	Strongly Agree	Strongly Agree	Strongly Agree	Unlikely	Very interested	Not at all interested	Very interested	Very interested	Not at all interested	Neither likely nor unlikely	Very Likely	Very Likely	Likely	Unlikely	Very Likely	No
Yes	Yes - myself			Exercise & physical activity	Weight management	Medication (prescription only)	Medication (over the counter)	Physiotherapy	Nutrition as medicine (anti-inflammatory diet)	Supplements (e.g., Chondroitin, Glucosamine)		Surgery		Yes						A dietitian/ nutritionist		Other	Doctor’s Home Cure for Arthritis (book)	Agree	Agree	Agree		Yes	Agree	Agree	Neither agree nor disagree	Neither agree nor disagree	Agree	Neither agree nor disagree	Strongly Agree	Disagree	Neutral	Slightly interested	Slightly interested	Neutral	Slightly interested	Slightly interested	Likely	Unlikely	Very Unlikely	Very Unlikely	Very Unlikely	Likely	No
Yes		Yes- I know someone		Exercise & physical activity	Weight management									No										Stongly Disagree	Stongly Disagree	Stongly Disagree		Yes	Strongly Agree	Strongly Agree	Strongly Agree	Strongly Agree	Strongly Agree	Strongly Agree	Strongly Agree	Strongly Agree													No
Yes		Yes- I know someone		Exercise & physical activity	Weight management	Medication (prescription only)	Medication (over the counter)	Physiotherapy		Supplements (e.g., Chondroitin, Glucosamine)				No										Disagree	Disagree	Disagree		No	Agree	Agree	Agree	Agree	Agree	Agree	Agree	Disagree													No
Yes		Yes- I know someone		Exercise & physical activity	Weight management	Medication (prescription only)		Physiotherapy		Supplements (e.g., Chondroitin, Glucosamine)		Surgery		No										Disagree	Disagree	Disagree		Yes	Agree	Neither agree nor disagree	Neither agree nor disagree	Agree	Agree	Agree	Agree	Neither agree nor disagree													No
Yes		Yes- I know someone		Exercise & physical activity	Weight management	Medication (prescription only)		Physiotherapy				Surgery		Yes	NHS (website)	NHS (doctor's advice)					Charities (e.g., Versus Arthritis, Arthritis Action)			Neither agree nor disagree	Neither agree nor disagree	Disagree		Yes	Agree	Agree	Neither agree nor disagree	Agree	Agree	Agree	Strongly Agree	Neither agree nor disagree													No
Yes		Yes- I know someone		Exercise & physical activity	Weight management	Medication (prescription only)		Physiotherapy						Yes	NHS (website)	NHS (doctor's advice)				A dietitian/ nutritionist				Agree	Neither agree nor disagree	Agree		Yes	Agree	Strongly Agree	Neither agree nor disagree	Neither agree nor disagree	Strongly Agree	Disagree	Agree	Disagree													No
Yes		Yes- I know someone		Exercise & physical activity		Medication (prescription only)			Nutrition as medicine (anti-inflammatory diet)					No										Disagree	Disagree	Disagree		Yes	Agree	Agree	Agree	Agree	Agree	Neither agree nor disagree	Agree	Neither agree nor disagree													No
Yes		Yes- I know someone				Medication (prescription only)		Physiotherapy				Surgery		No										Disagree	Disagree	Disagree		Yes	Agree	Agree	Neither agree nor disagree	Disagree	Agree	Agree	Agree	Agree													No
Yes			No	Exercise & physical activity	Weight management									No										Stongly Disagree	Stongly Disagree	Stongly Disagree		No	Agree	Agree	Agree	Neither agree nor disagree	Agree	Agree	Agree	Agree													No
Yes		Yes- I know someone		Exercise & physical activity	Weight management	Medication (prescription only)	Medication (over the counter)	Physiotherapy		Supplements (e.g., Chondroitin, Glucosamine)		Surgery		No										Disagree	Disagree	Disagree		Yes	Neither agree nor disagree	Agree	Agree	Agree	Disagree	Agree	Agree	Agree													Yes, please explain
Yes	Yes - myself			Exercise & physical activity		Medication (prescription only)				Supplements (e.g., Chondroitin, Glucosamine)				Yes		NHS (doctor's advice)				A dietitian/ nutritionist	Charities (e.g., Versus Arthritis, Arthritis Action)			Agree	Agree	Agree		Yes	Agree	Strongly Agree	Neither agree nor disagree	Disagree	Agree	Agree	Agree	Neither agree nor disagree	Neutral	Neutral	Interested	Neutral	Neutral	Neutral	Neither likely nor unlikely	Likely	Neither likely nor unlikely	Neither likely nor unlikely	Neither likely nor unlikely	Neither likely nor unlikely	No
Yes			No	Exercise & physical activity	Weight management	Medication (prescription only)	Medication (over the counter)	Physiotherapy	Nutrition as medicine (anti-inflammatory diet)	Supplements (e.g., Chondroitin, Glucosamine)				No										Disagree	Neither agree nor disagree	Disagree		Yes	Neither agree nor disagree	Agree	Agree	Strongly Agree	Agree	Strongly Agree	Neither agree nor disagree	Agree													No
Yes		Yes- I know someone		Exercise & physical activity	Weight management	Medication (prescription only)		Physiotherapy						No										Disagree	Disagree	Disagree		Yes	Agree	Agree	Agree	Agree	Agree	Agree	Agree	Agree													No
Yes	Yes - myself			Exercise & physical activity	Weight management	Medication (prescription only)		Physiotherapy	Nutrition as medicine (anti-inflammatory diet)	Supplements (e.g., Chondroitin, Glucosamine)				Yes	NHS (website)	NHS (doctor's advice)	BBC Food (website)							Agree	Agree	Neither agree nor disagree		Yes	Agree	Strongly Agree	Disagree	Disagree	Strongly Agree	Neither agree nor disagree	Disagree	Stongly Disagree	Very likely	Not at all interested	Not at all interested	Not at all interested	Interested	Not at all interested	Likely	Neither likely nor unlikely	Unlikely	Very Likely	Very Likely	Very Likely	No
Yes	Yes - myself			Exercise & physical activity	Weight management	Medication (prescription only)	Medication (over the counter)	Physiotherapy		Supplements (e.g., Chondroitin, Glucosamine)		Surgery		No										Agree	Agree	Neither agree nor disagree		Yes	Agree	Agree	Strongly Agree	Agree	Agree	Neither agree nor disagree	Agree	Agree	Unlikely	Neutral	Neutral	Neutral	Neutral	Not at all interested	Unlikely	Likely	Likely	Likely	Neither likely nor unlikely	Likely	No
Yes			No	Exercise & physical activity		Medication (prescription only)	Medication (over the counter)	Physiotherapy				Surgery		No										Stongly Disagree	Stongly Disagree	Disagree		No	Agree	Agree	Agree	Agree	Agree	Agree	Agree	Agree													No
Yes		Yes- I know someone		Exercise & physical activity	Weight management	Medication (prescription only)		Physiotherapy	Nutrition as medicine (anti-inflammatory diet)					No										Disagree	Disagree	Disagree		No	Agree	Strongly Agree	Agree	Agree	Agree	Strongly Agree	Agree	Agree													Yes, please explain
Yes	Yes - myself	Yes- I know someone		Exercise & physical activity		Medication (prescription only)		Physiotherapy		Supplements (e.g., Chondroitin, Glucosamine)				No										Disagree	Disagree	Disagree		Yes	Agree	Agree	Agree	Disagree	Agree	Agree	Agree	Agree	Unlikely	Slightly interested	Slightly interested	Slightly interested	Interested	Slightly interested	Likely	Very Likely	Likely	Very Likely	Very Likely	Likely	No
Yes	Yes - myself			Exercise & physical activity	Weight management	Medication (prescription only)		Physiotherapy	Nutrition as medicine (anti-inflammatory diet)	Supplements (e.g., Chondroitin, Glucosamine)		Surgery		Yes	NHS (website)						Charities (e.g., Versus Arthritis, Arthritis Action)			Agree	Disagree	Disagree		Yes	Strongly Agree	Agree	Strongly Agree	Agree	Agree	Agree	Agree	Neither agree nor disagree	Neutral	Slightly interested	Slightly interested	Neutral	Slightly interested	Interested	Very Unlikely	Neither likely nor unlikely	Unlikely	Unlikely	Very Unlikely	Unlikely	No
Yes	Yes - myself			Exercise & physical activity	Weight management	Medication (prescription only)								No										Neither agree nor disagree	Disagree	Disagree		Yes	Agree	Agree	Agree	Agree	Agree	Agree	Agree	Agree	Likely	Interested	Interested	Interested	Very interested	Neutral	Very Likely	Likely	Neither likely nor unlikely	Neither likely nor unlikely	Neither likely nor unlikely	Very Likely	No
Yes	Yes - myself					Medication (prescription only)	Medication (over the counter)	Physiotherapy				Surgery		No										Stongly Disagree	Stongly Disagree	Stongly Disagree		Yes	Strongly Agree	Agree	Neither agree nor disagree	Agree	Agree	Agree	Neither agree nor disagree	Strongly Agree	Very unlikely	Very interested	Very interested	Interested	Very interested	Very interested	Very Unlikely	Very Likely	Unlikely	Unlikely	Very Unlikely	Neither likely nor unlikely	No
Yes		Yes- I know someone		Exercise & physical activity	Weight management	Medication (prescription only)	Medication (over the counter)	Physiotherapy				Surgery		No										Agree	Agree	Stongly Disagree		No	Strongly Agree	Strongly Agree	Agree	Strongly Agree	Neither agree nor disagree	Strongly Agree	Strongly Agree	Agree													Yes, please explain
Yes		Yes- I know someone		Exercise & physical activity		Medication (prescription only)		Physiotherapy						No										Disagree	Disagree	Disagree		Yes	Neither agree nor disagree	Strongly Agree	Agree	Agree	Strongly Agree	Strongly Agree	Strongly Agree	Agree													No
Yes		Yes- I know someone		Exercise & physical activity	Weight management	Medication (prescription only)	Medication (over the counter)	Physiotherapy	Nutrition as medicine (anti-inflammatory diet)			Surgery		Yes	NHS (website)	NHS (doctor's advice)			Blogs					Agree	Agree	Agree		Yes	Agree	Agree	Disagree	Agree	Agree	Agree	Agree	Agree													Yes, please explain
Yes		Yes- I know someone		Exercise & physical activity	Weight management	Medication (prescription only)	Medication (over the counter)	Physiotherapy						No										Stongly Disagree	Stongly Disagree	Stongly Disagree		Yes	Strongly Agree	Agree	Disagree	Disagree	Strongly Agree	Neither agree nor disagree	Neither agree nor disagree	Stongly Disagree													Yes, please explain
Yes	Yes - myself			Exercise & physical activity	Weight management		Medication (over the counter)	Physiotherapy						Yes	NHS (website)	NHS (doctor's advice)		Magazines (e.g., Women's/ Men's Health, Good Housekeeping)						Neither agree nor disagree	Neither agree nor disagree	Neither agree nor disagree		Yes	Neither agree nor disagree	Neither agree nor disagree	Neither agree nor disagree	Neither agree nor disagree	Neither agree nor disagree	Neither agree nor disagree	Neither agree nor disagree	Neither agree nor disagree	Unlikely	Neutral	Slightly interested	Neutral	Interested	Interested	Neither likely nor unlikely	Neither likely nor unlikely	Likely	Neither likely nor unlikely	Neither likely nor unlikely	Neither likely nor unlikely	No
Yes			No	Exercise & physical activity	Weight management	Medication (prescription only)			Nutrition as medicine (anti-inflammatory diet)					No										Disagree	Disagree	Agree		Yes	Agree	Agree	Agree	Disagree	Disagree	Disagree	Agree	Disagree													Yes, please explain
Yes	Yes - myself	Yes- I know someone		Exercise & physical activity	Weight management	Medication (prescription only)		Physiotherapy		Supplements (e.g., Chondroitin, Glucosamine)				Yes	NHS (website)			Magazines (e.g., Women's/ Men's Health, Good Housekeeping)			Charities (e.g., Versus Arthritis, Arthritis Action)			Agree	Agree	Agree		Yes	Agree	Neither agree nor disagree	Agree	Agree	Agree	Agree	Neither agree nor disagree	Neither agree nor disagree	Likely	Neutral	Not at all interested	Slightly interested	Neutral	Slightly interested	Unlikely	Unlikely	Neither likely nor unlikely	Neither likely nor unlikely	Neither likely nor unlikely	Unlikely	No
Yes		Yes- I know someone		Exercise & physical activity	Weight management		Medication (over the counter)			Supplements (e.g., Chondroitin, Glucosamine)				No										Disagree	Disagree	Disagree		Yes	Agree	Agree	Agree	Neither agree nor disagree	Agree	Agree	Agree	Agree													Yes, please explain
Yes		Yes- I know someone		Exercise & physical activity		Medication (prescription only)		Physiotherapy						No										Disagree	Disagree	Disagree		Yes	Agree	Neither agree nor disagree	Agree	Neither agree nor disagree	Neither agree nor disagree	Agree	Agree	Neither agree nor disagree													No
Yes	Yes - myself			Exercise & physical activity		Medication (prescription only)	Medication (over the counter)	Physiotherapy				Surgery		Yes	NHS (website)						Charities (e.g., Versus Arthritis, Arthritis Action)			Neither agree nor disagree	Disagree	Strongly Agree		Yes	Neither agree nor disagree	Disagree	Disagree	Agree	Neither agree nor disagree	Agree	Agree	Agree	Unlikely	Slightly interested	Slightly interested	Slightly interested	Slightly interested	Not at all interested	Unlikely	Likely	Unlikely	Neither likely nor unlikely	Very Unlikely	Very Unlikely	Yes, please explain
Yes	Yes - myself			Exercise & physical activity			Medication (over the counter)	Physiotherapy		Supplements (e.g., Chondroitin, Glucosamine)				No										Disagree	Disagree	Disagree		No	Neither agree nor disagree	Agree	Disagree	Disagree	Strongly Agree	Agree	Disagree	Stongly Disagree	Very unlikely	Slightly interested	Not at all interested	Not at all interested	Slightly interested	Not at all interested	Likely	Very Likely	Likely	Likely	Neither likely nor unlikely	Neither likely nor unlikely	No
Yes		Yes- I know someone		Exercise & physical activity	Weight management	Medication (prescription only)		Physiotherapy	Nutrition as medicine (anti-inflammatory diet)	Supplements (e.g., Chondroitin, Glucosamine)	Herbs	Surgery		Yes					Blogs			Other	Online generally	Agree	Agree	Agree		Yes	Strongly Agree	Strongly Agree	Agree	Agree	Strongly Agree	Strongly Agree	Strongly Agree	Agree													Yes, please explain
Yes	Yes - myself					Medication (prescription only)		Physiotherapy	Nutrition as medicine (anti-inflammatory diet)	Supplements (e.g., Chondroitin, Glucosamine)				Yes	NHS (website)	NHS (doctor's advice)								Neither agree nor disagree	Agree	Agree		Yes	Agree	Agree	Agree	Agree	Agree	Agree	Agree	Neither agree nor disagree	Unlikely	Interested	Interested	Interested	Interested	Interested	Likely	Very Likely	Likely	Likely	Neither likely nor unlikely	Likely	No
Yes	Yes - myself			Exercise & physical activity	Weight management		Medication (over the counter)			Supplements (e.g., Chondroitin, Glucosamine)		Surgery		No										Disagree	Disagree	Disagree		Yes	Agree	Agree	Disagree	Agree	Strongly Agree	Agree	Agree	Disagree	Unlikely	Interested	Slightly interested	Neutral	Interested	Not at all interested	Very Likely	Very Likely	Unlikely	Likely	Very Unlikely	Likely	No
Yes		Yes- I know someone				Medication (prescription only)								No										Agree	Neither agree nor disagree	Neither agree nor disagree		Yes	Agree	Agree	Disagree	Disagree	Agree	Agree	Agree	Agree													No
Yes	Yes - myself			Exercise & physical activity	Weight management	Medication (prescription only)	Medication (over the counter)	Physiotherapy	Nutrition as medicine (anti-inflammatory diet)	Supplements (e.g., Chondroitin, Glucosamine)		Surgery		Yes	NHS (website)						Charities (e.g., Versus Arthritis, Arthritis Action)			Neither agree nor disagree	Disagree	Disagree		Yes	Strongly Agree	Strongly Agree	Disagree	Agree	Strongly Agree	Agree	Agree	Agree	Likely	Very interested	Neutral	Neutral	Not at all interested	Interested	Very Unlikely	Likely	Unlikely	Very Unlikely	Very Unlikely	Neither likely nor unlikely	No
Yes	Yes - myself			Exercise & physical activity	Weight management	Medication (prescription only)	Medication (over the counter)			Supplements (e.g., Chondroitin, Glucosamine)				No										Neither agree nor disagree	Agree	Neither agree nor disagree		Yes	Agree	Agree	Neither agree nor disagree	Agree	Strongly Agree	Agree	Agree	Disagree	Very unlikely	Slightly interested	Slightly interested	Neutral	Slightly interested	Not at all interested	Neither likely nor unlikely	Likely	Unlikely	Unlikely	Very Unlikely	Likely	No
Yes			No	Exercise & physical activity										No										Stongly Disagree	Stongly Disagree	Stongly Disagree		No	Neither agree nor disagree	Agree	Agree	Agree	Neither agree nor disagree	Agree	Neither agree nor disagree	Neither agree nor disagree													No
Yes		Yes- I know someone		Exercise & physical activity	Weight management	Medication (prescription only)		Physiotherapy				Surgery		No										Disagree	Disagree	Neither agree nor disagree		No	Strongly Agree	Strongly Agree	Agree	Strongly Agree	Strongly Agree	Strongly Agree	Strongly Agree	Neither agree nor disagree													No
Yes	Yes - myself			Exercise & physical activity	Weight management	Medication (prescription only)		Physiotherapy				Surgery		No										Disagree	Disagree	Disagree		Yes	Agree	Agree	Neither agree nor disagree	Neither agree nor disagree	Agree	Agree	Agree	Neither agree nor disagree	Unlikely	Interested	Interested	Interested	Interested	Interested	Unlikely	Likely	Neither likely nor unlikely	Unlikely	Very Unlikely	Neither likely nor unlikely	No
Yes		Yes- I know someone		Exercise & physical activity	Weight management	Medication (prescription only)		Physiotherapy	Nutrition as medicine (anti-inflammatory diet)					No										Disagree	Neither agree nor disagree	Disagree		Yes	Agree	Agree	Disagree	Agree	Neither agree nor disagree	Agree	Agree	Neither agree nor disagree													No
Yes	Yes - myself				Weight management	Medication (prescription only)	Medication (over the counter)	Physiotherapy	Nutrition as medicine (anti-inflammatory diet)	Supplements (e.g., Chondroitin, Glucosamine)		Surgery		Yes								Other	My spouse	Neither agree nor disagree	Neither agree nor disagree	Agree		Yes	Agree	Strongly Agree	Agree	Agree	Neither agree nor disagree	Neither agree nor disagree	Neither agree nor disagree	Agree	Likely	Interested	Interested	Interested	Very interested	Neutral	Unlikely	Likely	Unlikely	Neither likely nor unlikely	Unlikely	Unlikely	No
Yes			No	Exercise & physical activity	Weight management	Medication (prescription only)		Physiotherapy	Nutrition as medicine (anti-inflammatory diet)	Supplements (e.g., Chondroitin, Glucosamine)		Surgery		No										Disagree	Disagree	Disagree		Yes	Agree	Strongly Agree	Agree	Agree	Agree	Agree	Agree	Agree													No
Yes	Yes - myself	Yes- I know someone		Exercise & physical activity	Weight management	Medication (prescription only)	Medication (over the counter)	Physiotherapy		Supplements (e.g., Chondroitin, Glucosamine)		Surgery		Yes	NHS (website)	NHS (doctor's advice)		Magazines (e.g., Women's/ Men's Health, Good Housekeeping)			Charities (e.g., Versus Arthritis, Arthritis Action)			Agree	Agree	Neither agree nor disagree		Yes	Agree	Agree	Agree	Strongly Agree	Neither agree nor disagree	Agree	Neither agree nor disagree	Agree	Very likely	Very interested	Interested	Interested	Very interested	Interested	Likely	Neither likely nor unlikely	Neither likely nor unlikely	Likely	Likely	Likely	Yes, please explain
Yes		Yes- I know someone		Exercise & physical activity	Weight management	Medication (prescription only)								No										Disagree	Disagree	Disagree		Yes	Strongly Agree	Strongly Agree	Neither agree nor disagree	Neither agree nor disagree	Neither agree nor disagree	Strongly Agree	Agree	Neither agree nor disagree													No
Yes	Yes - myself			Exercise & physical activity	Weight management	Medication (prescription only)	Medication (over the counter)	Physiotherapy	Nutrition as medicine (anti-inflammatory diet)	Supplements (e.g., Chondroitin, Glucosamine)	Herbs			Yes	NHS (website)	NHS (doctor's advice)			Blogs	A dietitian/ nutritionist				Agree	Agree	Strongly Agree		Yes	Strongly Agree	Strongly Agree	Strongly Agree	Strongly Agree	Strongly Agree	Strongly Agree	Strongly Agree	Strongly Agree	Very likely	Very interested	Very interested	Very interested	Very interested	Very interested	Very Likely	Neither likely nor unlikely	Neither likely nor unlikely	Very Likely	Likely	Very Likely	No
Yes		Yes- I know someone				Medication (prescription only)								No										Disagree	Disagree	Stongly Disagree		Yes	Agree	Agree	Agree	Agree	Agree	Agree	Agree	Agree													Yes, please explain
Yes		Yes- I know someone				Medication (prescription only)				Supplements (e.g., Chondroitin, Glucosamine)				No										Disagree	Disagree	Neither agree nor disagree		Yes	Agree	Agree	Agree	Agree	Agree	Agree	Agree	Agree													No
Yes	Yes - myself			Exercise & physical activity	Weight management	Medication (prescription only)	Medication (over the counter)	Physiotherapy	Nutrition as medicine (anti-inflammatory diet)	Supplements (e.g., Chondroitin, Glucosamine)		Surgery		Yes	NHS (website)	NHS (doctor's advice)		Magazines (e.g., Women's/ Men's Health, Good Housekeeping)	Blogs					Agree	Neither agree nor disagree	Neither agree nor disagree		Yes	Agree	Agree	Agree	Agree	Agree	Agree	Agree	Agree	Neutral	Interested	Slightly interested	Slightly interested	Very interested	Neutral	Likely	Neither likely nor unlikely	Neither likely nor unlikely	Neither likely nor unlikely	Very Unlikely	Likely	No
Yes			No	Exercise & physical activity	Weight management	Medication (prescription only)		Physiotherapy	Nutrition as medicine (anti-inflammatory diet)					No										Neither agree nor disagree	Neither agree nor disagree	Agree		Yes	Agree	Agree	Agree	Agree	Agree	Agree	Agree	Agree													No
Yes		Yes- I know someone		Exercise & physical activity	Weight management									No										Neither agree nor disagree	Neither agree nor disagree	Disagree		Yes	Agree	Agree	Neither agree nor disagree	Agree	Agree	Agree	Agree	Neither agree nor disagree													No
Yes			No			Medication (prescription only)								No										Stongly Disagree	Stongly Disagree	Stongly Disagree		No	Agree	Agree	Agree	Agree	Neither agree nor disagree	Neither agree nor disagree	Agree	Neither agree nor disagree													No
Yes			No	Exercise & physical activity		Medication (prescription only)		Physiotherapy		Supplements (e.g., Chondroitin, Glucosamine)				No										Disagree	Disagree	Disagree		Yes	Strongly Agree	Strongly Agree	Neither agree nor disagree	Disagree	Strongly Agree	Strongly Agree	Agree	Neither agree nor disagree													No
Yes	Yes - myself				Weight management			Physiotherapy						No										Agree	Disagree	Neither agree nor disagree		Yes	Agree	Strongly Agree	Agree	Agree	Strongly Agree	Agree	Agree	Disagree	Unlikely	Interested	Neutral	Neutral	Very interested	Neutral	Likely	Very Likely	Very Unlikely	Very Unlikely	Very Unlikely	Unlikely	No
Yes	Yes - myself			Exercise & physical activity	Weight management	Medication (prescription only)	Medication (over the counter)	Physiotherapy	Nutrition as medicine (anti-inflammatory diet)	Supplements (e.g., Chondroitin, Glucosamine)				No										Disagree	Neither agree nor disagree	Neither agree nor disagree		No	Agree	Strongly Agree	Agree	Agree	Strongly Agree	Strongly Agree	Neither agree nor disagree	Stongly Disagree	Unlikely	Neutral	Neutral	Neutral	Not at all interested	Slightly interested	Likely	Very Likely	Unlikely	Very Unlikely	Neither likely nor unlikely	Very Likely	No
Yes		Yes- I know someone		Exercise & physical activity	Weight management			Physiotherapy	Nutrition as medicine (anti-inflammatory diet)					No										Agree	Agree	Agree		Yes	Strongly Agree	Strongly Agree	Disagree	Neither agree nor disagree	Agree	Strongly Agree	Agree	Disagree													No
Yes		Yes- I know someone			Weight management	Medication (prescription only)			Nutrition as medicine (anti-inflammatory diet)	Supplements (e.g., Chondroitin, Glucosamine)		Surgery		No										Disagree	Disagree	Neither agree nor disagree		Yes	Neither agree nor disagree	Agree	Agree	Disagree	Agree	Agree	Agree	Agree													Yes, please explain
Yes		Yes- I know someone				Medication (prescription only)				Supplements (e.g., Chondroitin, Glucosamine)		Surgery		No										Disagree	Disagree	Agree		Yes	Agree	Agree	Agree	Agree	Agree	Agree	Agree	Disagree													Yes, please explain
Yes	Yes - myself				Weight management	Medication (prescription only)			Nutrition as medicine (anti-inflammatory diet)	Supplements (e.g., Chondroitin, Glucosamine)				Yes					Blogs					Disagree	Disagree	Disagree		Yes	Agree	Agree	Agree	Agree	Agree	Agree	Neither agree nor disagree	Disagree	Unlikely	Interested	Interested	Interested	Very interested	Slightly interested	Very Unlikely	Very Likely	Neither likely nor unlikely	Unlikely	Very Unlikely	Very Unlikely	No
Yes	Yes - myself			Exercise & physical activity	Weight management	Medication (prescription only)	Medication (over the counter)	Physiotherapy	Nutrition as medicine (anti-inflammatory diet)	Supplements (e.g., Chondroitin, Glucosamine)	Herbs	Surgery		Yes	NHS (website)	NHS (doctor's advice)		Magazines (e.g., Women's/ Men's Health, Good Housekeeping)	Blogs					Agree	Agree	Neither agree nor disagree		Yes	Strongly Agree	Strongly Agree	Agree	Agree	Strongly Agree	Strongly Agree	Strongly Agree	Agree	Neutral	Neutral	Neutral	Neutral	Interested	Slightly interested	Unlikely	Neither likely nor unlikely	Unlikely	Unlikely	Unlikely	Neither likely nor unlikely	No
Yes		Yes- I know someone			Weight management	Medication (prescription only)	Medication (over the counter)	Physiotherapy						No										Neither agree nor disagree	Disagree	Disagree		Yes	Agree	Agree	Neither agree nor disagree	Agree	Strongly Agree	Agree	Agree	Agree													Yes, please explain
Yes	Yes - myself			Exercise & physical activity	Weight management	Medication (prescription only)			Nutrition as medicine (anti-inflammatory diet)					Yes	NHS (website)									Agree	Agree	Agree		Yes	Strongly Agree	Agree	Disagree	Agree	Agree	Agree	Agree	Neither agree nor disagree	Neutral	Neutral	Neutral	Neutral	Neutral	Neutral	Unlikely	Likely	Unlikely	Neither likely nor unlikely	Very Unlikely	Likely	No
Yes		Yes- I know someone		Exercise & physical activity	Weight management	Medication (prescription only)								No										Agree	Agree	Neither agree nor disagree		Yes	Agree	Strongly Agree	Strongly Agree	Strongly Agree	Agree	Agree	Agree	Agree													No
Yes		Yes- I know someone		Exercise & physical activity	Weight management	Medication (prescription only)				Supplements (e.g., Chondroitin, Glucosamine)				No										Stongly Disagree	Stongly Disagree	Stongly Disagree		Yes	Agree	Strongly Agree	Neither agree nor disagree	Neither agree nor disagree	Neither agree nor disagree	Agree	Agree	Disagree													Yes, please explain
Yes	Yes - myself			Exercise & physical activity	Weight management	Medication (prescription only)	Medication (over the counter)	Physiotherapy		Supplements (e.g., Chondroitin, Glucosamine)		Surgery		No										Disagree	Disagree	Disagree		Yes	Strongly Agree	Agree	Neither agree nor disagree	Agree	Strongly Agree	Agree	Agree	Strongly Agree	Neutral	Neutral	Neutral	Neutral	Not at all interested	Neutral	Likely	Very Likely	Neither likely nor unlikely	Neither likely nor unlikely	Very Unlikely	Neither likely nor unlikely	No
Yes			No	Exercise & physical activity	Weight management	Medication (prescription only)								No										Disagree	Neither agree nor disagree	Neither agree nor disagree		Yes	Agree	Strongly Agree	Agree	Neither agree nor disagree	Neither agree nor disagree	Agree	Agree	Agree													No
Yes		Yes- I know someone				Medication (prescription only)		Physiotherapy	Nutrition as medicine (anti-inflammatory diet)					No										Disagree	Disagree	Agree		Yes	Neither agree nor disagree	Agree	Agree	Neither agree nor disagree	Agree	Agree	Agree	Neither agree nor disagree													No
Yes	Yes - myself			Exercise & physical activity		Medication (prescription only)		Physiotherapy				Surgery		Yes	NHS (website)	NHS (doctor's advice)								Disagree	Disagree	Stongly Disagree		Yes	Agree	Agree	Agree	Agree	Agree	Agree	Agree	Agree	Unlikely	Interested	Interested	Interested	Very interested	Interested	Likely	Very Likely	Unlikely	Neither likely nor unlikely	Neither likely nor unlikely	Likely	No
Yes	Yes - myself	Yes- I know someone		Exercise & physical activity	Weight management	Medication (prescription only)	Medication (over the counter)	Physiotherapy	Nutrition as medicine (anti-inflammatory diet)	Supplements (e.g., Chondroitin, Glucosamine)		Surgery		Yes	NHS (website)	NHS (doctor's advice)					Charities (e.g., Versus Arthritis, Arthritis Action)			Agree	Agree	Neither agree nor disagree		Yes	Agree	Strongly Agree	Agree	Strongly Agree	Strongly Agree	Strongly Agree	Strongly Agree	Agree	Very likely	Interested	Interested	Interested	Interested	Interested	Neither likely nor unlikely	Unlikely	Unlikely	Unlikely	Likely	Likely	No
Yes	Yes - myself			Exercise & physical activity	Weight management	Medication (prescription only)		Physiotherapy		Supplements (e.g., Chondroitin, Glucosamine)		Surgery		Yes	NHS (website)	NHS (doctor's advice)								Agree	Agree	Agree		Yes	Agree	Strongly Agree	Stongly Disagree	Agree	Agree	Agree	Agree	Strongly Agree	Neutral	Slightly interested	Slightly interested	Slightly interested	Slightly interested	Slightly interested	Very Unlikely	Unlikely	Unlikely	Unlikely	Unlikely	Unlikely	No
Yes	Yes - myself			Exercise & physical activity		Medication (prescription only)		Physiotherapy				Surgery		No										Stongly Disagree	Stongly Disagree	Stongly Disagree		No	Agree	Agree	Disagree	Stongly Disagree	Agree	Neither agree nor disagree	Agree	Disagree	Very unlikely	Neutral	Neutral	Neutral	Not at all interested	Neutral	Very Unlikely	Very Likely	Unlikely	Neither likely nor unlikely	Neither likely nor unlikely	Very Likely	No
Yes			No	Exercise & physical activity	Weight management				Nutrition as medicine (anti-inflammatory diet)					Yes	NHS (website)									Agree	Disagree	Disagree		Yes	Agree	Agree	Agree	Agree	Agree	Agree	Agree	Agree													No
Yes		Yes- I know someone		Exercise & physical activity	Weight management	Medication (prescription only)		Physiotherapy		Supplements (e.g., Chondroitin, Glucosamine)		Surgery		No										Agree	Disagree	Neither agree nor disagree		Yes	Agree	Agree	Agree	Agree	Agree	Agree	Agree	Agree													No
Yes			No			Medication (prescription only)								No										Stongly Disagree	Stongly Disagree	Agree		No	Agree	Agree	Agree	Agree	Disagree	Agree	Agree	Neither agree nor disagree													No
Yes	Yes - myself				Weight management	Medication (prescription only)	Medication (over the counter)		Nutrition as medicine (anti-inflammatory diet)	Supplements (e.g., Chondroitin, Glucosamine)	Herbs			No										Agree	Disagree	Neither agree nor disagree		Yes	Strongly Agree	Strongly Agree	Strongly Agree	Strongly Agree	Strongly Agree	Strongly Agree	Strongly Agree	Strongly Agree	Neutral	Very interested	Very interested	Very interested	Very interested	Very interested	Very Likely	Very Likely	Neither likely nor unlikely	Very Likely	Very Likely	Very Likely	No
Yes		Yes- I know someone		Exercise & physical activity	Weight management	Medication (prescription only)		Physiotherapy						Yes	NHS (website)	NHS (doctor's advice)	BBC Food (website)	Magazines (e.g., Women's/ Men's Health, Good Housekeeping)		A dietitian/ nutritionist				Agree	Neither agree nor disagree	Disagree		Yes	Disagree	Neither agree nor disagree	Neither agree nor disagree	Neither agree nor disagree	Disagree	Disagree	Disagree	Disagree													No
Yes	Yes - myself			Exercise & physical activity	Weight management				Nutrition as medicine (anti-inflammatory diet)			Surgery		Yes	NHS (website)						Charities (e.g., Versus Arthritis, Arthritis Action)	Other	internet browsing	Agree	Neither agree nor disagree	Agree		Yes	Agree	Agree	Agree	Disagree	Neither agree nor disagree	Neither agree nor disagree	Strongly Agree	Strongly Agree	Unlikely	Neutral	Neutral	Neutral	Neutral	Not at all interested	Unlikely	Neither likely nor unlikely	Very Unlikely	Neither likely nor unlikely	Very Unlikely	Unlikely	No
Yes		Yes- I know someone		Exercise & physical activity	Weight management	Medication (prescription only)	Medication (over the counter)							No										Disagree	Disagree	Disagree		Yes	Agree	Agree	Agree	Neither agree nor disagree	Agree	Strongly Agree	Neither agree nor disagree	Neither agree nor disagree													No
Yes	Yes - myself	Yes- I know someone		Exercise & physical activity	Weight management									Yes	NHS (website)	NHS (doctor's advice)	BBC Food (website)		Blogs	A dietitian/ nutritionist				Disagree	Disagree	Agree		Yes	Strongly Agree	Strongly Agree	Strongly Agree	Strongly Agree	Strongly Agree	Strongly Agree	Strongly Agree	Disagree	Likely	Interested	Interested	Interested	Interested	Not at all interested	Very Likely	Very Likely	Very Unlikely	Likely	Likely	Very Likely	No
Yes		Yes- I know someone								Supplements (e.g., Chondroitin, Glucosamine)				No										Stongly Disagree	Agree	Stongly Disagree		Yes	Strongly Agree	Strongly Agree	Strongly Agree	Strongly Agree	Strongly Agree	Strongly Agree	Strongly Agree	Strongly Agree													No
Yes		Yes- I know someone		Exercise & physical activity	Weight management	Medication (prescription only)			Nutrition as medicine (anti-inflammatory diet)	Supplements (e.g., Chondroitin, Glucosamine)		Surgery		Yes	NHS (website)	NHS (doctor's advice)						Other	Physiotherapist	Agree	Agree	Agree		Yes	Strongly Agree	Strongly Agree	Agree	Agree	Strongly Agree	Strongly Agree	Agree	Agree													Yes, please explain
Yes	Yes - myself			Exercise & physical activity	Weight management	Medication (prescription only)		Physiotherapy		Supplements (e.g., Chondroitin, Glucosamine)		Surgery		No										Disagree	Disagree	Disagree		Yes	Strongly Agree	Agree	Neither agree nor disagree	Agree	Strongly Agree	Strongly Agree	Strongly Agree	Strongly Agree	Unlikely	Very interested	Very interested	Interested	Very interested	Very interested	Unlikely	Very Likely	Likely	Likely	Very Unlikely	Neither likely nor unlikely	No
Yes		Yes- I know someone		Exercise & physical activity	Weight management	Medication (prescription only)	Medication (over the counter)	Physiotherapy	Nutrition as medicine (anti-inflammatory diet)	Supplements (e.g., Chondroitin, Glucosamine)	Herbs	Surgery		Yes	NHS (website)					A dietitian/ nutritionist				Agree	Agree	Strongly Agree		Yes	Strongly Agree	Strongly Agree	Agree	Agree	Agree	Agree	Strongly Agree	Agree													Yes, please explain
Yes	Yes - myself	Yes- I know someone		Exercise & physical activity	Weight management	Medication (prescription only)		Physiotherapy		Supplements (e.g., Chondroitin, Glucosamine)				No										Stongly Disagree	Stongly Disagree	Stongly Disagree		Yes	Neither agree nor disagree	Agree	Neither agree nor disagree	Agree	Agree	Neither agree nor disagree	Agree	Neither agree nor disagree	Unlikely	Interested	Interested	Interested	Interested	Neutral	Very Likely	Very Likely	Neither likely nor unlikely	Unlikely	Unlikely	Likely	Yes, please explain
Yes		Yes- I know someone		Exercise & physical activity	Weight management	Medication (prescription only)	Medication (over the counter)		Nutrition as medicine (anti-inflammatory diet)	Supplements (e.g., Chondroitin, Glucosamine)				No										Disagree	Disagree	Disagree		Yes	Agree	Strongly Agree	Neither agree nor disagree	Disagree	Agree	Agree	Agree	Agree													No
Yes		Yes- I know someone				Medication (prescription only)								No										Disagree	Neither agree nor disagree	Disagree		No	Neither agree nor disagree	Disagree	Agree	Agree	Neither agree nor disagree	Neither agree nor disagree	Neither agree nor disagree	Neither agree nor disagree													No
Yes			No	Exercise & physical activity	Weight management	Medication (prescription only)		Physiotherapy	Nutrition as medicine (anti-inflammatory diet)	Supplements (e.g., Chondroitin, Glucosamine)				No										Agree	Agree	Agree		Yes	Agree	Agree	Neither agree nor disagree	Agree	Agree	Agree	Neither agree nor disagree	Neither agree nor disagree													Yes, please explain
Yes			No	Exercise & physical activity				Physiotherapy						No										Stongly Disagree	Stongly Disagree	Stongly Disagree		No	Agree	Agree	Strongly Agree	Strongly Agree	Strongly Agree	Agree	Agree	Strongly Agree													Yes, please explain
Yes	Yes - myself					Medication (prescription only)						Surgery		No										Stongly Disagree	Stongly Disagree	Stongly Disagree		No	Agree	Neither agree nor disagree	Agree	Agree	Strongly Agree	Agree	Agree	Neither agree nor disagree	Very unlikely	Interested	Interested	Interested	Neutral	Neutral	Neither likely nor unlikely	Very Likely	Likely	Neither likely nor unlikely	Neither likely nor unlikely	Likely	Yes, please explain
Yes	Yes - myself			Exercise & physical activity	Weight management	Medication (prescription only)	Medication (over the counter)	Physiotherapy	Nutrition as medicine (anti-inflammatory diet)	Supplements (e.g., Chondroitin, Glucosamine)	Herbs	Surgery		No										Agree	Neither agree nor disagree	Disagree		No	Agree	Agree	Agree	Agree	Strongly Agree	Agree	Agree	Agree	Unlikely	Interested	Neutral	Neutral	Interested	Not at all interested	Likely	Likely	Very Likely	Likely	Neither likely nor unlikely	Likely	Yes, please explain
Yes	Yes - myself			Exercise & physical activity	Weight management	Medication (prescription only)	Medication (over the counter)	Physiotherapy	Nutrition as medicine (anti-inflammatory diet)			Surgery		Yes	NHS (website)						Charities (e.g., Versus Arthritis, Arthritis Action)			Neither agree nor disagree	Disagree	Agree		Yes	Agree	Strongly Agree	Disagree	Agree	Agree	Strongly Agree	Strongly Agree	Strongly Agree	Neutral	Slightly interested	Not at all interested	Not at all interested	Slightly interested	Slightly interested	Very Likely	Likely	Unlikely	Likely	Unlikely	Very Likely	No
Yes	Yes - myself			Exercise & physical activity	Weight management		Medication (over the counter)	Physiotherapy		Supplements (e.g., Chondroitin, Glucosamine)		Surgery		Yes	NHS (website)	NHS (doctor's advice)	BBC Food (website)				Charities (e.g., Versus Arthritis, Arthritis Action)			Agree	Agree	Neither agree nor disagree		Yes	Agree	Agree	Agree	Agree	Agree	Agree	Neither agree nor disagree	Strongly Agree	Neutral	Slightly interested	Slightly interested	Slightly interested	Neutral	Neutral	Neither likely nor unlikely	Neither likely nor unlikely	Unlikely	Neither likely nor unlikely	Neither likely nor unlikely	Neither likely nor unlikely	Yes, please explain
Yes			No	Exercise & physical activity						Supplements (e.g., Chondroitin, Glucosamine)				Yes	NHS (website)									Disagree	Stongly Disagree	Disagree		Yes	Agree	Strongly Agree	Agree	Agree	Agree	Strongly Agree	Agree	Agree													No
Yes		Yes- I know someone			Weight management	Medication (prescription only)	Medication (over the counter)	Physiotherapy				Surgery		No										Agree	Disagree	Disagree		Yes	Agree	Agree	Strongly Agree	Agree	Strongly Agree	Agree	Agree	Neither agree nor disagree													No
Yes		Yes- I know someone		Exercise & physical activity	Weight management	Medication (prescription only)	Medication (over the counter)	Physiotherapy	Nutrition as medicine (anti-inflammatory diet)	Supplements (e.g., Chondroitin, Glucosamine)		Surgery		Yes	NHS (website)									Agree	Disagree	Disagree		Yes	Agree	Strongly Agree	Disagree	Disagree	Disagree	Strongly Agree	Agree	Stongly Disagree													Yes, please explain
Yes	Yes - myself	Yes- I know someone		Exercise & physical activity	Weight management	Medication (prescription only)	Medication (over the counter)	Physiotherapy	Nutrition as medicine (anti-inflammatory diet)	Supplements (e.g., Chondroitin, Glucosamine)				Yes	NHS (website)	NHS (doctor's advice)								Neither agree nor disagree	Neither agree nor disagree	Disagree		Yes	Strongly Agree	Strongly Agree	Agree	Agree	Agree	Strongly Agree	Agree	Agree	Very likely	Interested	Interested	Interested	Interested	Interested	Unlikely	Likely	Very Unlikely	Neither likely nor unlikely	Very Unlikely	Likely	No
Yes			No										None of the above	No										Disagree	Stongly Disagree	Disagree		Yes	Agree	Agree	Agree	Agree	Agree	Agree	Agree	Agree													Yes, please explain
Yes			No	Exercise & physical activity	Weight management	Medication (prescription only)		Physiotherapy	Nutrition as medicine (anti-inflammatory diet)	Supplements (e.g., Chondroitin, Glucosamine)				Yes					Blogs					Agree	Disagree	Neither agree nor disagree		Yes	Agree	Agree	Stongly Disagree	Stongly Disagree	Strongly Agree	Strongly Agree	Disagree	Stongly Disagree													Yes, please explain
Yes			No	Exercise & physical activity	Weight management	Medication (prescription only)	Medication (over the counter)	Physiotherapy	Nutrition as medicine (anti-inflammatory diet)	Supplements (e.g., Chondroitin, Glucosamine)	Herbs	Surgery		No										Disagree	Disagree	Stongly Disagree		No	Stongly Disagree	Neither agree nor disagree	Strongly Agree	Neither agree nor disagree	Stongly Disagree	Disagree	Strongly Agree	Agree													No
Yes	Yes - myself			Exercise & physical activity		Medication (prescription only)		Physiotherapy						No										Disagree	Disagree	Neither agree nor disagree		No	Agree	Neither agree nor disagree	Agree	Agree	Agree	Agree	Agree	Neither agree nor disagree	Very unlikely	Neutral	Neutral	Interested	Interested	Not at all interested	Unlikely	Likely	Likely	Likely	Unlikely	Very Likely	No
Yes	Yes - myself			Exercise & physical activity	Weight management	Medication (prescription only)		Physiotherapy		Supplements (e.g., Chondroitin, Glucosamine)				Yes		NHS (doctor's advice)					Charities (e.g., Versus Arthritis, Arthritis Action)			Agree	Agree	Strongly Agree		Yes	Strongly Agree	Strongly Agree	Strongly Agree	Agree	Strongly Agree	Strongly Agree	Strongly Agree	Disagree	Unlikely	Neutral	Interested	Interested	Interested	Neutral	Likely	Very Likely	Neither likely nor unlikely	Likely	Unlikely	Neither likely nor unlikely	No
Yes		Yes- I know someone		Exercise & physical activity	Weight management	Medication (prescription only)		Physiotherapy	Nutrition as medicine (anti-inflammatory diet)	Supplements (e.g., Chondroitin, Glucosamine)				Yes	NHS (website)	NHS (doctor's advice)	BBC Food (website)	Magazines (e.g., Women's/ Men's Health, Good Housekeeping)	Blogs	A dietitian/ nutritionist	Charities (e.g., Versus Arthritis, Arthritis Action)			Strongly Agree	Strongly Agree	Strongly Agree		Yes	Strongly Agree	Strongly Agree	Neither agree nor disagree	Strongly Agree	Strongly Agree	Strongly Agree	Strongly Agree	Strongly Agree													No
Yes			No			Medication (prescription only)	Medication (over the counter)							No										Disagree	Disagree	Disagree		Yes	Agree	Agree	Agree	Agree	Agree	Agree	Agree	Neither agree nor disagree													No
Yes	Yes - myself	Yes- I know someone		Exercise & physical activity	Weight management	Medication (prescription only)	Medication (over the counter)		Nutrition as medicine (anti-inflammatory diet)	Supplements (e.g., Chondroitin, Glucosamine)		Surgery		Yes	NHS (website)						Charities (e.g., Versus Arthritis, Arthritis Action)	Other	general surfing on the net	Neither agree nor disagree	Agree	Neither agree nor disagree		Yes	Strongly Agree	Strongly Agree	Neither agree nor disagree	Neither agree nor disagree	Agree	Neither agree nor disagree	Disagree	Neither agree nor disagree	Unlikely	Neutral	Interested	Interested	Interested	Neutral	Neither likely nor unlikely	Very Likely	Neither likely nor unlikely	Unlikely	Very Unlikely	Likely	Yes, please explain
Yes		Yes- I know someone		Exercise & physical activity	Weight management		Medication (over the counter)			Supplements (e.g., Chondroitin, Glucosamine)		Surgery		No										Disagree	Disagree	Disagree		Yes	Agree	Agree	Neither agree nor disagree	Neither agree nor disagree	Neither agree nor disagree	Neither agree nor disagree	Agree	Agree													No
Yes	Yes - myself			Exercise & physical activity	Weight management	Medication (prescription only)	Medication (over the counter)	Physiotherapy		Supplements (e.g., Chondroitin, Glucosamine)		Surgery		No										Neither agree nor disagree	Neither agree nor disagree	Disagree		Yes	Agree	Agree	Neither agree nor disagree	Agree	Agree	Agree	Agree	Neither agree nor disagree	Unlikely	Slightly interested	Slightly interested	Neutral	Slightly interested	Not at all interested	Unlikely	Likely	Very Unlikely	Unlikely	Very Unlikely	Neither likely nor unlikely	No
Yes			No										None of the above	No										Neither agree nor disagree	Neither agree nor disagree	Agree		No	Neither agree nor disagree	Neither agree nor disagree	Neither agree nor disagree	Agree	Neither agree nor disagree	Agree	Neither agree nor disagree	Neither agree nor disagree													No
Yes		Yes- I know someone		Exercise & physical activity	Weight management	Medication (prescription only)		Physiotherapy		Supplements (e.g., Chondroitin, Glucosamine)		Surgery		Yes	NHS (website)			Magazines (e.g., Women's/ Men's Health, Good Housekeeping)		A dietitian/ nutritionist	Charities (e.g., Versus Arthritis, Arthritis Action)			Disagree	Agree	Neither agree nor disagree		Yes	Agree	Agree	Disagree	Neither agree nor disagree	Agree	Agree	Agree	Neither agree nor disagree													No
Yes			No										None of the above	No										Stongly Disagree	Stongly Disagree	Stongly Disagree		No	Strongly Agree	Strongly Agree	Strongly Agree	Strongly Agree	Strongly Agree	Strongly Agree	Strongly Agree	Strongly Agree													No
Yes			No	Exercise & physical activity	Weight management	Medication (prescription only)		Physiotherapy						No										Stongly Disagree	Stongly Disagree	Stongly Disagree		Yes	Agree	Agree	Agree	Agree	Agree	Agree	Agree	Agree													Yes, please explain
Yes		Yes- I know someone		Exercise & physical activity	Weight management	Medication (prescription only)			Nutrition as medicine (anti-inflammatory diet)					No										Strongly Agree	Strongly Agree	Agree		No	Agree	Strongly Agree	Strongly Agree	Strongly Agree	Strongly Agree	Strongly Agree	Strongly Agree	Strongly Agree													No
Yes		Yes- I know someone		Exercise & physical activity	Weight management	Medication (prescription only)								Yes		NHS (doctor's advice)			Blogs					Neither agree nor disagree	Neither agree nor disagree	Agree		Yes	Neither agree nor disagree	Neither agree nor disagree	Agree	Agree	Neither agree nor disagree	Strongly Agree	Strongly Agree	Neither agree nor disagree													No
Yes		Yes- I know someone		Exercise & physical activity	Weight management	Medication (prescription only)		Physiotherapy	Nutrition as medicine (anti-inflammatory diet)	Supplements (e.g., Chondroitin, Glucosamine)		Surgery		No										Agree	Agree	Agree		Yes	Strongly Agree	Agree	Strongly Agree	Neither agree nor disagree	Strongly Agree	Strongly Agree	Strongly Agree	Strongly Agree													No
Yes		Yes- I know someone		Exercise & physical activity		Medication (prescription only)		Physiotherapy						No										Disagree	Disagree	Stongly Disagree		Yes	Strongly Agree	Strongly Agree	Agree	Neither agree nor disagree	Neither agree nor disagree	Agree	Disagree	Neither agree nor disagree													No
Yes	Yes - myself			Exercise & physical activity	Weight management	Medication (prescription only)		Physiotherapy				Surgery		Yes	NHS (website)	NHS (doctor's advice)		Magazines (e.g., Women's/ Men's Health, Good Housekeeping)				Other		Agree	Agree	Agree		Yes	Strongly Agree	Agree	Strongly Agree	Agree	Agree	Strongly Agree	Strongly Agree	Strongly Agree	Likely	Interested	Interested	Interested	Interested	Interested	Neither likely nor unlikely	Unlikely	Very Unlikely	Likely	Unlikely	Neither likely nor unlikely	No
Yes	Yes - myself	Yes- I know someone		Exercise & physical activity	Weight management	Medication (prescription only)	Medication (over the counter)	Physiotherapy		Supplements (e.g., Chondroitin, Glucosamine)		Surgery		No										Disagree	Disagree	Disagree		No	Agree	Strongly Agree	Strongly Agree	Strongly Agree	Strongly Agree	Strongly Agree	Strongly Agree	Strongly Agree	Unlikely	Interested	Interested	Interested	Interested	Interested	Likely	Likely	Neither likely nor unlikely	Unlikely	Neither likely nor unlikely	Likely	Yes, please explain
Yes			No	Exercise & physical activity	Weight management	Medication (prescription only)			Nutrition as medicine (anti-inflammatory diet)			Surgery		Yes	NHS (website)	NHS (doctor's advice)								Neither agree nor disagree	Disagree	Disagree		Yes	Agree	Agree	Agree	Neither agree nor disagree	Neither agree nor disagree	Agree	Neither agree nor disagree	Neither agree nor disagree													No
Yes	Yes - myself			Exercise & physical activity	Weight management			Physiotherapy		Supplements (e.g., Chondroitin, Glucosamine)		Surgery		No										Disagree	Agree	Stongly Disagree		No	Neither agree nor disagree	Neither agree nor disagree	Disagree	Neither agree nor disagree	Strongly Agree	Strongly Agree	Neither agree nor disagree	Agree	Unlikely	Neutral	Slightly interested	Slightly interested	Interested	Slightly interested	Unlikely	Likely	Unlikely	Unlikely	Very Unlikely	Very Likely	No
Yes		Yes- I know someone		Exercise & physical activity	Weight management	Medication (prescription only)	Medication (over the counter)	Physiotherapy						No										Disagree	Disagree	Disagree		Yes	Agree	Strongly Agree	Agree	Strongly Agree	Strongly Agree	Agree	Agree	Neither agree nor disagree													Yes, please explain
Yes			No			Medication (prescription only)	Medication (over the counter)	Physiotherapy	Nutrition as medicine (anti-inflammatory diet)	Supplements (e.g., Chondroitin, Glucosamine)				No										Disagree	Disagree	Agree		Yes	Strongly Agree	Strongly Agree	Strongly Agree	Agree	Agree	Agree	Agree	Agree													No
Yes		Yes- I know someone		Exercise & physical activity	Weight management	Medication (prescription only)			Nutrition as medicine (anti-inflammatory diet)	Supplements (e.g., Chondroitin, Glucosamine)		Surgery		Yes	NHS (website)						Charities (e.g., Versus Arthritis, Arthritis Action)			Agree	Disagree	Agree		Yes	Strongly Agree	Agree	Agree	Agree	Agree	Neither agree nor disagree	Agree	Neither agree nor disagree													No
Yes	Yes - myself	Yes- I know someone		Exercise & physical activity	Weight management		Medication (over the counter)	Physiotherapy		Supplements (e.g., Chondroitin, Glucosamine)		Surgery		No										Stongly Disagree	Stongly Disagree	Stongly Disagree		Yes	Neither agree nor disagree	Strongly Agree	Neither agree nor disagree	Agree	Disagree	Agree	Agree	Neither agree nor disagree	Very unlikely	Interested	Slightly interested	Slightly interested	Interested	Interested	Likely	Likely	Neither likely nor unlikely	Unlikely	Very Unlikely	Very Likely	No
Yes	Yes - myself			Exercise & physical activity		Medication (prescription only)		Physiotherapy				Surgery		No										Disagree	Disagree	Disagree		Yes	Agree	Agree	Strongly Agree	Neither agree nor disagree	Agree	Strongly Agree	Strongly Agree	Strongly Agree	Unlikely	Interested	Interested	Neutral	Neutral	Interested	Neither likely nor unlikely	Very Likely	Neither likely nor unlikely	Likely	Neither likely nor unlikely	Very Likely	No
Yes		Yes- I know someone		Exercise & physical activity	Weight management	Medication (prescription only)		Physiotherapy	Nutrition as medicine (anti-inflammatory diet)					No										Neither agree nor disagree	Neither agree nor disagree	Disagree		Yes	Agree	Agree	Agree	Agree	Strongly Agree	Agree	Agree	Neither agree nor disagree													No
Yes	Yes - myself	Yes- I know someone		Exercise & physical activity	Weight management	Medication (prescription only)		Physiotherapy	Nutrition as medicine (anti-inflammatory diet)	Supplements (e.g., Chondroitin, Glucosamine)		Surgery		Yes	NHS (website)	NHS (doctor's advice)				A dietitian/ nutritionist	Charities (e.g., Versus Arthritis, Arthritis Action)			Agree	Strongly Agree	Agree		Yes	Agree	Strongly Agree	Strongly Agree	Strongly Agree	Neither agree nor disagree	Strongly Agree	Agree	Neither agree nor disagree	Likely	Interested	Very interested	Interested	Neutral	Not at all interested	Likely	Very Likely	Very Likely	Very Likely	Unlikely	Very Likely	No
Yes		Yes- I know someone		Exercise & physical activity		Medication (prescription only)						Surgery		No										Disagree	Disagree	Disagree		Yes	Agree	Neither agree nor disagree	Agree	Agree	Disagree	Agree	Agree	Disagree													Yes, please explain
Yes		Yes- I know someone		Exercise & physical activity	Weight management	Medication (prescription only)		Physiotherapy		Supplements (e.g., Chondroitin, Glucosamine)		Surgery		Yes	NHS (website)					A dietitian/ nutritionist				Agree	Disagree	Agree		Yes	Agree	Agree	Agree	Disagree	Strongly Agree	Strongly Agree	Strongly Agree	Disagree													No
Yes		Yes- I know someone		Exercise & physical activity	Weight management	Medication (prescription only)		Physiotherapy						No										Stongly Disagree	Stongly Disagree	Stongly Disagree		Yes	Strongly Agree	Strongly Agree	Agree	Neither agree nor disagree	Neither agree nor disagree	Strongly Agree	Neither agree nor disagree	Disagree													No
Yes		Yes- I know someone		Exercise & physical activity	Weight management	Medication (prescription only)	Medication (over the counter)	Physiotherapy	Nutrition as medicine (anti-inflammatory diet)	Supplements (e.g., Chondroitin, Glucosamine)				No										Disagree	Disagree	Disagree		Yes	Agree	Agree	Agree	Agree	Agree	Agree	Agree	Agree													Yes, please explain
Yes			No	Exercise & physical activity	Weight management	Medication (prescription only)	Medication (over the counter)		Nutrition as medicine (anti-inflammatory diet)	Supplements (e.g., Chondroitin, Glucosamine)		Surgery		No
Yes			No	Exercise & physical activity	Weight management			Physiotherapy	Nutrition as medicine (anti-inflammatory diet)	Supplements (e.g., Chondroitin, Glucosamine)				No										Neither agree nor disagree	Neither agree nor disagree	Disagree		Yes	Agree	Neither agree nor disagree	Neither agree nor disagree	Agree	Strongly Agree	Strongly Agree	Strongly Agree	Neither agree nor disagree
Yes			No	Exercise & physical activity	Weight management	Medication (prescription only)	Medication (over the counter)	Physiotherapy	Nutrition as medicine (anti-inflammatory diet)	Supplements (e.g., Chondroitin, Glucosamine)		Surgery		Yes	NHS (website)						Charities (e.g., Versus Arthritis, Arthritis Action)			Agree	Agree	Agree		Yes	Agree	Strongly Agree	Strongly Agree	Strongly Agree	Strongly Agree	Agree	Agree	Agree													No
Yes	Yes - myself	Yes- I know someone		Exercise & physical activity	Weight management	Medication (prescription only)					Herbs			No										Agree	Neither agree nor disagree	Agree		Yes	Neither agree nor disagree	Agree	Agree	Agree	Agree	Agree	Agree	Stongly Disagree	Very unlikely	Neutral	Neutral	Slightly interested	Slightly interested	Neutral	Likely	Likely	Likely	Unlikely	Likely	Likely	No
Yes	Yes - myself			Exercise & physical activity	Weight management	Medication (prescription only)	Medication (over the counter)		Nutrition as medicine (anti-inflammatory diet)	Supplements (e.g., Chondroitin, Glucosamine)		Surgery		Yes	NHS (website)	NHS (doctor's advice)					Charities (e.g., Versus Arthritis, Arthritis Action)			Strongly Agree	Strongly Agree	Neither agree nor disagree		Yes	Agree	Strongly Agree	Agree	Strongly Agree	Strongly Agree	Strongly Agree	Neither agree nor disagree	Agree	Likely	Interested	Very interested	Very interested	Very interested	Interested	Unlikely	Likely	Very Unlikely	Very Unlikely	Unlikely	Neither likely nor unlikely	No
Yes		Yes- I know someone		Exercise & physical activity	Weight management			Physiotherapy		Supplements (e.g., Chondroitin, Glucosamine)		Surgery		No
Yes	Yes - myself			Exercise & physical activity	Weight management	Medication (prescription only)		Physiotherapy		Supplements (e.g., Chondroitin, Glucosamine)				Yes	NHS (website)					A dietitian/ nutritionist				Disagree	Disagree	Neither agree nor disagree		Yes
Yes			No	Exercise & physical activity	Weight management	Medication (prescription only)			Nutrition as medicine (anti-inflammatory diet)	Supplements (e.g., Chondroitin, Glucosamine)				No										Neither agree nor disagree	Disagree	Neither agree nor disagree		Yes	Agree	Agree	Agree	Neither agree nor disagree	Agree	Agree	Agree	Agree													No
Yes			No	Exercise & physical activity	Weight management	Medication (prescription only)	Medication (over the counter)	Physiotherapy	Nutrition as medicine (anti-inflammatory diet)	Supplements (e.g., Chondroitin, Glucosamine)		Surgery		No										Agree	Agree	Agree		No	Agree	Agree	Agree	Agree	Agree	Agree	Agree	Agree													No
Yes		Yes- I know someone			Weight management	Medication (prescription only)	Medication (over the counter)	Physiotherapy						No										Disagree	Disagree	Disagree		Yes	Agree	Agree	Agree	Agree	Agree	Agree	Agree	Neither agree nor disagree													Yes, please explain
Yes		Yes- I know someone		Exercise & physical activity	Weight management	Medication (prescription only)	Medication (over the counter)	Physiotherapy	Nutrition as medicine (anti-inflammatory diet)	Supplements (e.g., Chondroitin, Glucosamine)				Yes	NHS (website)						Charities (e.g., Versus Arthritis, Arthritis Action)			Agree	Agree	Agree		Yes	Strongly Agree	Strongly Agree	Agree	Strongly Agree	Strongly Agree	Agree	Agree	Neither agree nor disagree													No
Yes	Yes - myself			Exercise & physical activity	Weight management	Medication (prescription only)	Medication (over the counter)		Nutrition as medicine (anti-inflammatory diet)	Supplements (e.g., Chondroitin, Glucosamine)	Herbs	Surgery		No										Stongly Disagree	Stongly Disagree	Disagree		Yes	Agree	Agree	Neither agree nor disagree	Neither agree nor disagree	Agree	Disagree	Strongly Agree	Stongly Disagree	Unlikely	Very interested	Very interested	Very interested	Neutral	Neutral	Likely	Very Likely	Very Likely	Unlikely	Very Unlikely	Very Likely	No
Yes			No	Exercise & physical activity	Weight management	Medication (prescription only)								No										Disagree	Disagree	Disagree		Yes	Agree	Agree	Agree	Agree	Neither agree nor disagree	Neither agree nor disagree	Neither agree nor disagree	Neither agree nor disagree													No
Yes			No			Medication (prescription only)		Physiotherapy	Nutrition as medicine (anti-inflammatory diet)			Surgery		No										Stongly Disagree	Stongly Disagree	Stongly Disagree		Yes	Agree	Strongly Agree	Agree	Disagree	Agree	Agree	Agree	Agree													No
Yes		Yes- I know someone		Exercise & physical activity		Medication (prescription only)		Physiotherapy						No										Stongly Disagree	Stongly Disagree	Neither agree nor disagree		No	Strongly Agree	Strongly Agree	Strongly Agree	Strongly Agree	Strongly Agree	Strongly Agree	Agree	Disagree													No
Yes		Yes- I know someone		Exercise & physical activity										No										Disagree	Disagree	Disagree		Yes	Agree	Agree	Agree	Neither agree nor disagree	Strongly Agree	Strongly Agree	Agree	Agree													Yes, please explain
Yes		Yes- I know someone		Exercise & physical activity	Weight management			Physiotherapy						No										Neither agree nor disagree	Disagree	Disagree		Yes	Agree	Agree	Agree	Agree	Agree	Agree	Agree	Agree													No
Yes		Yes- I know someone		Exercise & physical activity	Weight management	Medication (prescription only)		Physiotherapy		Supplements (e.g., Chondroitin, Glucosamine)		Surgery		No										Stongly Disagree	Stongly Disagree	Stongly Disagree		No	Stongly Disagree	Agree	Agree	Strongly Agree	Strongly Agree	Agree	Agree	Agree													No
Yes		Yes- I know someone		Exercise & physical activity	Weight management	Medication (prescription only)		Physiotherapy						No										Disagree	Disagree	Neither agree nor disagree		Yes	Strongly Agree	Strongly Agree	Strongly Agree	Neither agree nor disagree	Agree	Strongly Agree	Agree	Neither agree nor disagree													No
Yes		Yes- I know someone		Exercise & physical activity	Weight management	Medication (prescription only)		Physiotherapy		Supplements (e.g., Chondroitin, Glucosamine)		Surgery		No										Disagree	Disagree	Stongly Disagree		Yes	Strongly Agree	Strongly Agree	Agree	Agree	Agree	Strongly Agree	Strongly Agree	Disagree													No
Yes	Yes - myself			Exercise & physical activity	Weight management	Medication (prescription only)	Medication (over the counter)	Physiotherapy	Nutrition as medicine (anti-inflammatory diet)	Supplements (e.g., Chondroitin, Glucosamine)		Surgery		No										Disagree	Disagree	Disagree		Yes	Agree	Strongly Agree	Agree	Agree	Agree	Agree	Agree	Agree	Unlikely	Interested	Interested	Very interested	Very interested	Interested	Unlikely	Likely	Unlikely	Unlikely	Very Unlikely	Unlikely	No
Yes		Yes- I know someone		Exercise & physical activity	Weight management	Medication (prescription only)	Medication (over the counter)		Nutrition as medicine (anti-inflammatory diet)	Supplements (e.g., Chondroitin, Glucosamine)				No										Disagree	Disagree	Disagree		Yes	Agree	Strongly Agree	Strongly Agree	Agree	Agree	Neither agree nor disagree	Agree	Neither agree nor disagree													No
Yes			No		Weight management	Medication (prescription only)			Nutrition as medicine (anti-inflammatory diet)					No										Stongly Disagree	Stongly Disagree	Stongly Disagree		No	Neither agree nor disagree	Neither agree nor disagree	Disagree	Disagree	Disagree	Neither agree nor disagree	Neither agree nor disagree	Neither agree nor disagree													No
Yes			No	Exercise & physical activity	Weight management	Medication (prescription only)	Medication (over the counter)	Physiotherapy	Nutrition as medicine (anti-inflammatory diet)			Surgery		Yes	NHS (website)	NHS (doctor's advice)								Neither agree nor disagree	Disagree	Disagree		Yes	Agree	Disagree	Agree	Agree	Disagree	Neither agree nor disagree	Disagree	Neither agree nor disagree													No
Yes			No	Exercise & physical activity		Medication (prescription only)								No										Stongly Disagree	Stongly Disagree	Stongly Disagree		No	Agree	Strongly Agree	Agree	Agree	Agree	Strongly Agree	Neither agree nor disagree	Neither agree nor disagree													Yes, please explain
Yes	Yes - myself			Exercise & physical activity	Weight management	Medication (prescription only)		Physiotherapy				Surgery		No										Stongly Disagree	Stongly Disagree	Stongly Disagree		Yes	Strongly Agree	Strongly Agree	Agree	Stongly Disagree	Strongly Agree	Stongly Disagree	Strongly Agree	Neither agree nor disagree	Very unlikely	Very interested	Very interested	Very interested	Very interested	Very interested	Very Likely	Likely	Very Unlikely	Neither likely nor unlikely	Very Unlikely	Very Likely	No
Yes			No	Exercise & physical activity		Medication (prescription only)				Supplements (e.g., Chondroitin, Glucosamine)		Surgery		No										Agree	Agree	Disagree		Yes	Strongly Agree	Strongly Agree	Agree	Strongly Agree	Strongly Agree	Strongly Agree	Strongly Agree	Stongly Disagree													No
Yes		Yes- I know someone		Exercise & physical activity	Weight management	Medication (prescription only)		Physiotherapy				Surgery		No										Stongly Disagree	Stongly Disagree	Disagree		Yes	Strongly Agree	Strongly Agree	Strongly Agree	Strongly Agree	Strongly Agree	Strongly Agree	Strongly Agree	Strongly Agree													No
Yes		Yes- I know someone		Exercise & physical activity		Medication (prescription only)		Physiotherapy				Surgery		No										Disagree	Disagree	Disagree		Yes	Agree	Agree	Neither agree nor disagree	Neither agree nor disagree	Agree	Agree	Agree	Disagree													No
Yes		Yes- I know someone		Exercise & physical activity	Weight management	Medication (prescription only)	Medication (over the counter)	Physiotherapy	Nutrition as medicine (anti-inflammatory diet)	Supplements (e.g., Chondroitin, Glucosamine)	Herbs	Surgery		No										Agree	Agree	Disagree		Yes	Strongly Agree	Strongly Agree	Strongly Agree	Agree	Agree	Agree	Agree	Agree													Yes, please explain
Yes		Yes- I know someone		Exercise & physical activity	Weight management	Medication (prescription only)			Nutrition as medicine (anti-inflammatory diet)					No										Agree	Neither agree nor disagree	Neither agree nor disagree		Yes	Agree	Agree	Disagree	Neither agree nor disagree	Agree	Agree	Agree	Neither agree nor disagree													No
Yes			No	Exercise & physical activity				Physiotherapy						Yes	NHS (website)			Magazines (e.g., Women's/ Men's Health, Good Housekeeping)						Agree	Neither agree nor disagree	Agree		Yes	Agree	Agree	Disagree	Neither agree nor disagree	Agree	Agree	Agree	Neither agree nor disagree													No
Yes			No			Medication (prescription only)								No										Stongly Disagree	Stongly Disagree	Stongly Disagree		Yes	Agree	Agree	Agree	Agree	Agree	Agree	Agree	Agree													No
Yes			No										None of the above	No										Stongly Disagree	Stongly Disagree	Disagree		No	Strongly Agree	Strongly Agree	Disagree	Agree	Strongly Agree	Strongly Agree	Strongly Agree	Neither agree nor disagree													Yes, please explain
Yes			No	Exercise & physical activity		Medication (prescription only)		Physiotherapy						No										Agree	Stongly Disagree	Agree		Yes	Strongly Agree	Agree	Strongly Agree	Strongly Agree	Strongly Agree	Strongly Agree	Strongly Agree	Neither agree nor disagree													No
Yes	Yes - myself				Weight management	Medication (prescription only)	Medication (over the counter)	Physiotherapy						No										Stongly Disagree	Stongly Disagree	Stongly Disagree		Yes	Agree	Agree	Agree	Agree	Agree	Agree	Agree	Strongly Agree	Unlikely	Very interested	Interested	Neutral	Interested	Neutral	Likely	Very Likely	Likely	Very Likely	Neither likely nor unlikely	Very Likely	No
Yes			No		Weight management	Medication (prescription only)		Physiotherapy		Supplements (e.g., Chondroitin, Glucosamine)				No										Disagree	Stongly Disagree	Disagree		Yes	Strongly Agree	Strongly Agree	Strongly Agree	Strongly Agree	Strongly Agree	Strongly Agree	Strongly Agree	Neither agree nor disagree													No
Yes	Yes - myself			Exercise & physical activity	Weight management					Supplements (e.g., Chondroitin, Glucosamine)		Surgery		No										Disagree	Disagree	Neither agree nor disagree		Yes	Agree	Agree	Agree	Agree	Agree	Neither agree nor disagree	Strongly Agree	Neither agree nor disagree	Unlikely	Interested	Slightly interested	Slightly interested	Interested	Not at all interested	Unlikely	Likely	Neither likely nor unlikely	Neither likely nor unlikely	Very Unlikely	Likely	No
Yes		Yes- I know someone		Exercise & physical activity	Weight management	Medication (prescription only)	Medication (over the counter)							No										Neither agree nor disagree	Neither agree nor disagree	Neither agree nor disagree		No	Agree	Agree	Agree	Agree	Agree	Agree	Agree	Neither agree nor disagree													No
Yes	Yes - myself			Exercise & physical activity	Weight management	Medication (prescription only)								Yes	NHS (website)	NHS (doctor's advice)					Charities (e.g., Versus Arthritis, Arthritis Action)			Strongly Agree	Stongly Disagree	Strongly Agree		Yes	Strongly Agree	Strongly Agree	Strongly Agree	Strongly Agree	Strongly Agree	Strongly Agree	Strongly Agree	Strongly Agree	Neutral	Slightly interested	Slightly interested	Slightly interested	Slightly interested	Slightly interested	Likely	Neither likely nor unlikely	Very Unlikely	Neither likely nor unlikely	Neither likely nor unlikely	Very Likely	Yes, please explain
Yes		Yes- I know someone		Exercise & physical activity	Weight management	Medication (prescription only)	Medication (over the counter)	Physiotherapy	Nutrition as medicine (anti-inflammatory diet)	Supplements (e.g., Chondroitin, Glucosamine)		Surgery		No										Neither agree nor disagree	Disagree	Disagree		Yes	Agree	Agree	Agree	Agree	Agree	Agree	Agree	Agree													No
Yes			No	Exercise & physical activity	Weight management							Surgery		No										Stongly Disagree	Stongly Disagree	Stongly Disagree		No	Agree	Strongly Agree	Neither agree nor disagree	Agree	Agree	Neither agree nor disagree	Agree	Agree													Yes, please explain
Yes	Yes - myself			Exercise & physical activity	Weight management	Medication (prescription only)	Medication (over the counter)	Physiotherapy		Supplements (e.g., Chondroitin, Glucosamine)		Surgery		Yes		NHS (doctor's advice)						Other	Google	Disagree	Disagree	Disagree		Yes	Strongly Agree	Strongly Agree	Strongly Agree	Strongly Agree	Strongly Agree	Strongly Agree	Strongly Agree	Strongly Agree	Likely	Very interested	Very interested	Very interested	Interested	Neutral	Likely	Very Likely	Neither likely nor unlikely	Unlikely	Very Unlikely	Likely	No
Yes			No	Exercise & physical activity		Medication (prescription only)	Medication (over the counter)		Nutrition as medicine (anti-inflammatory diet)	Supplements (e.g., Chondroitin, Glucosamine)				Yes	NHS (website)	NHS (doctor's advice)						Other	holistic	Agree	Agree	Agree		Yes	Agree	Agree	Neither agree nor disagree	Agree	Strongly Agree	Neither agree nor disagree	Neither agree nor disagree	Disagree													Yes, please explain
Yes		Yes- I know someone		Exercise & physical activity	Weight management	Medication (prescription only)		Physiotherapy						No										Neither agree nor disagree	Neither agree nor disagree	Disagree		Yes	Strongly Agree	Strongly Agree	Agree	Agree	Strongly Agree	Agree	Neither agree nor disagree	Neither agree nor disagree													Yes, please explain
Yes	Yes - myself	Yes- I know someone		Exercise & physical activity	Weight management		Medication (over the counter)			Supplements (e.g., Chondroitin, Glucosamine)		Surgery		No										Disagree	Disagree	Disagree		Yes	Agree	Agree	Strongly Agree	Agree	Agree	Agree	Agree	Strongly Agree	Unlikely	Slightly interested	Neutral	Slightly interested	Neutral	Neutral	Likely	Very Likely	Likely	Likely	Very Unlikely	Likely	No
Yes		Yes- I know someone		Exercise & physical activity	Weight management	Medication (prescription only)		Physiotherapy	Nutrition as medicine (anti-inflammatory diet)	Supplements (e.g., Chondroitin, Glucosamine)	Herbs	Surgery		No										Agree	Neither agree nor disagree	Strongly Agree		Yes	Agree	Agree	Agree	Neither agree nor disagree	Agree	Agree	Agree	Strongly Agree													Yes, please explain
Yes			No			Medication (prescription only)	Medication (over the counter)							No										Stongly Disagree	Stongly Disagree	Stongly Disagree		No	Agree	Agree	Agree	Agree	Agree	Agree	Neither agree nor disagree	Neither agree nor disagree													No
Yes	Yes - myself			Exercise & physical activity	Weight management	Medication (prescription only)	Medication (over the counter)	Physiotherapy	Nutrition as medicine (anti-inflammatory diet)			Surgery		No										Agree	Agree	Disagree		Yes	Agree	Strongly Agree	Agree	Strongly Agree	Strongly Agree	Agree	Strongly Agree	Strongly Agree	Unlikely	Not at all interested	Not at all interested	Slightly interested	Interested	Not at all interested	Unlikely	Likely	Unlikely	Unlikely	Unlikely	Unlikely	No
Yes		Yes- I know someone		Exercise & physical activity		Medication (prescription only)						Surgery		Yes	NHS (website)									Stongly Disagree	Stongly Disagree	Disagree		Yes	Agree	Agree	Agree	Agree	Agree	Agree	Agree	Neither agree nor disagree													No
Yes		Yes- I know someone		Exercise & physical activity	Weight management	Medication (prescription only)								No										Disagree	Disagree	Stongly Disagree		Yes	Agree	Agree	Agree	Strongly Agree	Strongly Agree	Neither agree nor disagree	Agree	Neither agree nor disagree													No
Yes	Yes - myself	Yes- I know someone		Exercise & physical activity	Weight management	Medication (prescription only)	Medication (over the counter)	Physiotherapy	Nutrition as medicine (anti-inflammatory diet)	Supplements (e.g., Chondroitin, Glucosamine)	Herbs	Surgery		Yes	NHS (website)	NHS (doctor's advice)	BBC Food (website)		Blogs	A dietitian/ nutritionist				Agree	Agree	Agree		Yes	Strongly Agree	Strongly Agree	Neither agree nor disagree	Strongly Agree	Strongly Agree	Strongly Agree	Strongly Agree	Strongly Agree	Very likely	Very interested	Neutral	Neutral	Very interested	Neutral	Likely	Very Likely	Very Unlikely	Likely	Likely	Very Likely	No
Yes	Yes - myself			Exercise & physical activity	Weight management	Medication (prescription only)		Physiotherapy	Nutrition as medicine (anti-inflammatory diet)	Supplements (e.g., Chondroitin, Glucosamine)		Surgery		Yes	NHS (website)	NHS (doctor's advice)	BBC Food (website)			A dietitian/ nutritionist				Strongly Agree	Agree	Strongly Agree		Yes	Agree	Agree	Disagree	Disagree	Strongly Agree	Strongly Agree	Agree	Agree	Very likely	Slightly interested	Very interested	Neutral	Slightly interested	Interested	Very Likely	Very Likely	Unlikely	Unlikely	Likely	Very Likely	Yes, please explain
Yes		Yes- I know someone		Exercise & physical activity	Weight management			Physiotherapy		Supplements (e.g., Chondroitin, Glucosamine)				No										Disagree	Disagree	Disagree		Yes	Agree	Agree	Disagree	Disagree	Agree	Agree	Neither agree nor disagree	Neither agree nor disagree													No
Yes		Yes- I know someone				Medication (prescription only)			Nutrition as medicine (anti-inflammatory diet)					No										Disagree	Disagree	Disagree		No	Agree	Agree	Agree	Agree	Agree	Agree	Agree	Agree													No
Yes		Yes- I know someone		Exercise & physical activity	Weight management	Medication (prescription only)	Medication (over the counter)	Physiotherapy	Nutrition as medicine (anti-inflammatory diet)			Surgery		No										Neither agree nor disagree	Neither agree nor disagree	Disagree		Yes	Agree	Agree	Agree	Agree	Agree	Agree	Agree	Neither agree nor disagree													Yes, please explain
Yes		Yes- I know someone			Weight management			Physiotherapy						No										Disagree	Disagree	Stongly Disagree		Yes	Agree	Neither agree nor disagree	Agree	Agree	Agree	Agree	Agree	Agree													No
Yes		Yes- I know someone		Exercise & physical activity	Weight management	Medication (prescription only)		Physiotherapy				Surgery		Yes	NHS (website)	NHS (doctor's advice)								Disagree	Disagree	Disagree		No	Agree	Agree	Agree	Agree	Agree	Agree	Agree	Agree													No
Yes		Yes- I know someone		Exercise & physical activity	Weight management	Medication (prescription only)		Physiotherapy		Supplements (e.g., Chondroitin, Glucosamine)				Yes	NHS (website)									Disagree	Disagree	Disagree		Yes	Strongly Agree	Strongly Agree	Strongly Agree	Neither agree nor disagree	Strongly Agree	Agree	Agree	Agree													No
Yes	Yes - myself			Exercise & physical activity	Weight management	Medication (prescription only)		Physiotherapy						No										Neither agree nor disagree	Disagree	Disagree		Yes	Neither agree nor disagree	Agree	Neither agree nor disagree	Agree	Agree	Agree	Agree	Stongly Disagree	Very unlikely	Interested	Neutral	Interested	Interested	Neutral	Very Likely	Likely	Very Likely	Very Likely	Likely	Very Likely	Yes, please explain
Yes		Yes- I know someone		Exercise & physical activity	Weight management	Medication (prescription only)	Medication (over the counter)	Physiotherapy	Nutrition as medicine (anti-inflammatory diet)	Supplements (e.g., Chondroitin, Glucosamine)	Herbs	Surgery		Yes	NHS (website)							Other	Books and other medical and natural health websites	Agree	Agree	Agree		Yes	Strongly Agree	Strongly Agree	Neither agree nor disagree	Agree	Strongly Agree	Strongly Agree	Agree	Neither agree nor disagree													No
Yes			No	Exercise & physical activity	Weight management	Medication (prescription only)	Medication (over the counter)	Physiotherapy	Nutrition as medicine (anti-inflammatory diet)	Supplements (e.g., Chondroitin, Glucosamine)		Surgery		No										Disagree	Disagree	Disagree		No	Strongly Agree	Neither agree nor disagree	Strongly Agree	Strongly Agree	Strongly Agree	Strongly Agree	Strongly Agree	Neither agree nor disagree													Yes, please explain
Yes		Yes- I know someone		Exercise & physical activity	Weight management	Medication (prescription only)	Medication (over the counter)	Physiotherapy						Yes	NHS (website)	NHS (doctor's advice)						Other	Google search and websites suggested	Neither agree nor disagree	Agree	Disagree		Yes	Strongly Agree	Strongly Agree	Strongly Agree	Strongly Agree	Neither agree nor disagree	Agree	Agree	Neither agree nor disagree													No
Yes	Yes - myself			Exercise & physical activity	Weight management	Medication (prescription only)	Medication (over the counter)	Physiotherapy	Nutrition as medicine (anti-inflammatory diet)					Yes	NHS (website)	NHS (doctor's advice)			Blogs		Charities (e.g., Versus Arthritis, Arthritis Action)			Disagree	Disagree	Neither agree nor disagree		Yes	Strongly Agree	Strongly Agree	Agree	Agree	Strongly Agree	Strongly Agree	Strongly Agree	Strongly Agree	Very unlikely	Very interested	Neutral	Interested	Very interested	Neutral	Likely	Very Likely	Unlikely	Neither likely nor unlikely	Very Unlikely	Very Likely	No
Yes	Yes - myself	Yes- I know someone		Exercise & physical activity	Weight management	Medication (prescription only)	Medication (over the counter)	Physiotherapy	Nutrition as medicine (anti-inflammatory diet)			Surgery		No										Neither agree nor disagree	Neither agree nor disagree	Disagree		No	Neither agree nor disagree	Disagree	Stongly Disagree	Stongly Disagree	Neither agree nor disagree	Stongly Disagree	Agree	Neither agree nor disagree	Very unlikely	Not at all interested	Not at all interested	Not at all interested	Not at all interested	Not at all interested	Unlikely	Likely	Unlikely	Likely	Very Unlikely	Very Unlikely	Yes, please explain
Yes		Yes- I know someone		Exercise & physical activity	Weight management		Medication (over the counter)	Physiotherapy	Nutrition as medicine (anti-inflammatory diet)	Supplements (e.g., Chondroitin, Glucosamine)		Surgery		No										Neither agree nor disagree	Disagree	Disagree		Yes	Agree	Agree	Agree	Agree	Strongly Agree	Agree	Agree	Agree													No
Yes	Yes - myself			Exercise & physical activity		Medication (prescription only)		Physiotherapy		Supplements (e.g., Chondroitin, Glucosamine)				No										Neither agree nor disagree	Neither agree nor disagree	Disagree		Yes	Agree	Agree	Agree	Agree	Agree	Agree	Agree	Agree	Neutral	Interested	Interested	Interested	Neutral	Neutral	Neither likely nor unlikely	Likely	Neither likely nor unlikely	Neither likely nor unlikely	Neither likely nor unlikely	Likely	No
Yes			No										None of the above	No										Neither agree nor disagree	Neither agree nor disagree	Agree		No	Disagree	Disagree	Neither agree nor disagree	Agree	Agree	Disagree	Neither agree nor disagree	Disagree													No
Yes			No	Exercise & physical activity	Weight management			Physiotherapy						No										Neither agree nor disagree	Agree	Disagree		Yes	Agree	Agree	Agree	Agree	Agree	Agree	Agree	Agree													No
Yes	Yes - myself			Exercise & physical activity	Weight management	Medication (prescription only)		Physiotherapy						No										Stongly Disagree	Stongly Disagree	Stongly Disagree		Yes	Strongly Agree	Strongly Agree	Neither agree nor disagree	Stongly Disagree	Stongly Disagree	Strongly Agree	Stongly Disagree	Neither agree nor disagree	Very unlikely	Slightly interested	Slightly interested	Slightly interested	Slightly interested	Not at all interested	Very Unlikely	Very Likely	Very Unlikely	Neither likely nor unlikely	Very Unlikely	Very Unlikely	No
Yes	Yes - myself	Yes- I know someone		Exercise & physical activity	Weight management	Medication (prescription only)	Medication (over the counter)	Physiotherapy	Nutrition as medicine (anti-inflammatory diet)	Supplements (e.g., Chondroitin, Glucosamine)		Surgery		No										Disagree	Disagree	Disagree		Yes	Agree	Agree	Neither agree nor disagree	Neither agree nor disagree	Neither agree nor disagree	Agree	Agree	Agree	Likely	Neutral	Not at all interested	Neutral	Not at all interested	Not at all interested	Likely	Neither likely nor unlikely	Neither likely nor unlikely	Likely	Unlikely	Neither likely nor unlikely	No
Yes		Yes- I know someone		Exercise & physical activity	Weight management	Medication (prescription only)		Physiotherapy	Nutrition as medicine (anti-inflammatory diet)					No										Agree	Neither agree nor disagree	Disagree		No	Agree	Agree	Agree	Agree	Agree	Agree	Agree	Agree													No
Yes		Yes- I know someone		Exercise & physical activity	Weight management	Medication (prescription only)	Medication (over the counter)	Physiotherapy	Nutrition as medicine (anti-inflammatory diet)	Supplements (e.g., Chondroitin, Glucosamine)				Yes	NHS (website)			Magazines (e.g., Women's/ Men's Health, Good Housekeeping)						Neither agree nor disagree	Neither agree nor disagree	Disagree		Yes	Strongly Agree	Strongly Agree	Strongly Agree	Strongly Agree	Strongly Agree	Strongly Agree	Strongly Agree	Neither agree nor disagree													No
Yes	Yes - myself				Weight management	Medication (prescription only)	Medication (over the counter)		Nutrition as medicine (anti-inflammatory diet)	Supplements (e.g., Chondroitin, Glucosamine)				Yes	NHS (website)						Charities (e.g., Versus Arthritis, Arthritis Action)			Agree	Disagree	Neither agree nor disagree		Yes	Agree	Agree	Agree	Agree	Agree	Neither agree nor disagree	Agree	Disagree	Unlikely	Very interested	Interested	Interested	Interested	Interested	Likely	Likely	Likely	Neither likely nor unlikely	Unlikely	Likely	No
Yes		Yes- I know someone		Exercise & physical activity		Medication (prescription only)		Physiotherapy	Nutrition as medicine (anti-inflammatory diet)	Supplements (e.g., Chondroitin, Glucosamine)				Yes	NHS (website)	NHS (doctor's advice)				A dietitian/ nutritionist				Agree	Agree	Agree		Yes	Agree	Agree	Agree	Neither agree nor disagree	Agree	Agree	Neither agree nor disagree	Neither agree nor disagree													No
Yes	Yes - myself	Yes- I know someone		Exercise & physical activity	Weight management				Nutrition as medicine (anti-inflammatory diet)	Supplements (e.g., Chondroitin, Glucosamine)				Yes	NHS (website)				Blogs	A dietitian/ nutritionist				Agree	Agree	Agree		Yes	Agree	Agree	Neither agree nor disagree	Agree	Agree	Agree	Disagree	Neither agree nor disagree	Very likely	Interested	Interested	Interested	Interested	Interested	Very Unlikely	Likely	Very Unlikely	Unlikely	Unlikely	Very Unlikely	No
Yes			No			Medication (prescription only)								No										Disagree	Disagree	Disagree		Yes	Agree	Agree	Agree	Agree	Agree	Agree	Agree	Agree													No
Yes		Yes- I know someone		Exercise & physical activity	Weight management			Physiotherapy						No										Disagree	Disagree	Neither agree nor disagree		No	Agree	Neither agree nor disagree	Agree	Disagree	Neither agree nor disagree	Agree	Neither agree nor disagree	Stongly Disagree													No
Yes	Yes - myself			Exercise & physical activity		Medication (prescription only)		Physiotherapy				Surgery		No										Agree	Strongly Agree	Neither agree nor disagree		No	Agree	Strongly Agree	Disagree	Disagree	Agree	Strongly Agree	Neither agree nor disagree	Strongly Agree	Very likely	Neutral	Interested	Neutral	Very interested	Neutral	Unlikely	Neither likely nor unlikely	Likely	Unlikely	Unlikely	Very Likely	No
Yes			No	Exercise & physical activity	Weight management				Nutrition as medicine (anti-inflammatory diet)					No										Disagree	Disagree	Disagree		Yes	Agree	Agree	Disagree	Disagree	Agree	Agree	Disagree	Disagree													No
Yes			No	Exercise & physical activity	Weight management	Medication (prescription only)			Nutrition as medicine (anti-inflammatory diet)					No										Neither agree nor disagree	Disagree	Neither agree nor disagree		Yes	Agree	Strongly Agree	Agree	Strongly Agree	Strongly Agree	Neither agree nor disagree	Agree	Agree													No
Yes		Yes- I know someone											None of the above	No										Stongly Disagree	Stongly Disagree	Stongly Disagree		No	Neither agree nor disagree	Neither agree nor disagree	Agree	Agree	Agree	Agree	Agree	Agree													No
Yes		Yes- I know someone		Exercise & physical activity		Medication (prescription only)	Medication (over the counter)			Supplements (e.g., Chondroitin, Glucosamine)				No										Neither agree nor disagree	Disagree	Stongly Disagree		Yes	Agree	Agree	Agree	Strongly Agree	Agree	Agree	Agree	Neither agree nor disagree													Yes, please explain
Yes	Yes - myself			Exercise & physical activity	Weight management	Medication (prescription only)		Physiotherapy	Nutrition as medicine (anti-inflammatory diet)	Supplements (e.g., Chondroitin, Glucosamine)		Surgery		Yes	NHS (website)	NHS (doctor's advice)			Blogs	A dietitian/ nutritionist				Agree	Agree	Strongly Agree		Yes	Strongly Agree	Strongly Agree	Strongly Agree	Strongly Agree	Agree	Agree	Strongly Agree	Neither agree nor disagree	Likely	Slightly interested	Interested	Neutral	Very interested	Neutral	Likely	Very Likely	Likely	Likely	Very Unlikely	Likely	No
Yes			No			Medication (prescription only)				Supplements (e.g., Chondroitin, Glucosamine)				No										Disagree	Disagree	Stongly Disagree		No	Agree	Agree	Agree	Agree	Strongly Agree	Agree	Agree	Agree													No
Yes		Yes- I know someone		Exercise & physical activity			Medication (over the counter)							No										Strongly Agree	Strongly Agree	Strongly Agree		Yes	Strongly Agree	Strongly Agree	Disagree	Disagree	Strongly Agree	Strongly Agree	Neither agree nor disagree	Neither agree nor disagree													No
Yes	Yes - myself			Exercise & physical activity	Weight management			Physiotherapy	Nutrition as medicine (anti-inflammatory diet)	Supplements (e.g., Chondroitin, Glucosamine)		Surgery		No										Disagree	Disagree	Disagree		Yes	Strongly Agree	Strongly Agree	Strongly Agree	Disagree	Strongly Agree	Strongly Agree	Neither agree nor disagree	Neither agree nor disagree	Unlikely	Very interested	Very interested	Very interested	Very interested	Very interested	Neither likely nor unlikely	Very Likely	Unlikely	Likely	Very Unlikely	Likely	Yes, please explain
Yes			No	Exercise & physical activity	Weight management	Medication (prescription only)	Medication (over the counter)	Physiotherapy	Nutrition as medicine (anti-inflammatory diet)	Supplements (e.g., Chondroitin, Glucosamine)	Herbs		None of the above	No										Disagree	Disagree	Stongly Disagree		No	Neither agree nor disagree	Agree	Strongly Agree	Strongly Agree	Disagree	Neither agree nor disagree	Agree	Agree													No
Yes		Yes- I know someone		Exercise & physical activity	Weight management	Medication (prescription only)	Medication (over the counter)	Physiotherapy	Nutrition as medicine (anti-inflammatory diet)	Supplements (e.g., Chondroitin, Glucosamine)				Yes	NHS (website)	NHS (doctor's advice)					Charities (e.g., Versus Arthritis, Arthritis Action)			Agree	Agree	Agree		Yes	Strongly Agree	Strongly Agree	Agree	Strongly Agree	Strongly Agree	Strongly Agree	Strongly Agree	Agree													No
Yes		Yes- I know someone		Exercise & physical activity	Weight management	Medication (prescription only)		Physiotherapy						No										Disagree	Disagree	Disagree		Yes	Neither agree nor disagree	Neither agree nor disagree	Neither agree nor disagree	Neither agree nor disagree	Disagree	Neither agree nor disagree	Disagree	Neither agree nor disagree													No
Yes	Yes - myself			Exercise & physical activity	Weight management	Medication (prescription only)	Medication (over the counter)	Physiotherapy						Yes	NHS (website)	NHS (doctor's advice)		Magazines (e.g., Women's/ Men's Health, Good Housekeeping)		A dietitian/ nutritionist				Agree	Neither agree nor disagree	Neither agree nor disagree		Yes	Agree	Agree	Agree	Strongly Agree	Agree	Agree	Agree	Neither agree nor disagree	Neutral	Interested	Neutral	Interested	Neutral	Neutral	Likely	Very Likely	Neither likely nor unlikely	Unlikely	Very Unlikely	Neither likely nor unlikely	Yes, please explain
Yes		Yes- I know someone											None of the above	No										Disagree	Disagree	Disagree		Yes	Agree	Strongly Agree	Agree	Neither agree nor disagree	Agree	Agree	Neither agree nor disagree	Neither agree nor disagree													No
Yes	Yes - myself					Medication (prescription only)								No										Stongly Disagree	Stongly Disagree	Stongly Disagree		Yes	Strongly Agree	Strongly Agree	Strongly Agree	Strongly Agree	Strongly Agree	Strongly Agree	Strongly Agree	Disagree	Very unlikely	Very interested	Not at all interested	Not at all interested	Not at all interested	Not at all interested	Very Unlikely	Very Likely	Very Unlikely	Very Likely	Very Unlikely	Very Likely	No
Yes	Yes - myself	Yes- I know someone		Exercise & physical activity	Weight management	Medication (prescription only)	Medication (over the counter)	Physiotherapy	Nutrition as medicine (anti-inflammatory diet)	Supplements (e.g., Chondroitin, Glucosamine)		Surgery		Yes	NHS (website)						Charities (e.g., Versus Arthritis, Arthritis Action)			Agree	Agree	Agree		Yes	Agree	Agree	Agree	Agree	Agree	Agree	Agree	Neither agree nor disagree	Likely	Not at all interested	Not at all interested	Not at all interested	Not at all interested	Not at all interested	Likely	Likely	Neither likely nor unlikely	Neither likely nor unlikely	Neither likely nor unlikely	Likely	No
Yes		Yes- I know someone		Exercise & physical activity	Weight management	Medication (prescription only)			Nutrition as medicine (anti-inflammatory diet)	Supplements (e.g., Chondroitin, Glucosamine)	Herbs	Surgery		No										Agree	Agree	Agree		Yes	Strongly Agree	Strongly Agree	Neither agree nor disagree	Agree	Agree	Strongly Agree	Strongly Agree	Disagree													No
Yes	Yes - myself			Exercise & physical activity	Weight management	Medication (prescription only)	Medication (over the counter)	Physiotherapy	Nutrition as medicine (anti-inflammatory diet)	Supplements (e.g., Chondroitin, Glucosamine)		Surgery		Yes							Charities (e.g., Versus Arthritis, Arthritis Action)			Disagree	Disagree	Disagree		Yes	Agree	Agree	Agree	Neither agree nor disagree	Agree	Agree	Agree	Agree	Unlikely	Interested	Interested	Interested	Interested	Neutral	Likely	Very Likely	Unlikely	Very Likely	Likely	Very Likely	No
Yes		Yes- I know someone		Exercise & physical activity	Weight management			Physiotherapy						No										Disagree	Disagree	Disagree		Yes	Agree	Neither agree nor disagree	Agree	Disagree	Neither agree nor disagree	Strongly Agree	Disagree	Disagree													No
Yes	Yes - myself			Exercise & physical activity		Medication (prescription only)				Supplements (e.g., Chondroitin, Glucosamine)				Yes		NHS (doctor's advice)								Neither agree nor disagree	Neither agree nor disagree	Neither agree nor disagree		Yes	Agree	Agree	Strongly Agree	Agree	Strongly Agree	Agree	Agree	Neither agree nor disagree	Likely	Neutral	Neutral	Neutral	Neutral	Slightly interested	Neither likely nor unlikely	Likely	Very Likely	Likely	Very Unlikely	Likely	No
Yes		Yes- I know someone		Exercise & physical activity	Weight management	Medication (prescription only)	Medication (over the counter)	Physiotherapy	Nutrition as medicine (anti-inflammatory diet)	Supplements (e.g., Chondroitin, Glucosamine)		Surgery		Yes	NHS (website)				Blogs		Charities (e.g., Versus Arthritis, Arthritis Action)			Agree	Agree	Agree		Yes	Agree	Agree	Agree	Agree	Agree	Agree	Agree	Agree													No
Yes			No	Exercise & physical activity		Medication (prescription only)		Physiotherapy	Nutrition as medicine (anti-inflammatory diet)					No										Disagree	Stongly Disagree	Stongly Disagree		Yes	Agree	Strongly Agree	Neither agree nor disagree	Strongly Agree	Strongly Agree	Strongly Agree	Strongly Agree	Neither agree nor disagree													No
Yes	Yes - myself			Exercise & physical activity	Weight management	Medication (prescription only)	Medication (over the counter)			Supplements (e.g., Chondroitin, Glucosamine)		Surgery		No										Agree	Agree	Neither agree nor disagree		Yes	Agree	Strongly Agree	Neither agree nor disagree	Neither agree nor disagree	Agree	Agree	Neither agree nor disagree	Agree	Unlikely	Neutral	Neutral	Interested	Interested	Not at all interested	Likely	Likely	Very Unlikely	Unlikely	Very Unlikely	Likely	No
Yes		Yes- I know someone		Exercise & physical activity	Weight management	Medication (prescription only)	Medication (over the counter)	Physiotherapy	Nutrition as medicine (anti-inflammatory diet)		Herbs	Surgery		No										Agree	Agree	Agree		Yes	Neither agree nor disagree	Agree	Neither agree nor disagree	Agree	Disagree	Disagree	Disagree	Agree													No
Yes		Yes- I know someone		Exercise & physical activity	Weight management	Medication (prescription only)	Medication (over the counter)		Nutrition as medicine (anti-inflammatory diet)	Supplements (e.g., Chondroitin, Glucosamine)		Surgery		Yes	NHS (website)		BBC Food (website)							Agree	Agree	Strongly Agree		Yes	Agree	Agree	Agree	Agree	Agree	Agree	Agree	Agree													No
Yes	Yes - myself			Exercise & physical activity	Weight management	Medication (prescription only)		Physiotherapy		Supplements (e.g., Chondroitin, Glucosamine)				Yes	NHS (website)	NHS (doctor's advice)				A dietitian/ nutritionist				Agree	Neither agree nor disagree	Neither agree nor disagree		Yes	Agree	Agree	Neither agree nor disagree	Disagree	Agree	Agree	Agree	Neither agree nor disagree	Likely	Interested	Interested	Interested	Neutral	Neutral	Unlikely	Neither likely nor unlikely	Unlikely	Unlikely	Neither likely nor unlikely	Neither likely nor unlikely	No
Yes		Yes- I know someone		Exercise & physical activity			Medication (over the counter)	Physiotherapy	Nutrition as medicine (anti-inflammatory diet)					No										Disagree	Neither agree nor disagree	Stongly Disagree		Yes	Strongly Agree	Strongly Agree	Neither agree nor disagree	Agree	Agree	Agree	Disagree	Disagree													No
Yes		Yes- I know someone		Exercise & physical activity	Weight management	Medication (prescription only)	Medication (over the counter)	Physiotherapy		Supplements (e.g., Chondroitin, Glucosamine)				No										Disagree	Disagree	Disagree		Yes	Agree	Agree	Agree	Agree	Agree	Agree	Agree	Agree													No
Yes			No	Exercise & physical activity	Weight management	Medication (prescription only)		Physiotherapy	Nutrition as medicine (anti-inflammatory diet)					No										Disagree	Disagree	Disagree		Yes	Strongly Agree	Strongly Agree	Strongly Agree	Strongly Agree	Strongly Agree	Strongly Agree	Strongly Agree	Strongly Agree													No
Yes		Yes- I know someone		Exercise & physical activity	Weight management	Medication (prescription only)		Physiotherapy	Nutrition as medicine (anti-inflammatory diet)	Supplements (e.g., Chondroitin, Glucosamine)				Yes	NHS (website)									Agree	Agree	Agree		Yes	Agree	Agree	Stongly Disagree	Stongly Disagree	Strongly Agree	Strongly Agree	Strongly Agree	Neither agree nor disagree													No
Yes	Yes - myself			Exercise & physical activity	Weight management	Medication (prescription only)								No										Disagree	Disagree	Stongly Disagree		Yes	Agree	Agree	Strongly Agree	Neither agree nor disagree	Disagree	Neither agree nor disagree	Neither agree nor disagree	Disagree	Unlikely	Neutral	Interested	Neutral	Neutral	Slightly interested	Likely	Very Likely	Neither likely nor unlikely	Likely	Unlikely	Very Likely	No
Yes		Yes- I know someone		Exercise & physical activity	Weight management									No										Agree	Agree	Agree		Yes	Agree	Agree	Strongly Agree	Strongly Agree	Strongly Agree	Neither agree nor disagree	Strongly Agree	Agree													No
Yes			No	Exercise & physical activity				Physiotherapy				Surgery		No										Stongly Disagree	Stongly Disagree	Stongly Disagree		No	Stongly Disagree	Stongly Disagree	Stongly Disagree	Stongly Disagree	Stongly Disagree	Stongly Disagree	Stongly Disagree	Stongly Disagree													Yes, please explain
Yes	Yes - myself			Exercise & physical activity		Medication (prescription only)		Physiotherapy	Nutrition as medicine (anti-inflammatory diet)					Yes	NHS (website)		BBC Food (website)		Blogs					Agree	Agree	Agree		Yes	Agree	Agree	Neither agree nor disagree	Agree	Agree	Agree	Agree	Disagree	Neutral	Slightly interested	Not at all interested	Slightly interested	Interested	Not at all interested	Neither likely nor unlikely	Likely	Neither likely nor unlikely	Neither likely nor unlikely	Unlikely	Unlikely	No
Yes			No	Exercise & physical activity	Weight management	Medication (prescription only)		Physiotherapy						No										Neither agree nor disagree	Agree	Agree		Yes	Agree	Agree	Neither agree nor disagree	Agree	Agree	Agree	Agree	Neither agree nor disagree													No
Yes	Yes - myself			Exercise & physical activity	Weight management				Nutrition as medicine (anti-inflammatory diet)	Supplements (e.g., Chondroitin, Glucosamine)				Yes	NHS (website)									Agree	Agree	Agree		Yes	Strongly Agree	Strongly Agree	Neither agree nor disagree	Agree	Agree	Agree	Agree	Neither agree nor disagree	Likely	Interested	Interested	Interested	Neutral	Neutral	Unlikely	Unlikely	Very Unlikely	Unlikely	Very Unlikely	Likely	No
Yes	Yes - myself	Yes- I know someone		Exercise & physical activity	Weight management	Medication (prescription only)	Medication (over the counter)	Physiotherapy		Supplements (e.g., Chondroitin, Glucosamine)		Surgery		No										Disagree	Disagree	Disagree		No	Agree	Agree	Strongly Agree	Agree	Agree	Agree	Neither agree nor disagree	Neither agree nor disagree	Unlikely	Interested	Neutral	Neutral	Interested	Neutral	Likely	Likely	Likely	Likely	Neither likely nor unlikely	Neither likely nor unlikely	No
Yes		Yes- I know someone		Exercise & physical activity	Weight management	Medication (prescription only)		Physiotherapy	Nutrition as medicine (anti-inflammatory diet)					No										Agree	Agree	Agree		Yes	Strongly Agree	Strongly Agree	Strongly Agree	Disagree	Agree	Strongly Agree	Agree	Disagree													No
Yes		Yes- I know someone					Medication (over the counter)	Physiotherapy						No										Disagree	Disagree	Disagree		Yes	Agree	Agree	Neither agree nor disagree	Stongly Disagree	Neither agree nor disagree	Neither agree nor disagree	Agree	Disagree													No
Yes			No	Exercise & physical activity	Weight management	Medication (prescription only)	Medication (over the counter)	Physiotherapy	Nutrition as medicine (anti-inflammatory diet)	Supplements (e.g., Chondroitin, Glucosamine)				No										Stongly Disagree	Stongly Disagree	Agree		No	Agree	Strongly Agree	Agree	Agree	Agree	Agree	Agree	Agree													No
Yes		Yes- I know someone		Exercise & physical activity	Weight management	Medication (prescription only)	Medication (over the counter)	Physiotherapy	Nutrition as medicine (anti-inflammatory diet)	Supplements (e.g., Chondroitin, Glucosamine)		Surgery		Yes		NHS (doctor's advice)					Charities (e.g., Versus Arthritis, Arthritis Action)			Strongly Agree	Agree	Agree		Yes	Strongly Agree	Strongly Agree	Neither agree nor disagree	Neither agree nor disagree	Strongly Agree	Neither agree nor disagree	Neither agree nor disagree	Agree													Yes, please explain
Yes		Yes- I know someone		Exercise & physical activity	Weight management	Medication (prescription only)		Physiotherapy				Surgery		No										Neither agree nor disagree	Disagree	Disagree		Yes	Agree	Agree	Strongly Agree	Agree	Disagree	Agree	Strongly Agree	Strongly Agree													No
Yes	Yes - myself			Exercise & physical activity	Weight management	Medication (prescription only)		Physiotherapy						No										Agree	Neither agree nor disagree	Disagree		Yes	Agree	Agree	Agree	Disagree	Agree	Agree	Agree	Agree	Unlikely	Very interested	Not at all interested	Not at all interested	Very interested	Neutral	Likely	Likely	Likely	Likely	Neither likely nor unlikely	Very Likely	No
Yes	Yes - myself	Yes- I know someone		Exercise & physical activity	Weight management		Medication (over the counter)	Physiotherapy	Nutrition as medicine (anti-inflammatory diet)			Surgery		Yes	NHS (website)	NHS (doctor's advice)	BBC Food (website)				Charities (e.g., Versus Arthritis, Arthritis Action)			Agree	Agree	Agree		Yes	Agree	Agree	Neither agree nor disagree	Agree	Agree	Agree	Neither agree nor disagree	Neither agree nor disagree	Likely	Very interested	Interested	Interested	Interested	Slightly interested	Likely	Likely	Neither likely nor unlikely	Neither likely nor unlikely	Likely	Likely	No
Yes		Yes- I know someone		Exercise & physical activity	Weight management	Medication (prescription only)	Medication (over the counter)	Physiotherapy				Surgery		No										Disagree	Disagree	Stongly Disagree		Yes	Agree	Strongly Agree	Agree	Neither agree nor disagree	Agree	Agree	Agree	Neither agree nor disagree													No
Yes		Yes- I know someone		Exercise & physical activity	Weight management	Medication (prescription only)	Medication (over the counter)	Physiotherapy	Nutrition as medicine (anti-inflammatory diet)	Supplements (e.g., Chondroitin, Glucosamine)		Surgery		Yes	NHS (website)				Blogs	A dietitian/ nutritionist	Charities (e.g., Versus Arthritis, Arthritis Action)			Disagree	Neither agree nor disagree	Neither agree nor disagree		Yes	Agree	Agree	Neither agree nor disagree	Stongly Disagree	Agree	Strongly Agree	Agree	Stongly Disagree													Yes, please explain
Yes			No	Exercise & physical activity	Weight management	Medication (prescription only)		Physiotherapy	Nutrition as medicine (anti-inflammatory diet)					No										Stongly Disagree	Agree	Stongly Disagree		Yes	Agree	Neither agree nor disagree	Agree	Disagree	Agree	Neither agree nor disagree	Agree	Neither agree nor disagree													No
Yes		Yes- I know someone		Exercise & physical activity	Weight management	Medication (prescription only)		Physiotherapy						No										Stongly Disagree	Stongly Disagree	Agree		Yes	Strongly Agree	Strongly Agree	Neither agree nor disagree	Neither agree nor disagree	Strongly Agree	Strongly Agree	Agree	Agree													No
Yes	Yes - myself			Exercise & physical activity	Weight management		Medication (over the counter)		Nutrition as medicine (anti-inflammatory diet)	Supplements (e.g., Chondroitin, Glucosamine)		Surgery		Yes	NHS (website)							Other	YouTube	Neither agree nor disagree	Neither agree nor disagree	Neither agree nor disagree		Yes	Agree	Agree	Agree	Agree	Agree	Agree	Agree	Neither agree nor disagree	Neutral	Not at all interested	Not at all interested	Not at all interested	Not at all interested	Not at all interested	Likely	Likely	Neither likely nor unlikely	Very Unlikely	Neither likely nor unlikely	Very Likely	No
Yes	Yes - myself				Weight management	Medication (prescription only)								No										Disagree	Disagree	Neither agree nor disagree		Yes	Agree	Agree	Agree	Strongly Agree	Strongly Agree	Agree	Agree	Agree	Unlikely	Very interested	Not at all interested	Not at all interested	Very interested	Not at all interested	Unlikely	Likely	Unlikely	Unlikely	Unlikely	Likely	No
Yes		Yes- I know someone		Exercise & physical activity	Weight management	Medication (prescription only)			Nutrition as medicine (anti-inflammatory diet)					No										Agree	Agree	Neither agree nor disagree		Yes	Strongly Agree	Strongly Agree	Agree	Neither agree nor disagree	Agree	Agree	Strongly Agree	Neither agree nor disagree													No
Yes		Yes- I know someone		Exercise & physical activity	Weight management	Medication (prescription only)	Medication (over the counter)	Physiotherapy				Surgery		No										Agree	Agree	Disagree		No	Agree	Agree	Agree	Agree	Disagree	Agree	Agree	Agree													No
Yes		Yes- I know someone		Exercise & physical activity	Weight management	Medication (prescription only)		Physiotherapy	Nutrition as medicine (anti-inflammatory diet)	Supplements (e.g., Chondroitin, Glucosamine)				Yes	NHS (website)	NHS (doctor's advice)						Other	General internet search	Strongly Agree	Strongly Agree	Agree		Yes	Strongly Agree	Strongly Agree	Strongly Agree	Agree	Strongly Agree	Agree	Agree	Agree													No
Yes		Yes- I know someone			Weight management	Medication (prescription only)	Medication (over the counter)							Yes	NHS (website)							Other	General Web Searches	Neither agree nor disagree	Disagree	Agree		Yes	Strongly Agree	Agree	Agree	Agree	Agree	Agree	Strongly Agree	Neither agree nor disagree													No
Yes		Yes- I know someone		Exercise & physical activity	Weight management	Medication (prescription only)	Medication (over the counter)	Physiotherapy		Supplements (e.g., Chondroitin, Glucosamine)		Surgery		Yes	NHS (website)									Neither agree nor disagree	Neither agree nor disagree	Agree		Yes	Agree	Agree	Agree	Agree	Agree	Agree	Agree	Agree													No
Yes		Yes- I know someone		Exercise & physical activity	Weight management	Medication (prescription only)		Physiotherapy	Nutrition as medicine (anti-inflammatory diet)	Supplements (e.g., Chondroitin, Glucosamine)		Surgery		No										Agree	Neither agree nor disagree	Neither agree nor disagree		Yes	Strongly Agree	Strongly Agree	Strongly Agree	Strongly Agree	Strongly Agree	Strongly Agree	Strongly Agree	Strongly Agree													No
Yes			No										None of the above	No										Stongly Disagree	Stongly Disagree	Stongly Disagree		No	Strongly Agree	Strongly Agree	Strongly Agree	Strongly Agree	Strongly Agree	Strongly Agree	Strongly Agree	Neither agree nor disagree													No
Yes	Yes - myself			Exercise & physical activity	Weight management	Medication (prescription only)	Medication (over the counter)	Physiotherapy	Nutrition as medicine (anti-inflammatory diet)	Supplements (e.g., Chondroitin, Glucosamine)	Herbs	Surgery		Yes				Magazines (e.g., Women's/ Men's Health, Good Housekeeping)			Charities (e.g., Versus Arthritis, Arthritis Action)			Agree	Agree	Agree		Yes	Agree	Agree	Neither agree nor disagree	Agree	Agree	Agree	Agree	Agree	Unlikely	Slightly interested	Slightly interested	Slightly interested	Not at all interested	Slightly interested	Likely	Likely	Likely	Likely	Unlikely	Likely	Yes, please explain
Yes	Yes - myself			Exercise & physical activity	Weight management	Medication (prescription only)		Physiotherapy	Nutrition as medicine (anti-inflammatory diet)	Supplements (e.g., Chondroitin, Glucosamine)		Surgery		Yes	NHS (website)	NHS (doctor's advice)					Charities (e.g., Versus Arthritis, Arthritis Action)			Neither agree nor disagree	Disagree	Agree		Yes	Strongly Agree	Strongly Agree	Strongly Agree	Disagree	Agree	Agree	Strongly Agree	Neither agree nor disagree	Likely	Interested	Interested	Interested	Interested	Not at all interested	Very Unlikely	Likely	Unlikely	Unlikely	Very Unlikely	Very Unlikely	No
Yes		Yes- I know someone		Exercise & physical activity	Weight management					Supplements (e.g., Chondroitin, Glucosamine)				Yes		NHS (doctor's advice)								Neither agree nor disagree	Disagree	Disagree		Yes	Agree	Agree	Agree	Neither agree nor disagree	Agree	Agree	Agree	Agree													No
Yes		Yes- I know someone		Exercise & physical activity	Weight management			Physiotherapy	Nutrition as medicine (anti-inflammatory diet)	Supplements (e.g., Chondroitin, Glucosamine)	Herbs	Surgery		No										Agree	Neither agree nor disagree	Strongly Agree		Yes	Agree	Agree	Disagree	Neither agree nor disagree	Agree	Agree	Neither agree nor disagree	Disagree													No
Yes			No	Exercise & physical activity	Weight management	Medication (prescription only)								Yes		NHS (doctor's advice)								Disagree	Disagree	Disagree		Yes	Strongly Agree	Strongly Agree	Agree	Agree	Agree	Strongly Agree	Agree	Agree													No
Yes		Yes- I know someone		Exercise & physical activity	Weight management	Medication (prescription only)	Medication (over the counter)	Physiotherapy	Nutrition as medicine (anti-inflammatory diet)					Yes		NHS (doctor's advice)				A dietitian/ nutritionist				Neither agree nor disagree	Disagree	Neither agree nor disagree		Yes	Agree	Strongly Agree	Agree	Agree	Strongly Agree	Strongly Agree	Strongly Agree	Agree													No
Yes		Yes- I know someone		Exercise & physical activity	Weight management	Medication (prescription only)		Physiotherapy						No										Disagree	Disagree	Disagree		No	Neither agree nor disagree	Neither agree nor disagree	Neither agree nor disagree	Agree	Agree	Agree	Neither agree nor disagree	Neither agree nor disagree													No
Yes	Yes - myself	Yes- I know someone		Exercise & physical activity	Weight management	Medication (prescription only)	Medication (over the counter)							No										Disagree	Disagree	Stongly Disagree		Yes	Agree	Agree	Agree	Disagree	Agree	Neither agree nor disagree	Disagree	Disagree	Unlikely	Interested	Not at all interested	Slightly interested	Interested	Neutral	Very Unlikely	Likely	Neither likely nor unlikely	Very Unlikely	Very Unlikely	Very Likely	No
Yes		Yes- I know someone		Exercise & physical activity	Weight management	Medication (prescription only)		Physiotherapy						No										Disagree	Disagree	Disagree		Yes	Agree	Strongly Agree	Agree	Agree	Disagree	Agree	Agree	Agree													No
Yes		Yes- I know someone			Weight management	Medication (prescription only)				Supplements (e.g., Chondroitin, Glucosamine)				No										Disagree	Disagree	Stongly Disagree		No	Agree	Agree	Agree	Agree	Agree	Agree	Agree	Agree													Yes, please explain
Yes	Yes - myself	Yes- I know someone		Exercise & physical activity		Medication (prescription only)	Medication (over the counter)	Physiotherapy		Supplements (e.g., Chondroitin, Glucosamine)		Surgery		No										Stongly Disagree	Stongly Disagree	Stongly Disagree		Yes	Agree	Strongly Agree	Neither agree nor disagree	Agree	Agree	Strongly Agree	Strongly Agree	Disagree	Very unlikely	Slightly interested	Slightly interested	Slightly interested	Slightly interested	Slightly interested	Unlikely	Very Likely	Unlikely	Unlikely	Very Unlikely	Unlikely	Yes, please explain
Yes		Yes- I know someone		Exercise & physical activity	Weight management	Medication (prescription only)		Physiotherapy	Nutrition as medicine (anti-inflammatory diet)	Supplements (e.g., Chondroitin, Glucosamine)				No										Agree	Agree	Agree		Yes	Agree	Agree	Strongly Agree	Neither agree nor disagree	Neither agree nor disagree	Agree	Agree	Agree													No
Yes	Yes - myself			Exercise & physical activity	Weight management		Medication (over the counter)		Nutrition as medicine (anti-inflammatory diet)					No										Agree	Agree	Agree		Yes	Neither agree nor disagree	Agree	Disagree	Agree	Agree	Agree	Agree	Agree	Very likely	Slightly interested	Slightly interested	Slightly interested	Slightly interested	Slightly interested	Unlikely	Unlikely	Very Unlikely	Unlikely	Unlikely	Neither likely nor unlikely	No
Yes		Yes- I know someone											None of the above	No										Disagree	Disagree	Disagree		No	Neither agree nor disagree	Agree	Neither agree nor disagree	Agree	Neither agree nor disagree	Neither agree nor disagree	Neither agree nor disagree	Neither agree nor disagree													No
Yes	Yes - myself			Exercise & physical activity	Weight management	Medication (prescription only)	Medication (over the counter)	Physiotherapy	Nutrition as medicine (anti-inflammatory diet)	Supplements (e.g., Chondroitin, Glucosamine)		Surgery		No										Neither agree nor disagree	Disagree	Neither agree nor disagree		Yes	Agree	Strongly Agree	Agree	Strongly Agree	Agree	Agree	Agree	Agree	Neutral	Neutral	Neutral	Neutral	Neutral	Slightly interested	Very Likely	Neither likely nor unlikely	Neither likely nor unlikely	Likely	Unlikely	Very Likely	No
Yes		Yes- I know someone		Exercise & physical activity		Medication (prescription only)								No										Neither agree nor disagree	Neither agree nor disagree	Neither agree nor disagree		Yes	Strongly Agree	Strongly Agree	Neither agree nor disagree	Agree	Agree	Agree	Agree	Neither agree nor disagree													No
Yes		Yes- I know someone				Medication (prescription only)								No										Disagree	Agree	Disagree		No	Agree	Agree	Strongly Agree	Agree	Neither agree nor disagree	Neither agree nor disagree	Strongly Agree	Agree													No
Yes		Yes- I know someone				Medication (prescription only)		Physiotherapy		Supplements (e.g., Chondroitin, Glucosamine)				No										Disagree	Disagree	Disagree		Yes	Agree	Agree	Disagree	Agree	Agree	Strongly Agree	Strongly Agree	Neither agree nor disagree													No
Yes	Yes - myself	Yes- I know someone		Exercise & physical activity	Weight management	Medication (prescription only)	Medication (over the counter)	Physiotherapy		Supplements (e.g., Chondroitin, Glucosamine)		Surgery		No										Disagree	Disagree	Disagree		Yes	Neither agree nor disagree	Agree	Disagree	Agree	Agree	Agree	Disagree	Agree	Unlikely	Interested	Slightly interested	Slightly interested	Interested	Slightly interested	Unlikely	Neither likely nor unlikely	Unlikely	Unlikely	Unlikely	Likely	No
Yes		Yes- I know someone		Exercise & physical activity	Weight management	Medication (prescription only)	Medication (over the counter)	Physiotherapy	Nutrition as medicine (anti-inflammatory diet)			Surgery		No										Neither agree nor disagree	Neither agree nor disagree	Agree		Yes	Agree	Agree	Strongly Agree	Agree	Neither agree nor disagree	Strongly Agree	Strongly Agree	Strongly Agree													No
Yes		Yes- I know someone				Medication (prescription only)		Physiotherapy				Surgery		No										Disagree	Disagree	Disagree		Yes	Strongly Agree	Agree	Agree	Agree	Agree	Agree	Agree	Agree													No
Yes		Yes- I know someone		Exercise & physical activity	Weight management	Medication (prescription only)		Physiotherapy	Nutrition as medicine (anti-inflammatory diet)	Supplements (e.g., Chondroitin, Glucosamine)		Surgery		No										Disagree	Disagree	Disagree		Yes	Agree	Agree	Agree	Agree	Strongly Agree	Strongly Agree	Agree	Neither agree nor disagree													No
Yes		Yes- I know someone		Exercise & physical activity		Medication (prescription only)			Nutrition as medicine (anti-inflammatory diet)					Yes	NHS (website)									Strongly Agree	Agree	Agree		Yes	Strongly Agree	Strongly Agree	Agree	Strongly Agree	Strongly Agree	Agree	Strongly Agree	Agree													No
Yes		Yes- I know someone		Exercise & physical activity		Medication (prescription only)			Nutrition as medicine (anti-inflammatory diet)	Supplements (e.g., Chondroitin, Glucosamine)				No										Disagree	Disagree	Neither agree nor disagree		Yes	Agree	Agree	Agree	Agree	Agree	Agree	Agree	Agree													No
Yes		Yes- I know someone		Exercise & physical activity	Weight management		Medication (over the counter)							No										Neither agree nor disagree	Neither agree nor disagree	Neither agree nor disagree		Yes	Neither agree nor disagree	Disagree	Disagree	Neither agree nor disagree	Neither agree nor disagree	Disagree	Disagree	Agree													Yes, please explain
Yes	Yes - myself					Medication (prescription only)		Physiotherapy						No										Stongly Disagree	Stongly Disagree	Stongly Disagree		No	Disagree	Agree	Strongly Agree	Disagree	Disagree	Strongly Agree	Strongly Agree	Agree	Very unlikely	Slightly interested	Slightly interested	Neutral	Not at all interested	Not at all interested	Very Unlikely	Very Likely	Likely	Very Likely	Very Unlikely	Very Likely	No
Yes	Yes - myself	Yes- I know someone		Exercise & physical activity	Weight management	Medication (prescription only)	Medication (over the counter)	Physiotherapy	Nutrition as medicine (anti-inflammatory diet)	Supplements (e.g., Chondroitin, Glucosamine)	Herbs	Surgery		Yes							Charities (e.g., Versus Arthritis, Arthritis Action)	Other	google search	Disagree	Disagree	Stongly Disagree		No	Strongly Agree	Strongly Agree	Strongly Agree	Stongly Disagree	Strongly Agree	Strongly Agree	Stongly Disagree	Strongly Agree	Very unlikely	Very interested	Very interested	Very interested	Very interested	Very interested	Unlikely	Likely	Neither likely nor unlikely	Very Likely	Very Unlikely	Very Unlikely	No
Yes		Yes- I know someone		Exercise & physical activity	Weight management	Medication (prescription only)	Medication (over the counter)	Physiotherapy						No										Neither agree nor disagree	Agree	Agree		Yes	Neither agree nor disagree	Neither agree nor disagree	Agree	Agree	Disagree	Agree	Agree	Neither agree nor disagree													No
Yes		Yes- I know someone				Medication (prescription only)				Supplements (e.g., Chondroitin, Glucosamine)		Surgery		No										Disagree	Agree	Agree		Yes	Agree	Agree	Agree	Agree	Agree	Agree	Agree	Disagree													Yes, please explain
Yes		Yes- I know someone		Exercise & physical activity	Weight management	Medication (prescription only)		Physiotherapy		Supplements (e.g., Chondroitin, Glucosamine)				No										Neither agree nor disagree	Disagree	Disagree		No	Neither agree nor disagree	Agree	Agree	Agree	Agree	Agree	Neither agree nor disagree	Stongly Disagree													No
Yes		Yes- I know someone		Exercise & physical activity		Medication (prescription only)		Physiotherapy				Surgery		No										Disagree	Disagree	Disagree		Yes	Agree	Strongly Agree	Neither agree nor disagree	Agree	Agree	Agree	Agree	Agree													No
Yes	Yes - myself			Exercise & physical activity		Medication (prescription only)		Physiotherapy	Nutrition as medicine (anti-inflammatory diet)	Supplements (e.g., Chondroitin, Glucosamine)		Surgery		No										Neither agree nor disagree	Neither agree nor disagree	Agree		Yes	Agree	Agree	Agree	Neither agree nor disagree	Neither agree nor disagree	Agree	Agree	Neither agree nor disagree	Neutral	Not at all interested	Not at all interested	Not at all interested	Not at all interested	Not at all interested	Neither likely nor unlikely	Likely	Neither likely nor unlikely	Likely	Neither likely nor unlikely	Likely	No
Yes		Yes- I know someone			Weight management	Medication (prescription only)		Physiotherapy		Supplements (e.g., Chondroitin, Glucosamine)				No										Disagree	Disagree	Disagree		Yes	Agree	Agree	Agree	Agree	Disagree	Agree	Neither agree nor disagree	Agree													Yes, please explain
Yes		Yes- I know someone				Medication (prescription only)						Surgery		No										Neither agree nor disagree	Agree	Neither agree nor disagree		Yes	Agree	Agree	Agree	Agree	Agree	Agree	Neither agree nor disagree	Agree													No
Yes		Yes- I know someone			Weight management	Medication (prescription only)			Nutrition as medicine (anti-inflammatory diet)	Supplements (e.g., Chondroitin, Glucosamine)				No										Disagree	Disagree	Disagree		Yes	Agree	Agree	Agree	Agree	Strongly Agree	Strongly Agree	Strongly Agree	Agree													Yes, please explain
Yes		Yes- I know someone		Exercise & physical activity	Weight management	Medication (prescription only)	Medication (over the counter)	Physiotherapy	Nutrition as medicine (anti-inflammatory diet)	Supplements (e.g., Chondroitin, Glucosamine)				Yes	NHS (website)					A dietitian/ nutritionist				Strongly Agree	Strongly Agree	Strongly Agree		Yes	Strongly Agree	Agree	Stongly Disagree	Neither agree nor disagree	Strongly Agree	Strongly Agree	Agree	Neither agree nor disagree													No
Yes			No	Exercise & physical activity	Weight management	Medication (prescription only)		Physiotherapy	Nutrition as medicine (anti-inflammatory diet)	Supplements (e.g., Chondroitin, Glucosamine)				No										Disagree	Disagree	Disagree		Yes	Strongly Agree	Strongly Agree	Agree	Agree	Strongly Agree	Strongly Agree	Agree	Agree													No
Yes	Yes - myself			Exercise & physical activity	Weight management	Medication (prescription only)	Medication (over the counter)	Physiotherapy		Supplements (e.g., Chondroitin, Glucosamine)		Surgery		No										Disagree	Disagree	Disagree		Yes	Agree	Agree	Neither agree nor disagree	Neither agree nor disagree	Neither agree nor disagree	Agree	Agree	Strongly Agree	Neutral	Neutral	Neutral	Neutral	Not at all interested	Neutral	Unlikely	Very Likely	Neither likely nor unlikely	Neither likely nor unlikely	Very Unlikely	Neither likely nor unlikely	No
Yes	Yes - myself			Exercise & physical activity	Weight management				Nutrition as medicine (anti-inflammatory diet)	Supplements (e.g., Chondroitin, Glucosamine)		Surgery		Yes								Other		Agree	Agree	Agree		Yes	Agree	Agree	Disagree	Disagree	Strongly Agree	Agree	Disagree	Disagree	Unlikely	Interested	Interested	Interested	Interested	Interested	Unlikely	Very Unlikely	Unlikely	Very Unlikely	Very Unlikely	Unlikely	No
Yes		Yes- I know someone		Exercise & physical activity		Medication (prescription only)		Physiotherapy		Supplements (e.g., Chondroitin, Glucosamine)				No										Agree	Agree	Agree		Yes	Agree	Agree	Agree	Agree	Agree	Agree	Agree	Agree													No
Yes			No	Exercise & physical activity	Weight management	Medication (prescription only)			Nutrition as medicine (anti-inflammatory diet)	Supplements (e.g., Chondroitin, Glucosamine)				No										Neither agree nor disagree	Disagree	Neither agree nor disagree		No	Neither agree nor disagree	Disagree	Agree	Agree	Agree	Disagree	Agree	Disagree													No
Yes		Yes- I know someone		Exercise & physical activity	Weight management	Medication (prescription only)		Physiotherapy						No										Disagree	Disagree	Disagree		Yes	Agree	Agree	Agree	Neither agree nor disagree	Agree	Agree	Agree	Agree													No
Yes	Yes - myself	Yes- I know someone		Exercise & physical activity		Medication (prescription only)		Physiotherapy				Surgery		No										Disagree	Disagree	Disagree		Yes	Agree	Strongly Agree	Agree	Disagree	Neither agree nor disagree	Strongly Agree	Agree	Strongly Agree	Unlikely	Interested	Very interested	Interested	Interested	Neutral	Very Likely	Very Likely	Unlikely	Very Unlikely	Very Unlikely	Likely	No
Yes	Yes - myself	Yes- I know someone		Exercise & physical activity	Weight management	Medication (prescription only)		Physiotherapy	Nutrition as medicine (anti-inflammatory diet)	Supplements (e.g., Chondroitin, Glucosamine)		Surgery		Yes	NHS (website)	NHS (doctor's advice)				A dietitian/ nutritionist				Neither agree nor disagree	Neither agree nor disagree	Neither agree nor disagree		Yes	Agree	Agree	Agree	Agree	Agree	Agree	Agree	Agree	Unlikely	Interested	Interested	Interested	Interested	Interested	Likely	Neither likely nor unlikely	Unlikely	Likely	Unlikely	Very Likely	Yes, please explain
Yes			No	Exercise & physical activity	Weight management	Medication (prescription only)	Medication (over the counter)	Physiotherapy		Supplements (e.g., Chondroitin, Glucosamine)		Surgery		No										Agree	Agree	Disagree		Yes	Strongly Agree	Strongly Agree	Agree	Agree	Strongly Agree	Strongly Agree	Agree	Agree													No
Yes		Yes- I know someone					Medication (over the counter)		Nutrition as medicine (anti-inflammatory diet)					Yes	NHS (website)	NHS (doctor's advice)						Other		Agree	Agree	Agree		Yes	Agree	Neither agree nor disagree	Agree	Agree	Strongly Agree	Strongly Agree	Strongly Agree	Strongly Agree													No
Yes	Yes - myself	Yes- I know someone			Weight management	Medication (prescription only)	Medication (over the counter)					Surgery		No										Stongly Disagree	Stongly Disagree	Stongly Disagree		Yes	Strongly Agree	Agree	Neither agree nor disagree	Neither agree nor disagree	Agree	Agree	Agree	Disagree	Very unlikely	Interested	Slightly interested	Interested	Interested	Slightly interested	Unlikely	Very Likely	Unlikely	Neither likely nor unlikely	Unlikely	Likely	No
Yes			No										None of the above	No										Stongly Disagree	Stongly Disagree	Stongly Disagree		No	Strongly Agree	Strongly Agree	Strongly Agree	Strongly Agree	Neither agree nor disagree	Agree	Agree	Neither agree nor disagree													No
Yes		Yes- I know someone		Exercise & physical activity	Weight management									No										Disagree	Disagree	Agree		No	Neither agree nor disagree	Agree	Disagree	Disagree	Neither agree nor disagree	Agree	Agree	Disagree													Yes, please explain
Yes		Yes- I know someone		Exercise & physical activity	Weight management	Medication (prescription only)			Nutrition as medicine (anti-inflammatory diet)	Supplements (e.g., Chondroitin, Glucosamine)				Yes								Other	Michael Greger books & Nutrition Facts channel on YouTube	Agree	Agree	Agree		Yes	Agree	Agree	Stongly Disagree	Neither agree nor disagree	Neither agree nor disagree	Neither agree nor disagree	Agree	Neither agree nor disagree													No
Yes		Yes- I know someone				Medication (prescription only)								No										Disagree	Disagree	Stongly Disagree		No	Neither agree nor disagree	Neither agree nor disagree	Strongly Agree	Strongly Agree	Strongly Agree	Neither agree nor disagree	Neither agree nor disagree	Neither agree nor disagree													No
Yes	Yes - myself			Exercise & physical activity	Weight management	Medication (prescription only)		Physiotherapy	Nutrition as medicine (anti-inflammatory diet)	Supplements (e.g., Chondroitin, Glucosamine)	Herbs	Surgery	None of the above	No										Disagree	Disagree	Disagree		Yes	Strongly Agree	Strongly Agree	Strongly Agree	Strongly Agree	Strongly Agree	Strongly Agree	Strongly Agree	Strongly Agree	Very likely	Very interested	Interested	Interested	Very interested	Interested	Unlikely	Likely	Likely	Likely	Neither likely nor unlikely	Likely	No
Yes			No	Exercise & physical activity	Weight management	Medication (prescription only)				Supplements (e.g., Chondroitin, Glucosamine)				No										Neither agree nor disagree	Disagree	Disagree		No	Agree	Neither agree nor disagree	Agree	Agree	Agree	Neither agree nor disagree	Agree	Agree													No
Yes		Yes- I know someone		Exercise & physical activity	Weight management	Medication (prescription only)	Medication (over the counter)	Physiotherapy	Nutrition as medicine (anti-inflammatory diet)					No										Disagree	Disagree	Neither agree nor disagree		Yes	Strongly Agree	Strongly Agree	Neither agree nor disagree	Agree	Agree	Agree	Strongly Agree	Disagree													No
Yes		Yes- I know someone		Exercise & physical activity		Medication (prescription only)	Medication (over the counter)	Physiotherapy		Supplements (e.g., Chondroitin, Glucosamine)		Surgery		No										Stongly Disagree	Stongly Disagree	Stongly Disagree		Yes	Strongly Agree	Strongly Agree	Strongly Agree	Strongly Agree	Strongly Agree	Strongly Agree	Strongly Agree	Strongly Agree													No
Yes			No			Medication (prescription only)	Medication (over the counter)							No										Stongly Disagree	Stongly Disagree	Stongly Disagree		Yes	Agree	Agree	Disagree	Agree	Strongly Agree	Agree	Agree	Agree													Yes, please explain
Yes		Yes- I know someone		Exercise & physical activity	Weight management	Medication (prescription only)		Physiotherapy						No										Agree	Neither agree nor disagree	Agree		Yes	Agree	Agree	Agree	Agree	Agree	Agree	Agree	Neither agree nor disagree													No
Yes		Yes- I know someone		Exercise & physical activity	Weight management		Medication (over the counter)			Supplements (e.g., Chondroitin, Glucosamine)				No										Agree	Disagree	Neither agree nor disagree		Yes	Strongly Agree	Strongly Agree	Neither agree nor disagree	Neither agree nor disagree	Neither agree nor disagree	Agree	Agree	Disagree													No
Yes	Yes - myself	Yes- I know someone		Exercise & physical activity	Weight management	Medication (prescription only)				Supplements (e.g., Chondroitin, Glucosamine)				Yes								Other	Amazon and general googling	Disagree	Disagree	Disagree		Yes	Agree	Agree	Disagree	Neither agree nor disagree	Strongly Agree	Agree	Neither agree nor disagree	Disagree	Neutral	Slightly interested	Neutral	Neutral	Slightly interested	Slightly interested	Likely	Likely	Unlikely	Neither likely nor unlikely	Very Unlikely	Likely	No
Yes	Yes - myself				Weight management	Medication (prescription only)			Nutrition as medicine (anti-inflammatory diet)	Supplements (e.g., Chondroitin, Glucosamine)				Yes	NHS (website)	NHS (doctor's advice)								Agree	Agree	Agree		Yes	Agree	Neither agree nor disagree	Agree	Agree	Agree	Neither agree nor disagree	Agree	Agree	Unlikely	Neutral	Slightly interested	Interested	Neutral	Not at all interested	Unlikely	Neither likely nor unlikely	Likely	Likely	Unlikely	Likely	No
Yes		Yes- I know someone		Exercise & physical activity	Weight management	Medication (prescription only)		Physiotherapy				Surgery		No										Agree	Disagree	Agree		Yes	Agree	Agree	Agree	Agree	Disagree	Agree	Agree	Disagree													No
Yes			No		Weight management	Medication (prescription only)			Nutrition as medicine (anti-inflammatory diet)					No										Agree	Agree	Agree		Yes	Agree	Agree	Agree	Agree	Agree	Agree	Agree	Disagree													Yes, please explain
Yes		Yes- I know someone		Exercise & physical activity		Medication (prescription only)	Medication (over the counter)	Physiotherapy						Yes	NHS (website)	NHS (doctor's advice)					Charities (e.g., Versus Arthritis, Arthritis Action)			Agree	Neither agree nor disagree	Neither agree nor disagree		Yes	Strongly Agree	Strongly Agree	Agree	Strongly Agree	Strongly Agree	Strongly Agree	Agree	Agree													No
Yes	Yes - myself			Exercise & physical activity	Weight management	Medication (prescription only)	Medication (over the counter)	Physiotherapy	Nutrition as medicine (anti-inflammatory diet)					No										Neither agree nor disagree	Agree	Agree		Yes	Strongly Agree	Strongly Agree	Strongly Agree	Strongly Agree	Strongly Agree	Strongly Agree	Strongly Agree	Neither agree nor disagree	Neutral	Very interested	Neutral	Very interested	Very interested	Neutral	Likely	Likely	Unlikely	Likely	Neither likely nor unlikely	Likely	No
Yes		Yes- I know someone		Exercise & physical activity	Weight management			Physiotherapy		Supplements (e.g., Chondroitin, Glucosamine)				No										Disagree	Disagree	Neither agree nor disagree		Yes	Agree	Agree	Neither agree nor disagree	Disagree	Agree	Strongly Agree	Neither agree nor disagree	Neither agree nor disagree													Yes, please explain
Yes		Yes- I know someone		Exercise & physical activity	Weight management	Medication (prescription only)		Physiotherapy	Nutrition as medicine (anti-inflammatory diet)			Surgery		No										Agree	Agree	Agree		Yes	Strongly Agree	Strongly Agree	Strongly Agree	Strongly Agree	Strongly Agree	Strongly Agree	Strongly Agree	Strongly Agree													No
Yes		Yes- I know someone		Exercise & physical activity	Weight management	Medication (prescription only)		Physiotherapy	Nutrition as medicine (anti-inflammatory diet)	Supplements (e.g., Chondroitin, Glucosamine)				Yes		NHS (doctor's advice)						Other	online communities i.e. Reddit	Agree	Agree	Agree		Yes	Agree	Agree	Disagree	Agree	Agree	Agree	Agree	Neither agree nor disagree													Yes, please explain
Yes	Yes - myself	Yes- I know someone		Exercise & physical activity	Weight management	Medication (prescription only)	Medication (over the counter)	Physiotherapy	Nutrition as medicine (anti-inflammatory diet)	Supplements (e.g., Chondroitin, Glucosamine)		Surgery		No										Agree	Disagree	Disagree		Yes	Strongly Agree	Strongly Agree	Strongly Agree	Strongly Agree	Strongly Agree	Strongly Agree	Strongly Agree	Strongly Agree	Neutral	Very interested	Interested	Very interested	Very interested	Very interested	Likely	Very Likely	Unlikely	Unlikely	Very Unlikely	Likely	No
Yes		Yes- I know someone								Supplements (e.g., Chondroitin, Glucosamine)				No										Disagree	Neither agree nor disagree	Neither agree nor disagree		Yes	Strongly Agree	Strongly Agree	Agree	Strongly Agree	Strongly Agree	Agree	Agree	Agree													No
Yes	Yes - myself			Exercise & physical activity	Weight management			Physiotherapy	Nutrition as medicine (anti-inflammatory diet)	Supplements (e.g., Chondroitin, Glucosamine)				Yes	NHS (website)				Blogs					Agree	Agree	Agree		Yes	Strongly Agree	Strongly Agree	Disagree	Agree	Agree	Agree	Neither agree nor disagree	Stongly Disagree	Neutral	Neutral	Neutral	Neutral	Interested	Slightly interested	Very Likely	Neither likely nor unlikely	Unlikely	Neither likely nor unlikely	Neither likely nor unlikely	Very Likely	No
Yes			No	Exercise & physical activity	Weight management	Medication (prescription only)	Medication (over the counter)	Physiotherapy				Surgery		No										Disagree	Disagree	Stongly Disagree		Yes	Agree	Agree	Agree	Agree	Agree	Agree	Agree	Agree													No
Yes		Yes- I know someone			Weight management	Medication (prescription only)	Medication (over the counter)		Nutrition as medicine (anti-inflammatory diet)	Supplements (e.g., Chondroitin, Glucosamine)		Surgery		No										Neither agree nor disagree	Neither agree nor disagree	Disagree		No	Neither agree nor disagree	Agree	Agree	Agree	Neither agree nor disagree	Agree	Neither agree nor disagree	Agree													No
Yes			No	Exercise & physical activity	Weight management	Medication (prescription only)								No										Agree	Agree	Agree		Yes	Strongly Agree	Strongly Agree	Disagree	Agree	Agree	Agree	Agree	Disagree													No
Yes		Yes- I know someone		Exercise & physical activity	Weight management									No										Disagree	Disagree	Disagree		Yes	Strongly Agree	Strongly Agree	Strongly Agree	Strongly Agree	Strongly Agree	Strongly Agree	Strongly Agree	Strongly Agree													No
Yes	Yes - myself			Exercise & physical activity	Weight management	Medication (prescription only)	Medication (over the counter)	Physiotherapy	Nutrition as medicine (anti-inflammatory diet)			Surgery		No										Agree	Disagree	Disagree		No	Neither agree nor disagree	Strongly Agree	Agree	Agree	Neither agree nor disagree	Agree	Neither agree nor disagree	Agree	Unlikely	Interested	Neutral	Not at all interested	Slightly interested	Not at all interested	Neither likely nor unlikely	Likely	Unlikely	Likely	Very Unlikely	Neither likely nor unlikely	No
Yes	Yes - myself	Yes- I know someone		Exercise & physical activity	Weight management	Medication (prescription only)	Medication (over the counter)	Physiotherapy	Nutrition as medicine (anti-inflammatory diet)	Supplements (e.g., Chondroitin, Glucosamine)		Surgery		Yes	NHS (website)	NHS (doctor's advice)					Charities (e.g., Versus Arthritis, Arthritis Action)			Agree	Agree	Neither agree nor disagree		Yes	Agree	Strongly Agree	Stongly Disagree	Disagree	Strongly Agree	Agree	Agree	Neither agree nor disagree	Unlikely	Slightly interested	Neutral	Neutral	Slightly interested	Not at all interested	Likely	Likely	Unlikely	Likely	Very Unlikely	Likely	No
Yes	Yes - myself			Exercise & physical activity	Weight management		Medication (over the counter)	Physiotherapy	Nutrition as medicine (anti-inflammatory diet)	Supplements (e.g., Chondroitin, Glucosamine)	Herbs	Surgery		Yes	NHS (website)		BBC Food (website)			A dietitian/ nutritionist	Charities (e.g., Versus Arthritis, Arthritis Action)			Neither agree nor disagree	Neither agree nor disagree	Disagree		Yes	Agree	Strongly Agree	Disagree	Agree	Agree	Strongly Agree	Agree	Strongly Agree	Neutral	Very interested	Interested	Interested	Not at all interested	Interested	Neither likely nor unlikely	Very Likely	Unlikely	Unlikely	Very Unlikely	Likely	No
Yes	Yes - myself			Exercise & physical activity	Weight management			Physiotherapy		Supplements (e.g., Chondroitin, Glucosamine)				No										Disagree	Disagree	Disagree		No	Agree	Agree	Agree	Strongly Agree	Strongly Agree	Neither agree nor disagree	Disagree	Stongly Disagree	Very unlikely	Neutral	Not at all interested	Not at all interested	Not at all interested	Not at all interested	Likely	Very Likely	Likely	Very Likely	Neither likely nor unlikely	Neither likely nor unlikely	No
Yes			No	Exercise & physical activity		Medication (prescription only)			Nutrition as medicine (anti-inflammatory diet)	Supplements (e.g., Chondroitin, Glucosamine)				Yes					Blogs			Other		Neither agree nor disagree	Neither agree nor disagree	Disagree		Yes	Agree	Agree	Neither agree nor disagree	Disagree	Agree	Agree	Agree	Neither agree nor disagree													No
Yes	Yes - myself	Yes- I know someone		Exercise & physical activity	Weight management	Medication (prescription only)	Medication (over the counter)	Physiotherapy		Supplements (e.g., Chondroitin, Glucosamine)		Surgery		Yes	NHS (website)		BBC Food (website)				Charities (e.g., Versus Arthritis, Arthritis Action)			Neither agree nor disagree	Agree	Neither agree nor disagree		Yes	Strongly Agree	Strongly Agree	Neither agree nor disagree	Agree	Agree	Strongly Agree	Agree	Agree	Likely	Interested	Slightly interested	Neutral	Interested	Interested	Likely	Likely	Unlikely	Neither likely nor unlikely	Likely	Very Likely	No
Yes	Yes - myself	Yes- I know someone		Exercise & physical activity	Weight management									No										Agree	Neither agree nor disagree	Neither agree nor disagree		Yes	Agree	Agree	Disagree	Agree	Agree	Neither agree nor disagree	Neither agree nor disagree	Agree	Neutral	Neutral	Neutral	Neutral	Neutral	Neutral	Likely	Neither likely nor unlikely	Unlikely	Unlikely	Very Unlikely	Likely	No
Yes		Yes- I know someone		Exercise & physical activity		Medication (prescription only)		Physiotherapy						Yes	NHS (website)				Blogs					Agree	Neither agree nor disagree	Agree		Yes	Agree	Neither agree nor disagree	Disagree	Disagree	Neither agree nor disagree	Strongly Agree	Agree	Neither agree nor disagree													No
Yes		Yes- I know someone				Medication (prescription only)		Physiotherapy				Surgery		No										Stongly Disagree	Stongly Disagree	Stongly Disagree		Yes	Agree	Strongly Agree	Strongly Agree	Strongly Agree	Strongly Agree	Strongly Agree	Agree	Neither agree nor disagree													No
Yes		Yes- I know someone		Exercise & physical activity	Weight management	Medication (prescription only)		Physiotherapy						No										Disagree	Disagree	Disagree		Yes	Agree	Agree	Neither agree nor disagree	Agree	Strongly Agree	Strongly Agree	Neither agree nor disagree	Disagree													No
Yes		Yes- I know someone		Exercise & physical activity	Weight management	Medication (prescription only)		Physiotherapy	Nutrition as medicine (anti-inflammatory diet)					No										Agree	Agree	Agree		Yes	Strongly Agree	Strongly Agree	Neither agree nor disagree	Stongly Disagree	Agree	Agree	Agree	Stongly Disagree													Yes, please explain
Yes	Yes - myself				Weight management	Medication (prescription only)	Medication (over the counter)			Supplements (e.g., Chondroitin, Glucosamine)		Surgery		No										Stongly Disagree	Stongly Disagree	Stongly Disagree		Yes	Strongly Agree	Agree	Agree	Agree	Agree	Agree	Agree	Agree	Very unlikely	Very interested	Interested	Interested	Very interested	Very interested	Likely	Very Likely	Neither likely nor unlikely	Likely	Neither likely nor unlikely	Very Likely	No
Yes		Yes- I know someone		Exercise & physical activity		Medication (prescription only)	Medication (over the counter)							No										Stongly Disagree	Stongly Disagree	Neither agree nor disagree		Yes	Agree	Strongly Agree	Agree	Agree	Neither agree nor disagree	Agree	Neither agree nor disagree	Neither agree nor disagree													Yes, please explain
Yes	Yes - myself				Weight management	Medication (prescription only)	Medication (over the counter)	Physiotherapy	Nutrition as medicine (anti-inflammatory diet)	Supplements (e.g., Chondroitin, Glucosamine)				Yes	NHS (website)									Agree	Disagree	Neither agree nor disagree		Yes	Agree	Strongly Agree	Agree	Agree	Agree	Agree	Agree	Neither agree nor disagree	Likely	Interested	Interested	Interested	Neutral	Neutral	Likely	Very Likely	Unlikely	Likely	Neither likely nor unlikely	Very Likely	No
Yes	Yes - myself			Exercise & physical activity				Physiotherapy				Surgery		No										Stongly Disagree	Stongly Disagree	Stongly Disagree		Yes	Strongly Agree	Strongly Agree	Agree	Stongly Disagree	Strongly Agree	Strongly Agree	Strongly Agree	Neither agree nor disagree	Unlikely	Very interested	Neutral	Interested	Very interested	Interested	Very Unlikely	Very Likely	Very Unlikely	Unlikely	Very Unlikely	Neither likely nor unlikely	No
Yes		Yes- I know someone		Exercise & physical activity	Weight management	Medication (prescription only)		Physiotherapy	Nutrition as medicine (anti-inflammatory diet)	Supplements (e.g., Chondroitin, Glucosamine)		Surgery		No										Disagree	Disagree	Disagree		No	Strongly Agree	Strongly Agree	Strongly Agree	Strongly Agree	Strongly Agree	Strongly Agree	Strongly Agree	Neither agree nor disagree													No
Yes		Yes- I know someone		Exercise & physical activity	Weight management		Medication (over the counter)							Yes	NHS (website)	NHS (doctor's advice)								Disagree	Stongly Disagree	Stongly Disagree		Yes	Strongly Agree	Strongly Agree	Stongly Disagree	Strongly Agree	Neither agree nor disagree	Strongly Agree	Strongly Agree	Neither agree nor disagree													No
Yes	Yes - myself			Exercise & physical activity	Weight management	Medication (prescription only)	Medication (over the counter)	Physiotherapy		Supplements (e.g., Chondroitin, Glucosamine)		Surgery		No										Disagree	Disagree	Disagree		No	Agree	Agree	Disagree	Agree	Agree	Agree	Agree	Neither agree nor disagree	Very unlikely	Neutral	Neutral	Not at all interested	Neutral	Not at all interested	Unlikely	Likely	Very Unlikely	Very Unlikely	Very Unlikely	Unlikely	No
Yes		Yes- I know someone		Exercise & physical activity	Weight management	Medication (prescription only)	Medication (over the counter)	Physiotherapy	Nutrition as medicine (anti-inflammatory diet)	Supplements (e.g., Chondroitin, Glucosamine)	Herbs	Surgery		Yes	NHS (website)				Blogs	A dietitian/ nutritionist				Agree	Agree	Agree		Yes	Strongly Agree	Strongly Agree	Disagree	Disagree	Agree	Strongly Agree	Agree	Disagree													No
Yes		Yes- I know someone		Exercise & physical activity			Medication (over the counter)	Physiotherapy						No										Disagree	Disagree	Neither agree nor disagree		Yes	Agree	Agree	Neither agree nor disagree	Agree	Agree	Agree	Agree	Disagree													No
Yes	Yes - myself	Yes- I know someone		Exercise & physical activity	Weight management	Medication (prescription only)		Physiotherapy	Nutrition as medicine (anti-inflammatory diet)	Supplements (e.g., Chondroitin, Glucosamine)		Surgery		Yes	NHS (website)	NHS (doctor's advice)				A dietitian/ nutritionist	Charities (e.g., Versus Arthritis, Arthritis Action)			Agree	Strongly Agree	Agree		Yes	Strongly Agree	Agree	Strongly Agree	Strongly Agree	Strongly Agree	Agree	Agree	Neither agree nor disagree	Very likely	Slightly interested	Not at all interested	Slightly interested	Slightly interested	Slightly interested	Likely	Very Likely	Likely	Very Likely	Unlikely	Likely	No
Yes	Yes - myself			Exercise & physical activity	Weight management	Medication (prescription only)		Physiotherapy		Supplements (e.g., Chondroitin, Glucosamine)				Yes	NHS (website)			Magazines (e.g., Women's/ Men's Health, Good Housekeeping)		A dietitian/ nutritionist				Agree	Agree	Neither agree nor disagree		Yes	Strongly Agree	Agree	Neither agree nor disagree	Neither agree nor disagree	Neither agree nor disagree	Agree	Agree	Disagree	Likely	Very interested	Very interested	Interested	Interested	Interested	Very Likely	Likely	Unlikely	Neither likely nor unlikely	Very Unlikely	Likely	No
Yes		Yes- I know someone		Exercise & physical activity	Weight management			Physiotherapy		Supplements (e.g., Chondroitin, Glucosamine)				No										Disagree	Disagree	Disagree		No	Agree	Agree	Agree	Agree	Agree	Agree	Agree	Neither agree nor disagree													Yes, please explain
Yes	Yes - myself			Exercise & physical activity	Weight management									No										Disagree	Disagree	Agree		Yes	Strongly Agree	Strongly Agree	Agree	Agree	Disagree	Neither agree nor disagree	Strongly Agree	Neither agree nor disagree	Very likely	Slightly interested	Interested	Neutral	Slightly interested	Neutral	Very Unlikely	Unlikely	Very Unlikely	Very Unlikely	Very Unlikely	Very Unlikely	No
Yes		Yes- I know someone				Medication (prescription only)		Physiotherapy						No										Stongly Disagree	Stongly Disagree	Disagree		Yes	Agree	Agree	Neither agree nor disagree	Neither agree nor disagree	Agree	Agree	Agree	Neither agree nor disagree													No
Yes	Yes - myself			Exercise & physical activity		Medication (prescription only)	Medication (over the counter)							No										Disagree	Disagree	Disagree		Yes	Agree	Agree	Neither agree nor disagree	Neither agree nor disagree	Agree	Agree	Agree	Neither agree nor disagree	Neutral	Slightly interested	Not at all interested	Neutral	Neutral	Neutral	Neither likely nor unlikely	Likely	Unlikely	Likely	Unlikely	Very Likely	No
Yes		Yes- I know someone		Exercise & physical activity	Weight management	Medication (prescription only)				Supplements (e.g., Chondroitin, Glucosamine)		Surgery		No										Disagree	Disagree	Disagree		Yes	Agree	Agree	Agree	Disagree	Agree	Agree	Agree	Agree													No
Yes		Yes- I know someone		Exercise & physical activity		Medication (prescription only)			Nutrition as medicine (anti-inflammatory diet)	Supplements (e.g., Chondroitin, Glucosamine)				No										Neither agree nor disagree	Neither agree nor disagree	Agree		Yes	Agree	Agree	Strongly Agree	Neither agree nor disagree	Agree	Agree	Agree	Agree													Yes, please explain
Yes		Yes- I know someone		Exercise & physical activity	Weight management	Medication (prescription only)			Nutrition as medicine (anti-inflammatory diet)					Yes	NHS (website)						Charities (e.g., Versus Arthritis, Arthritis Action)			Disagree	Neither agree nor disagree	Neither agree nor disagree		Yes	Agree	Agree	Neither agree nor disagree	Agree	Strongly Agree	Agree	Disagree	Disagree													No
Yes		Yes- I know someone		Exercise & physical activity	Weight management	Medication (prescription only)	Medication (over the counter)	Physiotherapy	Nutrition as medicine (anti-inflammatory diet)	Supplements (e.g., Chondroitin, Glucosamine)	Herbs	Surgery		No										Neither agree nor disagree	Disagree	Stongly Disagree		No	Neither agree nor disagree	Neither agree nor disagree	Agree	Agree	Agree	Agree	Agree	Disagree													No
Yes			No		Weight management									No										Neither agree nor disagree	Neither agree nor disagree	Agree		Yes	Agree	Strongly Agree	Strongly Agree	Agree	Agree	Neither agree nor disagree	Strongly Agree	Agree													No
Yes	Yes - myself				Weight management	Medication (prescription only)	Medication (over the counter)	Physiotherapy						Yes	NHS (website)	NHS (doctor's advice)				A dietitian/ nutritionist				Neither agree nor disagree	Disagree	Disagree		Yes	Agree	Agree	Agree	Agree	Disagree	Agree	Agree	Disagree	Unlikely	Neutral	Interested	Not at all interested	Not at all interested	Not at all interested	Unlikely	Very Likely	Very Unlikely	Likely	Very Unlikely	Neither likely nor unlikely	No
Yes		Yes- I know someone		Exercise & physical activity	Weight management	Medication (prescription only)	Medication (over the counter)	Physiotherapy	Nutrition as medicine (anti-inflammatory diet)	Supplements (e.g., Chondroitin, Glucosamine)		Surgery		No										Neither agree nor disagree	Neither agree nor disagree	Agree		Yes	Strongly Agree	Strongly Agree	Neither agree nor disagree	Agree	Strongly Agree	Strongly Agree	Neither agree nor disagree	Neither agree nor disagree													No
Yes	Yes - myself			Exercise & physical activity	Weight management			Physiotherapy				Surgery		No										Stongly Disagree	Stongly Disagree	Stongly Disagree		Yes	Agree	Agree	Disagree	Disagree	Agree	Neither agree nor disagree	Agree	Disagree	Very unlikely	Interested	Slightly interested	Neutral	Interested	Interested	Neither likely nor unlikely	Very Likely	Neither likely nor unlikely	Unlikely	Very Unlikely	Very Likely	No
Yes	Yes - myself	Yes- I know someone		Exercise & physical activity	Weight management	Medication (prescription only)	Medication (over the counter)	Physiotherapy	Nutrition as medicine (anti-inflammatory diet)	Supplements (e.g., Chondroitin, Glucosamine)		Surgery		No										Agree	Disagree	Disagree		Yes	Agree	Strongly Agree	Strongly Agree	Agree	Agree	Strongly Agree	Neither agree nor disagree	Neither agree nor disagree	Unlikely	Interested	Interested	Neutral	Slightly interested	Slightly interested	Very Unlikely	Likely	Very Unlikely	Unlikely	Very Unlikely	Likely	No
Yes			No				Medication (over the counter)							No										Disagree	Disagree	Disagree		Yes	Agree	Agree	Agree	Agree	Agree	Agree	Neither agree nor disagree	Neither agree nor disagree													No
Yes			No	Exercise & physical activity		Medication (prescription only)		Physiotherapy		Supplements (e.g., Chondroitin, Glucosamine)				No										Stongly Disagree	Stongly Disagree	Stongly Disagree		Yes	Strongly Agree	Strongly Agree	Agree	Agree	Agree	Agree	Agree	Neither agree nor disagree													No
Yes		Yes- I know someone		Exercise & physical activity	Weight management			Physiotherapy		Supplements (e.g., Chondroitin, Glucosamine)		Surgery		Yes	NHS (website)				Blogs					Neither agree nor disagree	Neither agree nor disagree	Disagree		Yes	Neither agree nor disagree	Agree	Disagree	Agree	Agree	Agree	Agree	Agree													Yes, please explain
Yes	Yes - myself			Exercise & physical activity		Medication (prescription only)	Medication (over the counter)			Supplements (e.g., Chondroitin, Glucosamine)		Surgery		No										Disagree	Agree	Agree		Yes	Agree	Strongly Agree	Agree	Agree	Agree	Agree	Agree	Disagree	Likely	Interested	Interested	Interested	Interested	Interested	Likely	Very Likely	Very Unlikely	Very Unlikely	Very Unlikely	Unlikely	No
Yes	Yes - myself			Exercise & physical activity	Weight management		Medication (over the counter)							Yes	NHS (website)	NHS (doctor's advice)								Disagree	Disagree	Agree		No	Disagree	Agree	Agree	Agree	Agree	Agree	Agree	Disagree	Unlikely	Slightly interested	Not at all interested	Not at all interested	Slightly interested	Not at all interested	Unlikely	Likely	Unlikely	Likely	Likely	Very Likely	No
Yes	Yes - myself			Exercise & physical activity		Medication (prescription only)						Surgery		No										Neither agree nor disagree	Strongly Agree	Stongly Disagree		Yes	Agree	Agree	Strongly Agree	Stongly Disagree	Stongly Disagree	Neither agree nor disagree	Agree	Strongly Agree	Very unlikely	Neutral	Neutral	Neutral	Interested	Interested	Likely	Very Likely	Neither likely nor unlikely	Unlikely	Very Unlikely	Very Unlikely	No
Yes		Yes- I know someone				Medication (prescription only)	Medication (over the counter)	Physiotherapy	Nutrition as medicine (anti-inflammatory diet)	Supplements (e.g., Chondroitin, Glucosamine)				No										Neither agree nor disagree	Agree	Disagree		Yes	Strongly Agree	Agree	Agree	Neither agree nor disagree	Agree	Strongly Agree	Agree	Neither agree nor disagree													No
Yes		Yes- I know someone		Exercise & physical activity	Weight management	Medication (prescription only)								No										Agree	Agree	Agree		No	Agree	Agree	Strongly Agree	Disagree	Agree	Strongly Agree	Disagree	Neither agree nor disagree													No
Yes	Yes - myself			Exercise & physical activity	Weight management	Medication (prescription only)	Medication (over the counter)							Yes	NHS (website)				Blogs		Charities (e.g., Versus Arthritis, Arthritis Action)			Agree	Agree	Disagree		Yes	Neither agree nor disagree	Agree	Agree	Strongly Agree	Neither agree nor disagree	Neither agree nor disagree	Strongly Agree	Neither agree nor disagree	Unlikely	Slightly interested	Not at all interested	Not at all interested	Neutral	Slightly interested	Very Likely	Neither likely nor unlikely	Likely	Neither likely nor unlikely	Neither likely nor unlikely	Likely	Yes, please explain
Yes		Yes- I know someone		Exercise & physical activity	Weight management	Medication (prescription only)		Physiotherapy	Nutrition as medicine (anti-inflammatory diet)					Yes	NHS (website)									Neither agree nor disagree	Neither agree nor disagree	Disagree		Yes	Agree	Agree	Neither agree nor disagree	Agree	Strongly Agree	Strongly Agree	Strongly Agree	Agree													No
Yes	Yes - myself					Medication (prescription only)		Physiotherapy				Surgery		Yes		NHS (doctor's advice)			Blogs	A dietitian/ nutritionist				Agree	Agree	Disagree		Yes	Agree	Agree	Disagree	Agree	Agree	Agree	Agree	Agree	Very likely	Slightly interested	Interested	Slightly interested	Not at all interested	Not at all interested	Unlikely	Likely	Unlikely	Neither likely nor unlikely	Unlikely	Unlikely	Yes, please explain
Yes			No	Exercise & physical activity	Weight management	Medication (prescription only)		Physiotherapy						No										Disagree	Disagree	Agree		No	Neither agree nor disagree	Strongly Agree	Strongly Agree	Strongly Agree	Strongly Agree	Strongly Agree	Strongly Agree	Neither agree nor disagree													Yes, please explain
Yes		Yes- I know someone		Exercise & physical activity	Weight management	Medication (prescription only)						Surgery		No										Disagree	Disagree	Disagree		Yes	Agree	Agree	Disagree	Agree	Agree	Strongly Agree	Strongly Agree	Disagree													No
Yes		Yes- I know someone				Medication (prescription only)		Physiotherapy						No										Disagree	Disagree	Stongly Disagree		Yes	Agree	Strongly Agree	Neither agree nor disagree	Agree	Agree	Strongly Agree	Neither agree nor disagree	Strongly Agree													No
Yes		Yes- I know someone		Exercise & physical activity	Weight management	Medication (prescription only)	Medication (over the counter)	Physiotherapy	Nutrition as medicine (anti-inflammatory diet)	Supplements (e.g., Chondroitin, Glucosamine)		Surgery		Yes	NHS (website)			Magazines (e.g., Women's/ Men's Health, Good Housekeeping)	Blogs		Charities (e.g., Versus Arthritis, Arthritis Action)			Strongly Agree	Strongly Agree	Strongly Agree		Yes	Strongly Agree	Strongly Agree	Agree	Agree	Strongly Agree	Strongly Agree	Strongly Agree	Agree													No
Yes		Yes- I know someone		Exercise & physical activity	Weight management	Medication (prescription only)	Medication (over the counter)	Physiotherapy	Nutrition as medicine (anti-inflammatory diet)	Supplements (e.g., Chondroitin, Glucosamine)		Surgery		No										Agree	Disagree	Disagree		Yes	Agree	Agree	Agree	Agree	Agree	Agree	Agree	Agree													No
Yes	Yes - myself	Yes- I know someone		Exercise & physical activity	Weight management		Medication (over the counter)	Physiotherapy		Supplements (e.g., Chondroitin, Glucosamine)		Surgery		No										Disagree	Disagree	Disagree		No	Neither agree nor disagree	Agree	Disagree	Agree	Neither agree nor disagree	Agree	Agree	Neither agree nor disagree	Unlikely	Interested	Neutral	Neutral	Interested	Interested	Likely	Very Likely	Unlikely	Unlikely	Unlikely	Very Likely	No
Yes	Yes - myself			Exercise & physical activity	Weight management	Medication (prescription only)	Medication (over the counter)							No										Agree	Agree	Neither agree nor disagree		Yes	Agree	Agree	Disagree	Agree	Agree	Agree	Agree	Neither agree nor disagree	Neutral	Neutral	Neutral	Interested	Interested	Neutral	Very Likely	Neither likely nor unlikely	Unlikely	Neither likely nor unlikely	Neither likely nor unlikely	Neither likely nor unlikely	No
Yes			No	Exercise & physical activity	Weight management	Medication (prescription only)			Nutrition as medicine (anti-inflammatory diet)					No										Neither agree nor disagree	Disagree	Disagree		Yes	Agree	Agree	Agree	Agree	Agree	Agree	Agree	Neither agree nor disagree													Yes, please explain
Yes			No	Exercise & physical activity	Weight management	Medication (prescription only)		Physiotherapy		Supplements (e.g., Chondroitin, Glucosamine)		Surgery		No										Disagree	Disagree	Disagree		Yes	Agree	Agree	Strongly Agree	Agree	Agree	Agree	Strongly Agree	Strongly Agree													No
Yes		Yes- I know someone		Exercise & physical activity	Weight management	Medication (prescription only)	Medication (over the counter)	Physiotherapy	Nutrition as medicine (anti-inflammatory diet)	Supplements (e.g., Chondroitin, Glucosamine)	Herbs	Surgery		Yes	NHS (website)		BBC Food (website)							Agree	Neither agree nor disagree	Agree		Yes	Agree	Strongly Agree	Agree	Agree	Strongly Agree	Agree	Agree	Neither agree nor disagree													No
Yes	Yes - myself			Exercise & physical activity	Weight management	Medication (prescription only)	Medication (over the counter)	Physiotherapy	Nutrition as medicine (anti-inflammatory diet)	Supplements (e.g., Chondroitin, Glucosamine)	Herbs	Surgery		No										Agree	Neither agree nor disagree	Agree		Yes	Strongly Agree	Agree	Strongly Agree	Agree	Agree	Agree	Agree	Agree	Neutral	Interested	Interested	Interested	Interested	Neutral	Unlikely	Unlikely	Unlikely	Unlikely	Unlikely	Unlikely	No
Yes			No	Exercise & physical activity	Weight management				Nutrition as medicine (anti-inflammatory diet)	Supplements (e.g., Chondroitin, Glucosamine)				Yes	NHS (website)				Blogs			Other	Google	Disagree	Disagree	Disagree		Yes	Strongly Agree	Strongly Agree	Agree	Disagree	Strongly Agree	Agree	Strongly Agree	Agree													No
Yes		Yes- I know someone		Exercise & physical activity	Weight management	Medication (prescription only)	Medication (over the counter)	Physiotherapy		Supplements (e.g., Chondroitin, Glucosamine)		Surgery		No										Disagree	Agree	Neither agree nor disagree		Yes	Strongly Agree	Agree	Agree	Agree	Strongly Agree	Strongly Agree	Strongly Agree	Neither agree nor disagree													Yes, please explain
Yes	Yes - myself	Yes- I know someone		Exercise & physical activity	Weight management	Medication (prescription only)	Medication (over the counter)	Physiotherapy	Nutrition as medicine (anti-inflammatory diet)	Supplements (e.g., Chondroitin, Glucosamine)		Surgery		Yes	NHS (website)	NHS (doctor's advice)				A dietitian/ nutritionist				Neither agree nor disagree	Disagree	Agree		Yes	Strongly Agree	Neither agree nor disagree	Strongly Agree	Agree	Agree	Neither agree nor disagree	Strongly Agree	Strongly Agree	Neutral	Neutral	Interested	Neutral	Very interested	Slightly interested	Very Likely	Likely	Unlikely	Neither likely nor unlikely	Very Unlikely	Very Likely	Yes, please explain
Yes	Yes - myself			Exercise & physical activity	Weight management			Physiotherapy	Nutrition as medicine (anti-inflammatory diet)					Yes		NHS (doctor's advice)								Agree	Disagree	Neither agree nor disagree		No	Agree	Agree	Disagree	Agree	Neither agree nor disagree	Agree	Agree	Agree	Neutral	Not at all interested	Not at all interested	Not at all interested	Not at all interested	Not at all interested	Unlikely	Neither likely nor unlikely	Unlikely	Unlikely	Very Unlikely	Neither likely nor unlikely	No
Yes		Yes- I know someone		Exercise & physical activity	Weight management	Medication (prescription only)	Medication (over the counter)	Physiotherapy	Nutrition as medicine (anti-inflammatory diet)			Surgery		Yes	NHS (website)			Magazines (e.g., Women's/ Men's Health, Good Housekeeping)						Agree	Agree	Agree		Yes	Strongly Agree	Strongly Agree	Disagree	Agree	Neither agree nor disagree	Agree	Neither agree nor disagree	Neither agree nor disagree													Yes, please explain
Yes		Yes- I know someone				Medication (prescription only)		Physiotherapy		Supplements (e.g., Chondroitin, Glucosamine)				No										Agree	Disagree	Agree		Yes	Agree	Agree	Agree	Neither agree nor disagree	Agree	Strongly Agree	Agree	Agree													No
Yes	Yes - myself	Yes- I know someone		Exercise & physical activity	Weight management	Medication (prescription only)	Medication (over the counter)	Physiotherapy	Nutrition as medicine (anti-inflammatory diet)	Supplements (e.g., Chondroitin, Glucosamine)	Herbs	Surgery		Yes								Other	Internet Research	Agree	Agree	Agree		Yes	Agree	Agree	Disagree	Disagree	Strongly Agree	Agree	Agree	Agree	Very likely	Neutral	Not at all interested	Neutral	Neutral	Not at all interested	Unlikely	Unlikely	Unlikely	Unlikely	Very Unlikely	Very Unlikely	No
Yes		Yes- I know someone		Exercise & physical activity		Medication (prescription only)	Medication (over the counter)	Physiotherapy		Supplements (e.g., Chondroitin, Glucosamine)		Surgery		No										Stongly Disagree	Stongly Disagree	Stongly Disagree		Yes	Agree	Agree	Agree	Agree	Neither agree nor disagree	Agree	Agree	Agree													No
Yes	Yes - myself	Yes- I know someone		Exercise & physical activity	Weight management	Medication (prescription only)	Medication (over the counter)	Physiotherapy	Nutrition as medicine (anti-inflammatory diet)	Supplements (e.g., Chondroitin, Glucosamine)	Herbs	Surgery		Yes					Blogs					Agree	Agree	Neither agree nor disagree		Yes	Strongly Agree	Strongly Agree	Neither agree nor disagree	Agree	Agree	Agree	Strongly Agree	Agree	Neutral	Interested	Interested	Interested	Interested	Not at all interested	Neither likely nor unlikely	Neither likely nor unlikely	Unlikely	Unlikely	Unlikely	Neither likely nor unlikely	No
Yes		Yes- I know someone		Exercise & physical activity	Weight management		Medication (over the counter)	Physiotherapy						No										Disagree	Agree	Disagree		No	Agree	Agree	Agree	Agree	Agree	Agree	Agree	Agree													No
Yes		Yes- I know someone				Medication (prescription only)				Supplements (e.g., Chondroitin, Glucosamine)				No										Agree	Neither agree nor disagree	Disagree		No	Agree	Agree	Agree	Agree	Agree	Agree	Agree	Agree													No
Yes	Yes - myself			Exercise & physical activity	Weight management	Medication (prescription only)	Medication (over the counter)	Physiotherapy	Nutrition as medicine (anti-inflammatory diet)	Supplements (e.g., Chondroitin, Glucosamine)		Surgery		Yes							Charities (e.g., Versus Arthritis, Arthritis Action)			Agree	Disagree	Neither agree nor disagree		Yes	Agree	Agree	Agree	Agree	Agree	Agree	Agree	Agree	Likely	Interested	Interested	Interested	Interested	Neutral	Likely	Likely	Unlikely	Unlikely	Unlikely	Likely	No
Yes		Yes- I know someone		Exercise & physical activity	Weight management					Supplements (e.g., Chondroitin, Glucosamine)				Yes	NHS (website)									Disagree	Disagree	Disagree		No	Agree	Strongly Agree	Agree	Agree	Strongly Agree	Agree	Agree	Neither agree nor disagree													No
Yes		Yes- I know someone		Exercise & physical activity	Weight management	Medication (prescription only)	Medication (over the counter)							No										Disagree	Disagree	Disagree		Yes	Agree	Strongly Agree	Agree	Agree	Agree	Agree	Agree	Agree													No
Yes		Yes- I know someone		Exercise & physical activity	Weight management	Medication (prescription only)		Physiotherapy		Supplements (e.g., Chondroitin, Glucosamine)				Yes	NHS (website)		BBC Food (website)	Magazines (e.g., Women's/ Men's Health, Good Housekeeping)						Disagree	Disagree	Disagree		Yes	Strongly Agree	Strongly Agree	Strongly Agree	Strongly Agree	Strongly Agree	Strongly Agree	Strongly Agree	Strongly Agree													No
Yes		Yes- I know someone		Exercise & physical activity		Medication (prescription only)			Nutrition as medicine (anti-inflammatory diet)	Supplements (e.g., Chondroitin, Glucosamine)		Surgery		No										Disagree	Disagree	Disagree		Yes	Agree	Agree	Agree	Neither agree nor disagree	Agree	Agree	Strongly Agree	Neither agree nor disagree													Yes, please explain
Yes		Yes- I know someone		Exercise & physical activity	Weight management	Medication (prescription only)		Physiotherapy	Nutrition as medicine (anti-inflammatory diet)			Surgery		Yes	NHS (website)	NHS (doctor's advice)						Other	Google	Agree	Agree	Neither agree nor disagree		No	Neither agree nor disagree	Disagree	Neither agree nor disagree	Stongly Disagree	Stongly Disagree	Neither agree nor disagree	Strongly Agree	Disagree													Yes, please explain
Yes		Yes- I know someone		Exercise & physical activity		Medication (prescription only)			Nutrition as medicine (anti-inflammatory diet)	Supplements (e.g., Chondroitin, Glucosamine)				No										Neither agree nor disagree	Agree	Neither agree nor disagree		Yes	Agree	Agree	Neither agree nor disagree	Disagree	Agree	Agree	Neither agree nor disagree	Disagree													Yes, please explain
Yes		Yes- I know someone				Medication (prescription only)		Physiotherapy						No										Disagree	Disagree	Stongly Disagree		Yes	Strongly Agree	Strongly Agree	Strongly Agree	Agree	Agree	Strongly Agree	Strongly Agree	Strongly Agree													No
Yes		Yes- I know someone		Exercise & physical activity	Weight management	Medication (prescription only)	Medication (over the counter)	Physiotherapy	Nutrition as medicine (anti-inflammatory diet)	Supplements (e.g., Chondroitin, Glucosamine)		Surgery		No										Stongly Disagree	Disagree	Disagree		Yes	Strongly Agree	Strongly Agree	Agree	Agree	Strongly Agree	Strongly Agree	Strongly Agree	Neither agree nor disagree													No
Yes		Yes- I know someone		Exercise & physical activity	Weight management	Medication (prescription only)	Medication (over the counter)	Physiotherapy	Nutrition as medicine (anti-inflammatory diet)	Supplements (e.g., Chondroitin, Glucosamine)	Herbs	Surgery		Yes						A dietitian/ nutritionist				Agree	Agree	Agree		Yes	Strongly Agree	Strongly Agree	Neither agree nor disagree	Neither agree nor disagree	Strongly Agree	Strongly Agree	Neither agree nor disagree	Neither agree nor disagree													No
Yes		Yes- I know someone		Exercise & physical activity	Weight management	Medication (prescription only)		Physiotherapy	Nutrition as medicine (anti-inflammatory diet)	Supplements (e.g., Chondroitin, Glucosamine)				No										Agree	Agree	Agree		No	Agree	Agree	Agree	Agree	Agree	Agree	Agree	Neither agree nor disagree													No
Yes	Yes - myself			Exercise & physical activity	Weight management	Medication (prescription only)		Physiotherapy		Supplements (e.g., Chondroitin, Glucosamine)		Surgery		No										Neither agree nor disagree	Neither agree nor disagree	Disagree		Yes	Neither agree nor disagree	Agree	Agree	Agree	Agree	Neither agree nor disagree	Agree	Agree	Unlikely	Neutral	Neutral	Neutral	Interested	Neutral	Likely	Likely	Likely	Likely	Very Unlikely	Likely	No
Yes	Yes - myself			Exercise & physical activity	Weight management	Medication (prescription only)	Medication (over the counter)	Physiotherapy	Nutrition as medicine (anti-inflammatory diet)	Supplements (e.g., Chondroitin, Glucosamine)	Herbs	Surgery		No										Strongly Agree	Agree	Stongly Disagree		Yes	Strongly Agree	Strongly Agree	Strongly Agree	Strongly Agree	Strongly Agree	Strongly Agree	Strongly Agree	Stongly Disagree	Likely	Very interested	Very interested	Very interested	Very interested	Very interested	Very Likely	Very Likely	Very Unlikely	Very Unlikely	Very Unlikely	Very Likely	No
Yes			No	Exercise & physical activity		Medication (prescription only)			Nutrition as medicine (anti-inflammatory diet)			Surgery		Yes	NHS (website)						Charities (e.g., Versus Arthritis, Arthritis Action)			Disagree	Disagree	Disagree		Yes	Agree	Agree	Agree	Disagree	Disagree	Agree	Agree	Disagree													No
Yes	Yes - myself			Exercise & physical activity	Weight management	Medication (prescription only)	Medication (over the counter)	Physiotherapy						No										Disagree	Disagree	Disagree		Yes	Agree	Agree	Neither agree nor disagree	Agree	Agree	Agree	Agree	Disagree	Very unlikely	Slightly interested	Slightly interested	Interested	Interested	Neutral	Likely	Likely	Neither likely nor unlikely	Likely	Likely	Unlikely	No
Yes		Yes- I know someone		Exercise & physical activity	Weight management	Medication (prescription only)	Medication (over the counter)	Physiotherapy	Nutrition as medicine (anti-inflammatory diet)		Herbs	Surgery		Yes	NHS (website)			Magazines (e.g., Women's/ Men's Health, Good Housekeeping)	Blogs	A dietitian/ nutritionist				Agree	Agree	Agree		Yes	Strongly Agree	Strongly Agree	Neither agree nor disagree	Neither agree nor disagree	Strongly Agree	Strongly Agree	Agree	Neither agree nor disagree													No
Yes	Yes - myself			Exercise & physical activity	Weight management	Medication (prescription only)	Medication (over the counter)	Physiotherapy	Nutrition as medicine (anti-inflammatory diet)	Supplements (e.g., Chondroitin, Glucosamine)		Surgery		No										Neither agree nor disagree	Disagree	Neither agree nor disagree		Yes	Strongly Agree	Strongly Agree	Strongly Agree	Agree	Agree	Agree	Neither agree nor disagree	Agree	Unlikely	Neutral	Neutral	Neutral	Very interested	Slightly interested	Likely	Likely	Unlikely	Neither likely nor unlikely	Very Unlikely	Unlikely	Yes, please explain
Yes			No	Exercise & physical activity	Weight management			Physiotherapy						No										Neither agree nor disagree	Neither agree nor disagree	Stongly Disagree		Yes	Agree	Agree	Agree	Neither agree nor disagree	Agree	Agree	Agree	Neither agree nor disagree													No
Yes	Yes - myself				Weight management			Physiotherapy						No										Agree	Neither agree nor disagree	Agree		Yes	Neither agree nor disagree	Disagree	Neither agree nor disagree	Agree	Agree	Strongly Agree	Agree	Neither agree nor disagree	Unlikely	Interested	Neutral	Neutral	Neutral	Interested	Very Likely	Likely	Neither likely nor unlikely	Likely	Very Likely	Unlikely	No
Yes		Yes- I know someone		Exercise & physical activity	Weight management	Medication (prescription only)								No										Disagree	Disagree	Agree		No	Neither agree nor disagree	Neither agree nor disagree	Neither agree nor disagree	Neither agree nor disagree	Neither agree nor disagree	Neither agree nor disagree	Neither agree nor disagree	Neither agree nor disagree													No
Yes		Yes- I know someone			Weight management	Medication (prescription only)		Physiotherapy	Nutrition as medicine (anti-inflammatory diet)	Supplements (e.g., Chondroitin, Glucosamine)	Herbs	Surgery		No										Disagree	Disagree	Agree		Yes	Strongly Agree	Strongly Agree	Agree	Agree	Agree	Strongly Agree	Agree	Agree													No
Yes		Yes- I know someone		Exercise & physical activity	Weight management			Physiotherapy	Nutrition as medicine (anti-inflammatory diet)	Supplements (e.g., Chondroitin, Glucosamine)				Yes	NHS (website)									Agree	Agree	Neither agree nor disagree		Yes	Agree	Agree	Agree	Disagree	Agree	Agree	Agree	Disagree													No
Yes	Yes - myself			Exercise & physical activity	Weight management		Medication (over the counter)	Physiotherapy	Nutrition as medicine (anti-inflammatory diet)	Supplements (e.g., Chondroitin, Glucosamine)		Surgery		Yes	NHS (website)						Charities (e.g., Versus Arthritis, Arthritis Action)	Other	online browsing	Agree	Agree	Agree		Yes	Agree	Agree	Neither agree nor disagree	Neither agree nor disagree	Agree	Disagree	Agree	Strongly Agree	Neutral	Interested	Not at all interested	Slightly interested	Interested	Not at all interested	Unlikely	Neither likely nor unlikely	Unlikely	Likely	Very Unlikely	Neither likely nor unlikely	No
Yes		Yes- I know someone		Exercise & physical activity	Weight management	Medication (prescription only)	Medication (over the counter)	Physiotherapy	Nutrition as medicine (anti-inflammatory diet)					Yes	NHS (website)			Magazines (e.g., Women's/ Men's Health, Good Housekeeping)						Disagree	Disagree	Agree		Yes	Strongly Agree	Strongly Agree	Agree	Strongly Agree	Strongly Agree	Strongly Agree	Strongly Agree	Neither agree nor disagree													Yes, please explain
Yes	Yes - myself			Exercise & physical activity	Weight management	Medication (prescription only)	Medication (over the counter)	Physiotherapy						No										Disagree	Disagree	Disagree		Yes	Strongly Agree	Strongly Agree	Strongly Agree	Strongly Agree	Strongly Agree	Strongly Agree	Strongly Agree	Strongly Agree	Neutral	Interested	Interested	Interested	Interested	Interested	Unlikely	Likely	Unlikely	Neither likely nor unlikely	Very Unlikely	Likely	No
Yes	Yes - myself			Exercise & physical activity	Weight management	Medication (prescription only)	Medication (over the counter)	Physiotherapy		Supplements (e.g., Chondroitin, Glucosamine)		Surgery		No										Neither agree nor disagree	Disagree	Stongly Disagree		No	Neither agree nor disagree	Neither agree nor disagree	Neither agree nor disagree	Strongly Agree	Agree	Agree	Strongly Agree	Neither agree nor disagree	Very unlikely	Neutral	Neutral	Neutral	Not at all interested	Not at all interested	Very Likely	Likely	Very Likely	Unlikely	Unlikely	Very Likely	Yes, please explain
Yes			No	Exercise & physical activity	Weight management									No										Disagree	Disagree	Stongly Disagree		Yes	Strongly Agree	Strongly Agree	Agree	Agree	Neither agree nor disagree	Strongly Agree	Agree	Agree													No
Yes			No										None of the above	No										Neither agree nor disagree	Neither agree nor disagree	Agree		Yes	Agree	Agree	Disagree	Disagree	Agree	Agree	Disagree	Stongly Disagree													No
Yes		Yes- I know someone		Exercise & physical activity	Weight management	Medication (prescription only)	Medication (over the counter)	Physiotherapy		Supplements (e.g., Chondroitin, Glucosamine)		Surgery		No										Neither agree nor disagree	Neither agree nor disagree	Neither agree nor disagree		No	Disagree	Disagree	Disagree	Disagree	Neither agree nor disagree	Neither agree nor disagree	Neither agree nor disagree	Neither agree nor disagree													No
Yes		Yes- I know someone		Exercise & physical activity	Weight management	Medication (prescription only)	Medication (over the counter)	Physiotherapy	Nutrition as medicine (anti-inflammatory diet)	Supplements (e.g., Chondroitin, Glucosamine)		Surgery		Yes	NHS (website)	NHS (doctor's advice)								Agree	Agree	Neither agree nor disagree		Yes	Agree	Agree	Agree	Agree	Agree	Agree	Agree	Agree													No
Yes		Yes- I know someone				Medication (prescription only)								No										Stongly Disagree	Stongly Disagree	Stongly Disagree		Yes	Strongly Agree	Strongly Agree	Agree	Agree	Strongly Agree	Strongly Agree	Strongly Agree	Strongly Agree													No
Yes		Yes- I know someone		Exercise & physical activity	Weight management	Medication (prescription only)								No										Stongly Disagree	Stongly Disagree	Stongly Disagree		Yes	Strongly Agree	Strongly Agree	Agree	Neither agree nor disagree	Agree	Neither agree nor disagree	Agree	Neither agree nor disagree													No
Yes	Yes - myself				Weight management	Medication (prescription only)		Physiotherapy	Nutrition as medicine (anti-inflammatory diet)					Yes			BBC Food (website)		Blogs					Agree	Agree	Agree		Yes	Strongly Agree	Strongly Agree	Neither agree nor disagree	Agree	Strongly Agree	Agree	Agree	Neither agree nor disagree	Likely	Neutral	Interested	Neutral	Not at all interested	Not at all interested	Likely	Unlikely	Unlikely	Very Likely	Unlikely	Very Likely	No
Yes	Yes - myself	Yes- I know someone		Exercise & physical activity	Weight management	Medication (prescription only)		Physiotherapy		Supplements (e.g., Chondroitin, Glucosamine)		Surgery		No										Disagree	Disagree	Disagree		Yes	Agree	Strongly Agree	Agree	Strongly Agree	Strongly Agree	Strongly Agree	Strongly Agree	Strongly Agree	Very unlikely	Neutral	Neutral	Neutral	Neutral	Neutral	Likely	Very Likely	Unlikely	Neither likely nor unlikely	Neither likely nor unlikely	Likely	Yes, please explain
Yes		Yes- I know someone		Exercise & physical activity		Medication (prescription only)	Medication (over the counter)	Physiotherapy						No										Disagree	Neither agree nor disagree	Disagree		Yes	Agree	Agree	Agree	Agree	Neither agree nor disagree	Agree	Neither agree nor disagree	Agree													No
Yes	Yes - myself			Exercise & physical activity	Weight management	Medication (prescription only)		Physiotherapy				Surgery		No										Stongly Disagree	Disagree	Disagree		Yes	Strongly Agree	Strongly Agree	Strongly Agree	Neither agree nor disagree	Agree	Strongly Agree	Strongly Agree	Strongly Agree	Very unlikely	Very interested	Interested	Very interested	Very interested	Interested	Very Unlikely	Very Likely	Unlikely	Very Unlikely	Very Unlikely	Unlikely	Yes, please explain
Yes		Yes- I know someone		Exercise & physical activity	Weight management	Medication (prescription only)	Medication (over the counter)							No										Strongly Agree	Disagree	Strongly Agree		Yes	Strongly Agree	Strongly Agree	Neither agree nor disagree	Neither agree nor disagree	Strongly Agree	Strongly Agree	Neither agree nor disagree	Neither agree nor disagree													No
Yes	Yes - myself			Exercise & physical activity	Weight management	Medication (prescription only)	Medication (over the counter)	Physiotherapy				Surgery		No										Disagree	Neither agree nor disagree	Disagree		Yes	Agree	Agree	Neither agree nor disagree	Agree	Agree	Agree	Neither agree nor disagree	Neither agree nor disagree	Unlikely	Interested	Neutral	Neutral	Neutral	Slightly interested	Likely	Likely	Neither likely nor unlikely	Unlikely	Very Unlikely	Unlikely	Yes, please explain
Yes	Yes - myself	Yes- I know someone		Exercise & physical activity	Weight management		Medication (over the counter)	Physiotherapy	Nutrition as medicine (anti-inflammatory diet)	Supplements (e.g., Chondroitin, Glucosamine)		Surgery		No										Disagree	Disagree	Disagree		Yes	Agree	Agree	Agree	Agree	Agree	Agree	Agree	Neither agree nor disagree	Neutral	Neutral	Slightly interested	Slightly interested	Interested	Slightly interested	Likely	Very Likely	Unlikely	Unlikely	Unlikely	Likely	No
Yes		Yes- I know someone		Exercise & physical activity	Weight management				Nutrition as medicine (anti-inflammatory diet)	Supplements (e.g., Chondroitin, Glucosamine)		Surgery		Yes							Charities (e.g., Versus Arthritis, Arthritis Action)			Agree	Agree	Agree		Yes	Strongly Agree	Strongly Agree	Strongly Agree	Strongly Agree	Strongly Agree	Neither agree nor disagree	Strongly Agree	Strongly Agree													No
Yes		Yes- I know someone		Exercise & physical activity	Weight management	Medication (prescription only)						Surgery		No										Disagree	Disagree	Disagree		Yes	Agree	Agree	Strongly Agree	Agree	Strongly Agree	Strongly Agree	Agree	Agree													Yes, please explain
Yes	Yes - myself				Weight management	Medication (prescription only)	Medication (over the counter)		Nutrition as medicine (anti-inflammatory diet)	Supplements (e.g., Chondroitin, Glucosamine)				Yes	NHS (website)									Agree	Agree	Neither agree nor disagree		Yes	Agree	Agree	Agree	Agree	Agree	Agree	Agree	Disagree	Neutral	Neutral	Neutral	Neutral	Neutral	Neutral	Unlikely	Likely	Unlikely	Unlikely	Neither likely nor unlikely	Neither likely nor unlikely	No
Yes			No	Exercise & physical activity	Weight management			Physiotherapy	Nutrition as medicine (anti-inflammatory diet)			Surgery		No										Disagree	Neither agree nor disagree	Neither agree nor disagree		Yes	Agree	Strongly Agree	Agree	Agree	Neither agree nor disagree	Agree	Agree	Agree													Yes, please explain
Yes			No										None of the above	No										Stongly Disagree	Stongly Disagree	Stongly Disagree		No	Agree	Agree	Agree	Agree	Agree	Agree	Agree	Agree													No
Yes	Yes - myself					Medication (prescription only)								Yes	NHS (website)									Neither agree nor disagree	Neither agree nor disagree	Neither agree nor disagree		Yes	Neither agree nor disagree	Neither agree nor disagree	Agree	Neither agree nor disagree	Neither agree nor disagree	Neither agree nor disagree	Neither agree nor disagree	Stongly Disagree	Neutral	Not at all interested	Not at all interested	Not at all interested	Not at all interested	Not at all interested	Unlikely	Unlikely	Unlikely	Unlikely	Very Unlikely	Unlikely	No
Yes	Yes - myself			Exercise & physical activity	Weight management	Medication (prescription only)	Medication (over the counter)	Physiotherapy	Nutrition as medicine (anti-inflammatory diet)	Supplements (e.g., Chondroitin, Glucosamine)		Surgery		Yes	NHS (website)	NHS (doctor's advice)					Charities (e.g., Versus Arthritis, Arthritis Action)			Agree	Agree	Agree		Yes	Neither agree nor disagree	Agree	Agree	Agree	Agree	Strongly Agree	Agree	Strongly Agree	Neutral	Interested	Interested	Interested	Neutral	Neutral	Likely	Unlikely	Very Unlikely	Very Unlikely	Likely	Neither likely nor unlikely	No
Yes	Yes - myself			Exercise & physical activity	Weight management		Medication (over the counter)	Physiotherapy	Nutrition as medicine (anti-inflammatory diet)	Supplements (e.g., Chondroitin, Glucosamine)		Surgery		Yes								Other	Online google search	Agree	Agree	Neither agree nor disagree		Yes	Strongly Agree	Strongly Agree	Stongly Disagree	Disagree	Agree	Strongly Agree	Strongly Agree	Neither agree nor disagree	Neutral	Very interested	Very interested	Neutral	Interested	Not at all interested	Very Unlikely	Unlikely	Very Unlikely	Very Unlikely	Very Unlikely	Very Unlikely	No
Yes	Yes - myself			Exercise & physical activity	Weight management	Medication (prescription only)			Nutrition as medicine (anti-inflammatory diet)	Supplements (e.g., Chondroitin, Glucosamine)		Surgery		Yes	NHS (website)				Blogs		Charities (e.g., Versus Arthritis, Arthritis Action)			Disagree	Disagree	Disagree		Yes	Agree	Agree	Agree	Agree	Agree	Agree	Agree	Agree	Neutral	Interested	Interested	Interested	Neutral	Interested	Likely	Likely	Unlikely	Likely	Neither likely nor unlikely	Likely	Yes, please explain
Yes	Yes - myself	Yes- I know someone			Weight management	Medication (prescription only)	Medication (over the counter)	Physiotherapy	Nutrition as medicine (anti-inflammatory diet)			Surgery		Yes	NHS (website)	NHS (doctor's advice)		Magazines (e.g., Women's/ Men's Health, Good Housekeeping)		A dietitian/ nutritionist	Charities (e.g., Versus Arthritis, Arthritis Action)			Agree	Agree	Agree		Yes	Strongly Agree	Neither agree nor disagree	Strongly Agree	Agree	Neither agree nor disagree	Strongly Agree	Agree	Disagree	Likely	Very interested	Interested	Very interested	Very interested	Interested	Unlikely	Likely	Very Likely	Likely	Unlikely	Very Likely	Yes, please explain
Yes		Yes- I know someone				Medication (prescription only)						Surgery		No										Stongly Disagree	Stongly Disagree	Stongly Disagree		No	Strongly Agree	Strongly Agree	Agree	Neither agree nor disagree	Neither agree nor disagree	Strongly Agree	Agree	Neither agree nor disagree													Yes, please explain
Yes		Yes- I know someone			Weight management	Medication (prescription only)	Medication (over the counter)	Physiotherapy	Nutrition as medicine (anti-inflammatory diet)	Supplements (e.g., Chondroitin, Glucosamine)		Surgery		Yes	NHS (website)			Magazines (e.g., Women's/ Men's Health, Good Housekeeping)						Agree	Agree	Agree		Yes	Agree	Neither agree nor disagree	Agree	Agree	Agree	Agree	Agree	Disagree													Yes, please explain
Yes		Yes- I know someone		Exercise & physical activity	Weight management	Medication (prescription only)	Medication (over the counter)			Supplements (e.g., Chondroitin, Glucosamine)		Surgery		Yes	NHS (website)									Disagree	Disagree	Disagree		Yes	Agree	Agree	Agree	Agree	Agree	Agree	Agree	Agree													No
Yes	Yes - myself			Exercise & physical activity	Weight management	Medication (prescription only)		Physiotherapy		Supplements (e.g., Chondroitin, Glucosamine)		Surgery		No										Disagree	Disagree	Disagree		Yes	Agree	Agree	Disagree	Disagree	Agree	Agree	Neither agree nor disagree	Neither agree nor disagree	Unlikely	Not at all interested	Not at all interested	Not at all interested	Interested	Not at all interested	Very Unlikely	Likely	Very Unlikely	Very Unlikely	Very Unlikely	Very Unlikely	No
Yes		Yes- I know someone						Physiotherapy		Supplements (e.g., Chondroitin, Glucosamine)				No										Disagree	Stongly Disagree	Agree		Yes	Strongly Agree	Strongly Agree	Stongly Disagree	Agree	Strongly Agree	Strongly Agree	Agree	Neither agree nor disagree													No
Yes	Yes - myself												None of the above	No										Disagree	Neither agree nor disagree	Stongly Disagree		No	Agree	Agree	Agree	Agree	Strongly Agree	Agree	Agree	Neither agree nor disagree	Very unlikely	Not at all interested	Neutral	Neutral	Slightly interested	Not at all interested	Very Likely	Likely	Likely	Very Likely	Neither likely nor unlikely	Very Likely	No
Yes			No	Exercise & physical activity	Weight management	Medication (prescription only)	Medication (over the counter)							No										Neither agree nor disagree	Neither agree nor disagree	Neither agree nor disagree		Yes	Agree	Agree	Agree	Agree	Agree	Agree	Agree	Neither agree nor disagree													No
Yes	Yes - myself	Yes- I know someone		Exercise & physical activity	Weight management	Medication (prescription only)	Medication (over the counter)	Physiotherapy	Nutrition as medicine (anti-inflammatory diet)	Supplements (e.g., Chondroitin, Glucosamine)	Herbs	Surgery		Yes	NHS (website)	NHS (doctor's advice)			Blogs	A dietitian/ nutritionist	Charities (e.g., Versus Arthritis, Arthritis Action)			Agree	Agree	Agree		Yes	Strongly Agree	Strongly Agree	Strongly Agree	Strongly Agree	Strongly Agree	Strongly Agree	Strongly Agree	Strongly Agree	Very likely	Very interested	Very interested	Very interested	Very interested	Very interested	Likely	Likely	Very Unlikely	Neither likely nor unlikely	Unlikely	Very Likely	No
Yes	Yes - myself			Exercise & physical activity	Weight management	Medication (prescription only)	Medication (over the counter)	Physiotherapy	Nutrition as medicine (anti-inflammatory diet)	Supplements (e.g., Chondroitin, Glucosamine)				Yes	NHS (website)		BBC Food (website)							Agree	Agree	Neither agree nor disagree		Yes	Agree	Strongly Agree	Neither agree nor disagree	Neither agree nor disagree	Strongly Agree	Strongly Agree	Strongly Agree	Neither agree nor disagree	Likely	Not at all interested	Not at all interested	Not at all interested	Not at all interested	Not at all interested	Likely	Likely	Unlikely	Likely	Very Likely	Very Likely	No
Yes		Yes- I know someone		Exercise & physical activity	Weight management				Nutrition as medicine (anti-inflammatory diet)		Herbs			Yes	NHS (website)						Charities (e.g., Versus Arthritis, Arthritis Action)			Agree	Agree	Agree		Yes	Agree	Agree	Disagree	Neither agree nor disagree	Agree	Agree	Agree	Neither agree nor disagree													Yes, please explain
Yes	Yes - myself			Exercise & physical activity						Supplements (e.g., Chondroitin, Glucosamine)				No										Neither agree nor disagree	Disagree	Neither agree nor disagree		Yes	Agree	Neither agree nor disagree	Disagree	Disagree	Agree	Agree	Neither agree nor disagree	Disagree	Unlikely	Neutral	Slightly interested	Slightly interested	Neutral	Not at all interested	Likely	Likely	Unlikely	Neither likely nor unlikely	Unlikely	Neither likely nor unlikely	No
Yes		Yes- I know someone		Exercise & physical activity	Weight management	Medication (prescription only)		Physiotherapy						No										Disagree	Disagree	Stongly Disagree		Yes	Agree	Agree	Agree	Disagree	Neither agree nor disagree	Agree	Agree	Agree													Yes, please explain
Yes	Yes - myself	Yes- I know someone		Exercise & physical activity	Weight management	Medication (prescription only)		Physiotherapy	Nutrition as medicine (anti-inflammatory diet)	Supplements (e.g., Chondroitin, Glucosamine)		Surgery		Yes	NHS (website)	NHS (doctor's advice)	BBC Food (website)			A dietitian/ nutritionist				Agree	Agree	Neither agree nor disagree		Yes	Strongly Agree	Agree	Agree	Stongly Disagree	Strongly Agree	Strongly Agree	Strongly Agree	Strongly Agree	Likely	Interested	Interested	Neutral	Neutral	Interested	Unlikely	Very Likely	Likely	Likely	Unlikely	Very Likely	No
Yes		Yes- I know someone		Exercise & physical activity						Supplements (e.g., Chondroitin, Glucosamine)		Surgery		No										Disagree	Disagree	Disagree		No	Agree	Agree	Agree	Agree	Agree	Agree	Agree	Agree													Yes, please explain
Yes	Yes - myself	Yes- I know someone			Weight management	Medication (prescription only)		Physiotherapy		Supplements (e.g., Chondroitin, Glucosamine)		Surgery		No										Disagree	Disagree	Disagree		Yes	Agree	Neither agree nor disagree	Neither agree nor disagree	Agree	Agree	Agree	Agree	Neither agree nor disagree	Unlikely	Very interested	Interested	Interested	Very interested	Slightly interested	Very Likely	Very Likely	Neither likely nor unlikely	Likely	Very Unlikely	Very Likely	Yes, please explain
Yes	Yes - myself	Yes- I know someone		Exercise & physical activity		Medication (prescription only)		Physiotherapy				Surgery		No										Agree	Disagree	Agree		Yes	Agree	Disagree	Agree	Disagree	Disagree	Agree	Agree	Strongly Agree	Very unlikely	Interested	Interested	Interested	Very interested	Neutral	Neither likely nor unlikely	Neither likely nor unlikely	Very Unlikely	Unlikely	Unlikely	Unlikely	Yes, please explain
Yes		Yes- I know someone		Exercise & physical activity	Weight management	Medication (prescription only)	Medication (over the counter)	Physiotherapy	Nutrition as medicine (anti-inflammatory diet)	Supplements (e.g., Chondroitin, Glucosamine)				No										Neither agree nor disagree	Neither agree nor disagree	Disagree		Yes	Agree	Agree	Agree	Agree	Agree	Agree	Agree	Agree													Yes, please explain
Yes		Yes- I know someone	No	Exercise & physical activity		Medication (prescription only)				Supplements (e.g., Chondroitin, Glucosamine)				Yes	NHS (website)				Blogs	A dietitian/ nutritionist				Agree	Agree	Neither agree nor disagree		Yes	Strongly Agree	Strongly Agree	Neither agree nor disagree	Agree	Strongly Agree	Strongly Agree	Strongly Agree	Agree													No
Yes	Yes - myself	Yes- I know someone		Exercise & physical activity	Weight management	Medication (prescription only)	Medication (over the counter)	Physiotherapy				Surgery		No										Stongly Disagree	Stongly Disagree	Stongly Disagree		Yes	Agree	Agree	Neither agree nor disagree	Agree	Neither agree nor disagree	Agree	Agree	Agree	Very unlikely	Interested	Interested	Interested	Interested	Neutral	Likely	Very Likely	Neither likely nor unlikely	Likely	Unlikely	Neither likely nor unlikely	No
Yes	Yes - myself			Exercise & physical activity	Weight management		Medication (over the counter)		Nutrition as medicine (anti-inflammatory diet)					Yes								Other	Google	Neither agree nor disagree	Neither agree nor disagree	Neither agree nor disagree		Yes	Strongly Agree	Neither agree nor disagree	Agree	Agree	Strongly Agree	Agree	Strongly Agree	Strongly Agree	Unlikely	Interested	Interested	Interested	Very interested	Neutral	Unlikely	Likely	Very Unlikely	Very Unlikely	Very Unlikely	Very Likely	No
Yes	Yes - myself						Medication (over the counter)					Surgery		No										Stongly Disagree	Stongly Disagree	Stongly Disagree		Yes	Agree	Agree	Agree	Agree	Agree	Agree	Agree	Agree	Very unlikely	Interested	Very interested	Very interested	Interested	Neutral	Very Likely	Very Likely	Neither likely nor unlikely	Very Likely	Neither likely nor unlikely	Very Likely	Yes, please explain
Yes	Yes - myself	Yes- I know someone		Exercise & physical activity	Weight management	Medication (prescription only)	Medication (over the counter)	Physiotherapy		Supplements (e.g., Chondroitin, Glucosamine)				Yes	NHS (website)	NHS (doctor's advice)		Magazines (e.g., Women's/ Men's Health, Good Housekeeping)			Charities (e.g., Versus Arthritis, Arthritis Action)			Agree	Agree	Neither agree nor disagree		Yes	Agree	Agree	Agree	Agree	Agree	Agree	Agree	Neither agree nor disagree	Very likely	Interested	Interested	Neutral	Interested	Neutral	Unlikely	Neither likely nor unlikely	Unlikely	Unlikely	Neither likely nor unlikely	Likely	No
Yes		Yes- I know someone		Exercise & physical activity	Weight management	Medication (prescription only)	Medication (over the counter)							No										Disagree	Disagree	Neither agree nor disagree		No	Agree	Agree	Neither agree nor disagree	Agree	Agree	Agree	Neither agree nor disagree	Agree													Yes, please explain
Yes	Yes - myself			Exercise & physical activity	Weight management	Medication (prescription only)	Medication (over the counter)	Physiotherapy	Nutrition as medicine (anti-inflammatory diet)	Supplements (e.g., Chondroitin, Glucosamine)	Herbs	Surgery		Yes	NHS (website)	NHS (doctor's advice)	BBC Food (website)				Charities (e.g., Versus Arthritis, Arthritis Action)			Disagree	Disagree	Disagree		Yes	Strongly Agree	Strongly Agree	Stongly Disagree	Neither agree nor disagree	Agree	Strongly Agree	Agree	Agree	Likely	Very interested	Interested	Very interested	Very interested	Interested	Likely	Likely	Unlikely	Likely	Neither likely nor unlikely	Very Likely	Yes, please explain
Yes			No	Exercise & physical activity		Medication (prescription only)	Medication (over the counter)	Physiotherapy	Nutrition as medicine (anti-inflammatory diet)	Supplements (e.g., Chondroitin, Glucosamine)				No										Disagree	Neither agree nor disagree	Neither agree nor disagree		No	Strongly Agree	Agree	Neither agree nor disagree	Agree	Strongly Agree	Agree	Agree	Neither agree nor disagree													Yes, please explain
Yes		Yes- I know someone		Exercise & physical activity	Weight management	Medication (prescription only)			Nutrition as medicine (anti-inflammatory diet)	Supplements (e.g., Chondroitin, Glucosamine)				Yes	NHS (website)	NHS (doctor's advice)				A dietitian/ nutritionist	Charities (e.g., Versus Arthritis, Arthritis Action)			Agree	Disagree	Neither agree nor disagree		Yes	Strongly Agree	Strongly Agree	Disagree	Agree	Strongly Agree	Neither agree nor disagree	Strongly Agree	Neither agree nor disagree													No
Yes		Yes- I know someone		Exercise & physical activity	Weight management			Physiotherapy		Supplements (e.g., Chondroitin, Glucosamine)				No										Agree	Agree	Disagree		Yes	Agree	Agree	Agree	Neither agree nor disagree	Disagree	Agree	Neither agree nor disagree	Agree													No
Yes		Yes- I know someone		Exercise & physical activity		Medication (prescription only)			Nutrition as medicine (anti-inflammatory diet)					Yes		NHS (doctor's advice)					Charities (e.g., Versus Arthritis, Arthritis Action)			Disagree	Disagree	Agree		Yes	Agree	Agree	Agree	Agree	Disagree	Agree	Agree	Neither agree nor disagree													Yes, please explain
Yes		Yes- I know someone		Exercise & physical activity	Weight management	Medication (prescription only)		Physiotherapy						No										Agree	Agree	Agree		Yes	Agree	Agree	Agree	Agree	Agree	Agree	Agree	Agree													No
Yes		Yes- I know someone		Exercise & physical activity	Weight management	Medication (prescription only)	Medication (over the counter)	Physiotherapy		Supplements (e.g., Chondroitin, Glucosamine)				Yes								Other		Neither agree nor disagree	Neither agree nor disagree	Disagree		Yes	Agree	Agree	Neither agree nor disagree	Agree	Agree	Strongly Agree	Strongly Agree	Disagree													Yes, please explain
Yes	Yes - myself	Yes- I know someone		Exercise & physical activity	Weight management	Medication (prescription only)	Medication (over the counter)	Physiotherapy	Nutrition as medicine (anti-inflammatory diet)	Supplements (e.g., Chondroitin, Glucosamine)		Surgery		No										Disagree	Disagree	Disagree		No	Agree	Agree	Agree	Agree	Agree	Agree	Agree	Agree	Unlikely	Interested	Interested	Interested	Neutral	Interested	Likely	Likely	Unlikely	Likely	Likely	Likely	Yes, please explain
Yes		Yes- I know someone		Exercise & physical activity	Weight management							Surgery		No										Stongly Disagree	Stongly Disagree	Stongly Disagree		Yes	Strongly Agree	Agree	Stongly Disagree	Stongly Disagree	Agree	Agree	Disagree	Disagree													No
Yes		Yes- I know someone		Exercise & physical activity	Weight management			Physiotherapy						No										Disagree	Disagree	Stongly Disagree		Yes	Agree	Agree	Agree	Neither agree nor disagree	Neither agree nor disagree	Agree	Strongly Agree	Neither agree nor disagree													No
Yes			No	Exercise & physical activity	Weight management	Medication (prescription only)		Physiotherapy	Nutrition as medicine (anti-inflammatory diet)	Supplements (e.g., Chondroitin, Glucosamine)				No										Disagree	Disagree	Disagree		Yes	Strongly Agree	Strongly Agree	Strongly Agree	Agree	Agree	Agree	Agree	Disagree													No
Yes	Yes - myself	Yes- I know someone		Exercise & physical activity	Weight management	Medication (prescription only)	Medication (over the counter)	Physiotherapy	Nutrition as medicine (anti-inflammatory diet)	Supplements (e.g., Chondroitin, Glucosamine)				Yes	NHS (website)					A dietitian/ nutritionist	Charities (e.g., Versus Arthritis, Arthritis Action)			Neither agree nor disagree	Agree	Agree		Yes	Agree	Strongly Agree	Disagree	Neither agree nor disagree	Agree	Agree	Agree	Neither agree nor disagree	Likely	Interested	Interested	Interested	Interested	Interested	Likely	Neither likely nor unlikely	Very Unlikely	Unlikely	Very Unlikely	Unlikely	No
Yes			No	Exercise & physical activity	Weight management			Physiotherapy						No										Stongly Disagree	Stongly Disagree	Stongly Disagree		Yes	Agree	Agree	Neither agree nor disagree	Agree	Agree	Agree	Agree	Neither agree nor disagree													No
Yes		Yes- I know someone		Exercise & physical activity		Medication (prescription only)	Medication (over the counter)	Physiotherapy				Surgery		No										Disagree	Disagree	Disagree		Yes	Agree	Agree	Agree	Agree	Agree	Agree	Agree	Agree													No
Yes	Yes - myself			Exercise & physical activity	Weight management	Medication (prescription only)		Physiotherapy				Surgery		No										Neither agree nor disagree	Agree	Stongly Disagree		Yes	Neither agree nor disagree	Agree	Neither agree nor disagree	Neither agree nor disagree	Neither agree nor disagree	Agree	Neither agree nor disagree	Stongly Disagree	Unlikely	Not at all interested	Not at all interested	Not at all interested	Not at all interested	Not at all interested	Neither likely nor unlikely	Likely	Neither likely nor unlikely	Unlikely	Unlikely	Likely	No
Yes		Yes- I know someone		Exercise & physical activity		Medication (prescription only)	Medication (over the counter)					Surgery		Yes	NHS (website)						Charities (e.g., Versus Arthritis, Arthritis Action)			Neither agree nor disagree	Agree	Neither agree nor disagree		Yes	Neither agree nor disagree	Neither agree nor disagree	Neither agree nor disagree	Neither agree nor disagree	Neither agree nor disagree	Disagree	Agree	Stongly Disagree													No
Yes	Yes - myself	Yes- I know someone		Exercise & physical activity	Weight management	Medication (prescription only)	Medication (over the counter)	Physiotherapy	Nutrition as medicine (anti-inflammatory diet)	Supplements (e.g., Chondroitin, Glucosamine)		Surgery		Yes	NHS (website)	NHS (doctor's advice)								Agree	Agree	Agree		Yes	Agree	Agree	Agree	Agree	Agree	Agree	Agree	Agree	Likely	Neutral	Neutral	Neutral	Neutral	Neutral	Unlikely	Neither likely nor unlikely	Unlikely	Unlikely	Very Unlikely	Unlikely	No
Yes		Yes- I know someone		Exercise & physical activity	Weight management		Medication (over the counter)							No										Agree	Agree	Agree		Yes	Agree	Agree	Neither agree nor disagree	Agree	Agree	Agree	Agree	Neither agree nor disagree													No
Yes	Yes - myself			Exercise & physical activity	Weight management		Medication (over the counter)	Physiotherapy	Nutrition as medicine (anti-inflammatory diet)	Supplements (e.g., Chondroitin, Glucosamine)				Yes	NHS (website)		BBC Food (website)				Charities (e.g., Versus Arthritis, Arthritis Action)			Agree	Agree	Agree		Yes	Strongly Agree	Strongly Agree	Agree	Agree	Strongly Agree	Strongly Agree	Strongly Agree	Agree	Likely	Interested	Interested	Interested	Interested	Interested	Likely	Likely	Unlikely	Likely	Very Unlikely	Neither likely nor unlikely	No
Yes	Yes - myself			Exercise & physical activity		Medication (prescription only)	Medication (over the counter)	Physiotherapy				Surgery		No										Disagree	Neither agree nor disagree	Disagree		Yes	Agree	Neither agree nor disagree	Strongly Agree	Agree	Agree	Agree	Agree	Agree	Unlikely	Interested	Interested	Neutral	Interested	Slightly interested	Likely	Very Likely	Neither likely nor unlikely	Likely	Unlikely	Likely	No
Yes			No	Exercise & physical activity	Weight management	Medication (prescription only)								No										Disagree	Disagree	Disagree		No	Agree	Agree	Agree	Agree	Agree	Agree	Agree	Disagree													No
Yes	Yes - myself			Exercise & physical activity	Weight management	Medication (prescription only)		Physiotherapy						No										Disagree	Disagree	Neither agree nor disagree		Yes	Agree	Agree	Agree	Disagree	Agree	Agree	Agree	Neither agree nor disagree	Unlikely	Interested	Neutral	Interested	Interested	Slightly interested	Neither likely nor unlikely	Likely	Unlikely	Likely	Unlikely	Very Likely	No
Yes		Yes- I know someone		Exercise & physical activity	Weight management	Medication (prescription only)	Medication (over the counter)	Physiotherapy						No										Disagree	Stongly Disagree	Stongly Disagree		Yes	Agree	Agree	Agree	Neither agree nor disagree	Agree	Agree	Agree	Neither agree nor disagree													No
Yes		Yes- I know someone		Exercise & physical activity	Weight management				Nutrition as medicine (anti-inflammatory diet)	Supplements (e.g., Chondroitin, Glucosamine)				Yes					Blogs			Other	Social media eg Reddit	Agree	Agree	Strongly Agree		Yes	Strongly Agree	Strongly Agree	Disagree	Agree	Strongly Agree	Strongly Agree	Neither agree nor disagree	Neither agree nor disagree													Yes, please explain
Yes	Yes - myself			Exercise & physical activity	Weight management		Medication (over the counter)	Physiotherapy		Supplements (e.g., Chondroitin, Glucosamine)		Surgery		No										Disagree	Neither agree nor disagree	Disagree		No	Agree	Agree	Neither agree nor disagree	Neither agree nor disagree	Agree	Agree	Neither agree nor disagree	Neither agree nor disagree	Unlikely	Interested	Interested	Interested	Interested	Interested	Unlikely	Likely	Unlikely	Neither likely nor unlikely	Very Unlikely	Likely	No
Yes	Yes - myself			Exercise & physical activity	Weight management	Medication (prescription only)	Medication (over the counter)							Yes	NHS (website)	NHS (doctor's advice)								Stongly Disagree	Stongly Disagree	Stongly Disagree		Yes	Strongly Agree	Strongly Agree	Strongly Agree	Strongly Agree	Strongly Agree	Strongly Agree	Strongly Agree	Strongly Agree	Neutral	Very interested	Very interested	Very interested	Very interested	Very interested	Very Likely	Very Likely	Very Likely	Very Likely	Neither likely nor unlikely	Very Likely	No
Yes		Yes- I know someone		Exercise & physical activity						Supplements (e.g., Chondroitin, Glucosamine)				No										Stongly Disagree	Stongly Disagree	Stongly Disagree		Yes	Strongly Agree	Strongly Agree	Neither agree nor disagree	Strongly Agree	Strongly Agree	Agree	Strongly Agree	Neither agree nor disagree													No
Yes	Yes - myself	Yes- I know someone		Exercise & physical activity	Weight management	Medication (prescription only)		Physiotherapy		Supplements (e.g., Chondroitin, Glucosamine)		Surgery		No										Neither agree nor disagree	Agree	Neither agree nor disagree		Yes	Agree	Agree	Agree	Agree	Agree	Agree	Disagree	Agree	Neutral	Neutral	Neutral	Neutral	Slightly interested	Neutral	Likely	Likely	Neither likely nor unlikely	Very Likely	Neither likely nor unlikely	Very Likely	No
Yes		Yes- I know someone		Exercise & physical activity		Medication (prescription only)								No										Stongly Disagree	Stongly Disagree	Stongly Disagree		Yes	Strongly Agree	Strongly Agree	Strongly Agree	Strongly Agree	Strongly Agree	Strongly Agree	Agree	Agree													Yes, please explain
Yes		Yes- I know someone		Exercise & physical activity		Medication (prescription only)			Nutrition as medicine (anti-inflammatory diet)	Supplements (e.g., Chondroitin, Glucosamine)				No										Stongly Disagree	Stongly Disagree	Disagree		No	Agree	Strongly Agree	Agree	Agree	Agree	Strongly Agree	Strongly Agree	Strongly Agree													No
Yes		Yes- I know someone		Exercise & physical activity	Weight management	Medication (prescription only)		Physiotherapy						No										Disagree	Disagree	Stongly Disagree		Yes	Strongly Agree	Strongly Agree	Agree	Agree	Agree	Strongly Agree	Strongly Agree	Agree													No
Yes		Yes- I know someone		Exercise & physical activity		Medication (prescription only)		Physiotherapy		Supplements (e.g., Chondroitin, Glucosamine)		Surgery		No										Neither agree nor disagree	Disagree	Disagree		Yes	Neither agree nor disagree	Neither agree nor disagree	Agree	Agree	Strongly Agree	Neither agree nor disagree	Agree	Agree													Yes, please explain
Yes	Yes - myself			Exercise & physical activity			Medication (over the counter)	Physiotherapy	Nutrition as medicine (anti-inflammatory diet)	Supplements (e.g., Chondroitin, Glucosamine)				Yes	NHS (website)									Agree	Agree	Agree		Yes	Strongly Agree	Strongly Agree	Strongly Agree	Disagree	Strongly Agree	Strongly Agree	Agree	Strongly Agree	Very likely	Very interested	Slightly interested	Slightly interested	Very interested	Not at all interested	Very Unlikely	Likely	Very Unlikely	Likely	Very Unlikely	Unlikely	No
Yes		Yes- I know someone		Exercise & physical activity	Weight management	Medication (prescription only)		Physiotherapy	Nutrition as medicine (anti-inflammatory diet)	Supplements (e.g., Chondroitin, Glucosamine)		Surgery		Yes	NHS (website)	NHS (doctor's advice)	BBC Food (website)			A dietitian/ nutritionist	Charities (e.g., Versus Arthritis, Arthritis Action)			Agree	Agree	Agree		Yes	Agree	Agree	Disagree	Neither agree nor disagree	Agree	Agree	Agree	Neither agree nor disagree													No
Yes		Yes- I know someone		Exercise & physical activity	Weight management	Medication (prescription only)	Medication (over the counter)	Physiotherapy	Nutrition as medicine (anti-inflammatory diet)	Supplements (e.g., Chondroitin, Glucosamine)		Surgery		No										Agree	Disagree	Agree		Yes	Agree	Strongly Agree	Agree	Agree	Strongly Agree	Strongly Agree	Strongly Agree	Neither agree nor disagree													Yes, please explain
Yes		Yes- I know someone		Exercise & physical activity	Weight management	Medication (prescription only)		Physiotherapy	Nutrition as medicine (anti-inflammatory diet)	Supplements (e.g., Chondroitin, Glucosamine)				Yes	NHS (website)							Other	Web	Agree	Agree	Disagree		Yes	Agree	Agree	Disagree	Neither agree nor disagree	Agree	Agree	Agree	Neither agree nor disagree													No
Yes	Yes - myself			Exercise & physical activity	Weight management	Medication (prescription only)	Medication (over the counter)	Physiotherapy		Supplements (e.g., Chondroitin, Glucosamine)		Surgery		Yes	NHS (website)	NHS (doctor's advice)								Neither agree nor disagree	Agree	Disagree		Yes	Agree	Agree	Strongly Agree	Stongly Disagree	Neither agree nor disagree	Strongly Agree	Strongly Agree	Strongly Agree	Likely	Interested	Very interested	Neutral	Neutral	Neutral	Neither likely nor unlikely	Likely	Neither likely nor unlikely	Neither likely nor unlikely	Very Unlikely	Likely	No
Yes			No										None of the above	No										Stongly Disagree	Stongly Disagree	Stongly Disagree		No	Agree	Agree	Disagree	Agree	Agree	Agree	Agree	Agree													No
Yes	Yes - myself				Weight management			Physiotherapy				Surgery		No										Stongly Disagree	Stongly Disagree	Stongly Disagree		Yes	Strongly Agree	Disagree	Agree	Agree	Agree	Agree	Agree	Neither agree nor disagree	Very unlikely	Very interested	Very interested	Very interested	Very interested	Interested	Neither likely nor unlikely	Very Likely	Likely	Very Unlikely	Very Unlikely	Unlikely	No
Yes		Yes- I know someone		Exercise & physical activity	Weight management	Medication (prescription only)	Medication (over the counter)	Physiotherapy	Nutrition as medicine (anti-inflammatory diet)	Supplements (e.g., Chondroitin, Glucosamine)		Surgery		No										Disagree	Disagree	Neither agree nor disagree		Yes	Strongly Agree	Strongly Agree	Agree	Strongly Agree	Agree	Strongly Agree	Agree	Neither agree nor disagree													No
Yes			No		Weight management	Medication (prescription only)			Nutrition as medicine (anti-inflammatory diet)					No										Disagree	Disagree	Strongly Agree		Yes	Strongly Agree	Strongly Agree	Neither agree nor disagree	Neither agree nor disagree	Agree	Strongly Agree	Agree	Neither agree nor disagree													Yes, please explain
Yes	Yes - myself			Exercise & physical activity	Weight management	Medication (prescription only)	Medication (over the counter)	Physiotherapy		Supplements (e.g., Chondroitin, Glucosamine)				No										Neither agree nor disagree	Neither agree nor disagree	Disagree		Yes	Agree	Agree	Neither agree nor disagree	Neither agree nor disagree	Agree	Agree	Neither agree nor disagree	Neither agree nor disagree	Neutral	Interested	Slightly interested	Slightly interested	Interested	Not at all interested	Unlikely	Likely	Neither likely nor unlikely	Likely	Very Unlikely	Likely	No
Yes		Yes- I know someone		Exercise & physical activity	Weight management	Medication (prescription only)				Supplements (e.g., Chondroitin, Glucosamine)		Surgery		Yes	NHS (website)									Disagree	Disagree	Neither agree nor disagree		Yes	Strongly Agree	Strongly Agree	Agree	Disagree	Agree	Agree	Agree	Agree													Yes, please explain
Yes	Yes - myself			Exercise & physical activity			Medication (over the counter)	Physiotherapy						No										Neither agree nor disagree	Neither agree nor disagree	Disagree		No	Neither agree nor disagree	Neither agree nor disagree	Disagree	Neither agree nor disagree	Agree	Agree	Neither agree nor disagree	Disagree	Unlikely	Not at all interested	Not at all interested	Not at all interested	Not at all interested	Not at all interested	Neither likely nor unlikely	Neither likely nor unlikely	Unlikely	Neither likely nor unlikely	Unlikely	Likely	No
Yes	Yes - myself	Yes- I know someone		Exercise & physical activity	Weight management	Medication (prescription only)		Physiotherapy	Nutrition as medicine (anti-inflammatory diet)		Herbs			Yes	NHS (website)	NHS (doctor's advice)				A dietitian/ nutritionist	Charities (e.g., Versus Arthritis, Arthritis Action)			Neither agree nor disagree	Neither agree nor disagree	Agree		Yes	Agree	Agree	Agree	Agree	Agree	Agree	Agree	Neither agree nor disagree	Unlikely	Not at all interested	Slightly interested	Not at all interested	Not at all interested	Slightly interested	Likely	Likely	Likely	Likely	Neither likely nor unlikely	Very Unlikely	No
Yes	Yes - myself				Weight management			Physiotherapy				Surgery		No										Disagree	Disagree	Strongly Agree		Yes	Strongly Agree	Disagree	Disagree	Agree	Strongly Agree	Disagree	Agree	Strongly Agree	Unlikely	Very interested	Very interested	Very interested	Very interested	Very interested	Unlikely	Very Likely	Likely	Very Likely	Very Unlikely	Likely	No
Yes	Yes - myself	Yes- I know someone		Exercise & physical activity	Weight management	Medication (prescription only)	Medication (over the counter)	Physiotherapy	Nutrition as medicine (anti-inflammatory diet)	Supplements (e.g., Chondroitin, Glucosamine)	Herbs	Surgery		Yes	NHS (website)	NHS (doctor's advice)								Agree	Neither agree nor disagree	Agree		Yes	Strongly Agree	Strongly Agree	Agree	Neither agree nor disagree	Agree	Agree	Agree	Neither agree nor disagree	Likely	Interested	Interested	Interested	Interested	Interested	Neither likely nor unlikely	Very Likely	Likely	Likely	Neither likely nor unlikely	Very Likely	No
Yes		Yes- I know someone				Medication (prescription only)		Physiotherapy	Nutrition as medicine (anti-inflammatory diet)	Supplements (e.g., Chondroitin, Glucosamine)	Herbs			Yes	NHS (website)		BBC Food (website)	Magazines (e.g., Women's/ Men's Health, Good Housekeeping)	Blogs	A dietitian/ nutritionist	Charities (e.g., Versus Arthritis, Arthritis Action)			Agree	Agree	Agree		Yes	Strongly Agree	Strongly Agree	Agree	Agree	Strongly Agree	Strongly Agree	Strongly Agree	Agree													No
Yes	Yes - myself			Exercise & physical activity	Weight management	Medication (prescription only)	Medication (over the counter)	Physiotherapy		Supplements (e.g., Chondroitin, Glucosamine)		Surgery		No										Disagree	Disagree	Disagree		Yes	Agree	Agree	Agree	Agree	Agree	Agree	Agree	Agree	Unlikely	Not at all interested	Not at all interested	Not at all interested	Not at all interested	Not at all interested	Likely	Likely	Unlikely	Unlikely	Unlikely	Unlikely	No
Yes			No	Exercise & physical activity				Physiotherapy						No										Disagree	Stongly Disagree	Neither agree nor disagree		Yes	Agree	Agree	Neither agree nor disagree	Disagree	Agree	Agree	Neither agree nor disagree	Neither agree nor disagree													No
Yes			No	Exercise & physical activity		Medication (prescription only)			Nutrition as medicine (anti-inflammatory diet)					No										Disagree	Disagree	Neither agree nor disagree		Yes	Agree	Agree	Agree	Agree	Agree	Agree	Agree	Disagree													Yes, please explain
Yes		Yes- I know someone		Exercise & physical activity	Weight management	Medication (prescription only)			Nutrition as medicine (anti-inflammatory diet)			Surgery		No										Disagree	Disagree	Disagree		Yes	Agree	Agree	Agree	Neither agree nor disagree	Neither agree nor disagree	Agree	Agree	Agree													No
Yes		Yes- I know someone				Medication (prescription only)								No										Disagree	Disagree	Disagree		No	Agree	Agree	Agree	Agree	Agree	Agree	Agree	Agree													Yes, please explain
Yes	Yes - myself	Yes- I know someone		Exercise & physical activity	Weight management	Medication (prescription only)	Medication (over the counter)	Physiotherapy	Nutrition as medicine (anti-inflammatory diet)	Supplements (e.g., Chondroitin, Glucosamine)				No										Agree	Strongly Agree	Agree		Yes	Agree	Strongly Agree	Agree	Strongly Agree	Strongly Agree	Strongly Agree	Agree	Agree	Unlikely	Interested	Interested	Interested	Very interested	Interested	Very Unlikely	Very Likely	Very Unlikely	Very Unlikely	Very Unlikely	Likely	Yes, please explain
Yes	Yes - myself			Exercise & physical activity										No										Agree	Neither agree nor disagree	Disagree		No	Strongly Agree	Agree	Neither agree nor disagree	Disagree	Stongly Disagree	Agree	Agree	Neither agree nor disagree	Neutral	Interested	Not at all interested	Interested	Interested	Not at all interested	Likely	Neither likely nor unlikely	Unlikely	Likely	Likely	Neither likely nor unlikely	No
Yes	Yes - myself			Exercise & physical activity	Weight management	Medication (prescription only)	Medication (over the counter)	Physiotherapy	Nutrition as medicine (anti-inflammatory diet)	Supplements (e.g., Chondroitin, Glucosamine)		Surgery		No										Disagree	Disagree	Disagree		Yes	Agree	Agree	Agree	Agree	Agree	Agree	Agree	Agree	Very unlikely	Interested	Interested	Interested	Interested	Slightly interested	Likely	Likely	Very Likely	Unlikely	Unlikely	Unlikely	No
Yes			No	Exercise & physical activity		Medication (prescription only)		Physiotherapy						No										Stongly Disagree	Stongly Disagree	Disagree		Yes	Agree	Agree	Agree	Agree	Agree	Agree	Agree	Agree													No
Yes	Yes - myself			Exercise & physical activity	Weight management	Medication (prescription only)		Physiotherapy	Nutrition as medicine (anti-inflammatory diet)			Surgery		Yes		NHS (doctor's advice)								Agree	Agree	Agree		Yes	Strongly Agree	Agree	Disagree	Stongly Disagree	Agree	Agree	Agree	Strongly Agree	Likely	Neutral	Neutral	Neutral	Interested	Slightly interested	Unlikely	Likely	Unlikely	Unlikely	Unlikely	Likely	Yes, please explain
Yes		Yes- I know someone		Exercise & physical activity	Weight management	Medication (prescription only)		Physiotherapy	Nutrition as medicine (anti-inflammatory diet)	Supplements (e.g., Chondroitin, Glucosamine)	Herbs	Surgery		Yes		NHS (doctor's advice)		Magazines (e.g., Women's/ Men's Health, Good Housekeeping)			Charities (e.g., Versus Arthritis, Arthritis Action)			Neither agree nor disagree	Agree	Agree		Yes	Agree	Agree	Agree	Agree	Agree	Agree	Agree	Neither agree nor disagree													No
Yes	Yes - myself			Exercise & physical activity	Weight management	Medication (prescription only)	Medication (over the counter)	Physiotherapy	Nutrition as medicine (anti-inflammatory diet)	Supplements (e.g., Chondroitin, Glucosamine)		Surgery		No										Disagree	Disagree	Disagree		Yes	Agree	Agree	Agree	Agree	Agree	Agree	Neither agree nor disagree	Neither agree nor disagree	Unlikely	Neutral	Interested	Neutral	Neutral	Neutral	Unlikely	Likely	Neither likely nor unlikely	Unlikely	Unlikely	Unlikely	No
Yes	Yes - myself			Exercise & physical activity				Physiotherapy						No										Disagree	Agree	Disagree		Yes	Agree	Agree	Disagree	Agree	Agree	Agree	Agree	Disagree	Neutral	Neutral	Interested	Neutral	Interested	Neutral	Likely	Likely	Unlikely	Neither likely nor unlikely	Unlikely	Likely	No
Yes	Yes - myself			Exercise & physical activity	Weight management			Physiotherapy		Supplements (e.g., Chondroitin, Glucosamine)		Surgery		No										Neither agree nor disagree	Neither agree nor disagree	Disagree		Yes	Strongly Agree	Strongly Agree	Agree	Agree	Agree	Strongly Agree	Agree	Agree	Neutral	Very interested	Neutral	Neutral	Interested	Neutral	Neither likely nor unlikely	Very Likely	Unlikely	Neither likely nor unlikely	Unlikely	Likely	No
Yes	Yes - myself			Exercise & physical activity	Weight management	Medication (prescription only)	Medication (over the counter)	Physiotherapy	Nutrition as medicine (anti-inflammatory diet)	Supplements (e.g., Chondroitin, Glucosamine)		Surgery		No										Disagree	Disagree	Disagree		Yes	Neither agree nor disagree	Agree	Agree	Agree	Agree	Agree	Agree	Agree	Unlikely	Neutral	Neutral	Neutral	Neutral	Neutral	Likely	Likely	Unlikely	Likely	Very Unlikely	Very Unlikely	No
Yes	Yes - myself			Exercise & physical activity	Weight management									No										Agree	Agree	Agree		Yes	Agree	Agree	Neither agree nor disagree	Agree	Agree	Agree	Agree	Neither agree nor disagree	Neutral	Neutral	Neutral	Neutral	Interested	Interested	Neither likely nor unlikely	Neither likely nor unlikely	Likely	Likely	Very Unlikely	Very Likely	No
Yes		Yes- I know someone		Exercise & physical activity					Nutrition as medicine (anti-inflammatory diet)	Supplements (e.g., Chondroitin, Glucosamine)				No										Agree	Agree	Disagree		Yes	Agree	Agree	Neither agree nor disagree	Neither agree nor disagree	Agree	Agree	Neither agree nor disagree	Neither agree nor disagree													No
[truncated: 78 more rows]
[truncated: 71 more columns]
